# Supplementary material
Source: publisher figshare collection journal article supplement (https://frontiersin.figshare.com/ndownloader/files/40927898)
Supplement: Supplementary file 1 [file 40927898]

omega	beta	1/sqrt(beta)	Energies / Eh
250000	15150	0.00812452	-344.9886	-324.442	-322.798	-320.0106	-316.1879	-311.2044	-305.2788	-298.1413	-290.1315	-280.8444	-270.7283	-259.2649	-246.9905	-233.2957	-218.785	-202.7738	-185.9236	-167.4811	-148.1831	-127.2852	-117.4189	-109.8557	-109.1852	-107.7657	-105.8758	-104.7712	-101.9485	-97.8488	-96.7857	-93.4836	-92.8348	-89.3204	-87.1848	-83.7152	-81.9161	-79.579	-76.5371	-73.0868	-68.8338	-65.3047	-59.9851	-57.6202	-56.792	-54.954	-52.5969	-50.943	-50.8384
275000	15889	0.00793322	-348.3644	-327.6417	-325.9111	-322.9787	-318.9593	-313.7216	-307.4956	-299.9991	-291.5871	-281.8375	-271.2169	-259.1865	-246.3037	-231.9354	-216.7096	-199.9149	-182.2404	-162.9026	-142.6839	-121.1504	-117.4599	-110.0761	-109.3759	-107.8425	-105.4148	-101.9859	-98.707	-97.2194	-96.42	-93.7993	-92.1928	-89.2881	-86.3663	-83.2119	-79.8982	-75.6422	-73.1958	-71.0339	-67.2585	-63.8119	-58.0706	-57.3826	-54.7506	-52.4762	-50.8513	-50.6641	-49.0422
300000	16596	0.00776252	-351.4239	-330.5327	-328.719	-325.6476	-321.4398	-315.9588	-309.4453	-301.6056	-292.8089	-282.6171	-271.5143	-258.9423	-245.4781	-230.4664	-214.5578	-197.0151	-178.5542	-158.3635	-137.28	-118.7477	-113.9297	-110.27	-109.5424	-107.9177	-105.3434	-101.6893	-97.8598	-97.1564	-94.0926	-92.3404	-89.7111	-89.1217	-85.595	-82.5523	-79.0181	-74.5162	-71.381	-66.0118	-64.1195	-61.8168	-57.5758	-56.1834	-53.0501	-52.3921	-50.8409	-50.5089	-48.1937
325000	17273	0.00760873	-354.2183	-333.1657	-331.2722	-328.067	-323.678	-317.9634	-311.1738	-303.0046	-293.8386	-283.2227	-271.6572	-258.5656	-244.5439	-228.9154	-212.3522	-194.0927	-174.879	-153.8734	-131.989	-118.8496	-110.4537	-109.7539	-108.4475	-107.565	-105.1992	-101.3984	-98.0997	-96.779	-94.3071	-91.6522	-88.8801	-85.832	-82.7813	-81.4695	-78.1366	-73.3669	-70.3812	-64.34	-61.6819	-57.6864	-55.8544	-54.2526	-52.2541	-51.2028	-50.797	-50.2816	-47.9557
350000	17925	0.00746906	-356.7874	-335.5803	-333.6095	-330.2753	-325.7117	-319.7719	-312.7163	-304.2298	-294.7083	-283.6841	-271.6733	-258.0819	-243.5237	-227.302	-210.1093	-191.1608	-171.2241	-149.4384	-126.8595	-119.0179	-110.6072	-109.8576	-108.1175	-105.343	-102.3937	-100.6825	-98.324	-96.3627	-94.4414	-91.2887	-88.4898	-85.1521	-81.1619	-78.2499	-75.1186	-72.1408	-69.3757	-62.8496	-60.3311	-57.7819	-53.6873	-52.011	-50.9333	-50.6417	-50.0561	-47.8043	-47.2013
364614	18296	0.00739307	-358.1977	-336.9032	-334.8884	-331.4808	-326.8178	-320.75	-313.5431	-304.8764	-295.1528	-283.8967	-271.6328	-257.7575	-242.8946	-226.3361	-208.7859	-189.4463	-169.0997	-146.8734	-124.0196	-119.0073	-110.6918	-109.9264	-108.1298	-105.2456	-101.3842	-99.0578	-97.8684	-95.9553	-94.4703	-91.0999	-88.2133	-84.8881	-80.6414	-77.6635	-72.2699	-70.9973	-68.5554	-62.0207	-59.5664	-57.8133	-53.2847	-51.5534	-50.8479	-50.3616	-49.1565	-47.7099	-46.9729
380000	18678	0.00731707	-359.6168	-338.2326	-336.1724	-332.689	-327.9234	-321.7234	-314.3604	-305.5077	-295.5756	-284.0802	-271.5553	-257.3872	-242.2102	-225.3043	-207.3856	-187.6429	-166.8741	-144.1959	-121.5135	-118.5479	-110.7759	-109.9941	-108.1434	-105.1708	-101.1076	-98.8937	-96.5645	-94.5163	-94.1044	-90.8344	-87.8833	-84.6264	-80.1035	-77.2181	-71.1109	-69.1652	-66.4034	-61.1764	-58.7787	-57.7721	-53.0844	-50.9986	-50.8229	-50.1978	-48.1742	-47.6115	-46.6948
399374	19148	0.00722667	-361.3161	-339.8223	-337.706	-334.1291	-329.237	-322.8743	-315.3191	-306.2373	-296.0484	-284.2586	-271.4124	-256.8839	-241.3202	-223.987	-205.615	-185.3765	-164.089	-140.8594	-120.3576	-116.0292	-110.8746	-110.069	-108.1524	-105.0779	-100.872	-99.0457	-96.2308	-94.3892	-91.5257	-89.3667	-87.3395	-84.2628	-79.4273	-76.7072	-70.2107	-68.1299	-62.2063	-60.0935	-58.17	-57.0869	-52.9759	-50.8124	-50.4663	-49.8129	-47.4936	-47.1778	-46.0984
420000	19636	0.00713626	-363.0279	-341.4209	-339.2463	-335.5721	-330.5486	-324.0167	-316.2617	-306.942	-296.4865	-284.3908	-271.211	-256.3085	-240.3433	-222.5666	-203.7243	-182.9715	-161.1468	-137.353	-120.2819	-112.3259	-110.9636	-110.1123	-108.135	-104.9634	-100.6463	-99.2244	-96.1178	-94.2166	-91.03	-87.3142	-85.3358	-83.3835	-78.699	-76.1566	-69.3503	-67.2888	-59.5633	-58.5506	-57.5846	-54.6706	-52.9264	-50.7907	-50.2572	-49.1304	-47.3327	-46.5758	-45.0575
439432	20085	0.00705602	-364.5573	-342.847	-340.6186	-336.8548	-331.7102	-325.0226	-317.0837	-307.5451	-296.8442	-284.4672	-270.9805	-255.7339	-239.3996	-221.215	-201.9403	-180.7148	-158.3974	-134.0975	-120.3614	-111.0764	-110.319	-108.8795	-107.8363	-104.7986	-100.4316	-99.3765	-96.0801	-93.9955	-90.851	-86.7535	-84.1979	-80.3591	-77.9459	-75.5437	-68.5965	-66.5039	-58.6821	-58.2441	-56.1621	-52.9034	-50.8416	-50.6694	-50.1434	-48.4588	-47.1552	-46.1195	-44.8667
460000	20550	0.00697579	-366.0963	-344.2799	-341.9957	-338.1391	-332.8691	-326.0202	-317.8909	-308.1257	-297.1708	-284.5028	-270.6984	-255.096	-238.3798	-219.7734	-200.0516	-178.3377	-155.5122	-130.7133	-120.4598	-111.1578	-110.3327	-108.2914	-105.4717	-103.9589	-100.1501	-99.5034	-96.0648	-93.717	-90.7003	-86.2578	-83.7875	-77.7907	-76.3943	-74.1841	-67.8505	-65.6264	-58.4613	-57.6126	-54.8893	-52.8854	-50.7524	-50.051	-48.3129	-47.0011	-45.9374	-45.5847	-44.8019
479479	20981	0.00690384	-367.4845	-345.5707	-343.2347	-339.2919	-333.9055	-326.9072	-318.6013	-308.6261	-297.4358	-284.498	-270.3994	-254.4672	-237.3972	-218.4001	-198.2643	-176.0983	-152.8038	-127.595	-120.5133	-111.2345	-110.382	-108.2518	-104.93	-101.5254	-99.5694	-99.4145	-96.0226	-93.4174	-90.5559	-85.8077	-83.4734	-76.9975	-75.2417	-70.9964	-67.1797	-64.6954	-58.4811	-56.8705	-53.7763	-52.8606	-50.7292	-49.9588	-47.9283	-46.7774	-45.137	-44.6605	-43.5136
500000	21425	0.00683188	-368.8803	-346.8668	-344.4773	-340.4455	-334.9388	-327.7861	-319.298	-309.1061	-297.6728	-284.4567	-270.0544	-253.7822	-236.3472	-216.9473	-196.3845	-173.7526	-149.9767	-124.5209	-120.4005	-111.3112	-110.4338	-108.2308	-104.7613	-100.6429	-99.5501	-97.1621	-95.581	-93.0327	-90.3658	-85.3456	-83.1468	-76.3563	-74.5611	-67.3852	-66.4031	-63.3901	-58.5251	-56.1171	-52.9264	-52.5457	-50.703	-49.8514	-47.6901	-46.5734	-44.923	-44.1843	-42.9919
528938	22036	0.00673646	-370.7431	-348.5937	-346.1304	-341.9759	-336.3037	-328.9384	-320.1993	-309.709	-297.9413	-284.3423	-269.5223	-252.7823	-234.8454	-214.8914	-193.7418	-170.4699	-146.0367	-121.9437	-118.5578	-111.4117	-110.4989	-108.1998	-104.5827	-100.5647	-99.3865	-96.4171	-93.1285	-91.448	-89.5466	-84.7098	-82.639	-75.553	-73.696	-65.7614	-63.8598	-59.5479	-58.5912	-55.1183	-52.8198	-51.0703	-50.6483	-49.6222	-47.4528	-46.3125	-44.8248	-43.4124	-42.4387
560000	22674	0.00664104	-372.6189	-350.3297	-347.7891	-343.5063	-337.6611	-330.0738	-321.0726	-310.2711	-298.1543	-284.1558	-268.8999	-251.6719	-233.2115	-212.6799	-190.9187	-166.9805	-141.8705	-121.6649	-114.2256	-111.5045	-110.5441	-108.144	-104.3956	-100.6827	-99.1284	-96.3941	-92.4495	-90.3846	-85.6058	-83.9594	-81.822	-74.7809	-72.7316	-64.867	-62.1924	-58.6595	-54.5339	-53.6215	-52.6075	-50.6394	-49.9196	-48.6608	-47.2308	-46.0597	-44.7447	-42.8597	-41.6599
589046	23255	0.00655761	-374.2695	-351.8547	-349.2436	-344.8438	-338.8408	-331.0513	-321.8114	-310.7263	-298.2917	-283.9296	-268.2769	-250.6049	-231.6682	-210.6111	-188.2939	-163.7508	-138.038	-121.7314	-111.6341	-110.8103	-109.8185	-107.9534	-104.1922	-100.8176	-98.8612	-96.3966	-92.0113	-90.0724	-83.7614	-82.4269	-79.2717	-74.1196	-71.7359	-64.0793	-60.9124	-58.7013	-53.7265	-52.3749	-50.5942	-49.9097	-49.2053	-47.1147	-45.873	-45.7824	-44.6639	-42.5148	-40.9735
620000	23858	0.00647418	-375.93	-353.3863	-350.7017	-346.1802	-340.0131	-332.0134	-322.5253	-311.1456	-298.3807	-283.6408	-267.5759	-249.4428	-230.0115	-208.409	-185.5147	-160.3451	-134.0312	-121.835	-111.7021	-110.726	-108.2836	-105.4202	-103.6949	-100.9047	-98.5557	-96.3696	-91.5952	-89.7661	-83.1792	-81.5175	-74.7917	-73.4268	-70.3658	-63.2668	-59.6971	-58.6556	-53.438	-51.7523	-50.5428	-49.4322	-47.512	-46.6001	-45.6073	-44.5637	-42.2062	-40.985	-40.3306
649134	24412	0.00640029	-377.4088	-354.7483	-351.9961	-347.3626	-341.0446	-332.8515	-323.1353	-311.4848	-298.4165	-283.3296	-266.8861	-248.3296	-228.4441	-206.3409	-182.9174	-157.1743	-130.3589	-121.8979	-111.7763	-110.7571	-108.1674	-104.1772	-101.7328	-100.1458	-98.1703	-96.2346	-91.2411	-89.4404	-82.7271	-80.8582	-72.9483	-71.495	-67.8283	-62.5158	-59.1018	-58.0651	-53.3389	-51.1462	-50.4875	-49.0982	-47.0644	-45.6639	-45.1987	-44.4514	-41.9294	-40.1125	-38.6799
680000	24986	0.00632639	-378.8952	-356.1153	-353.2929	-348.5432	-342.0688	-333.6754	-323.7229	-311.7921	-298.4095	-282.9634	-266.1281	-247.1334	-226.778	-204.1569	-180.1862	-153.852	-126.6842	-121.8066	-111.8511	-110.7917	-108.0973	-103.9071	-101.5177	-98.3957	-96.9783	-94.9677	-90.8986	-89.0048	-82.2926	-80.1733	-72.3335	-69.9024	-63.562	-61.6942	-59.0273	-56.8002	-53.2941	-50.669	-50.3936	-48.6077	-46.8744	-45.33	-44.3104	-44.0409	-41.6311	-39.7247	-38.1525
713928	25601	0.00624985	-380.4424	-357.5361	-354.6382	-349.7636	-343.1211	-334.5126	-324.3063	-312.0746	-298.3546	-282.5231	-265.2672	-245.8024	-224.9429	-201.7663	-177.2093	-150.2444	-123.7687	-120.6516	-111.9274	-110.8234	-108.0253	-103.6887	-101.6313	-98.0066	-96.5487	-91.2834	-90.4473	-88.126	-81.8471	-79.3952	-71.6973	-68.6879	-61.0073	-59.321	-58.4382	-54.8683	-53.2613	-50.462	-50.1656	-47.8993	-46.7121	-45.1134	-44.1143	-42.7843	-41.26	-39.2828	-37.7159
750000	26240	0.0061733	-381.9975	-358.962	-355.9855	-350.9811	-344.164	-335.3322	-324.8624	-312.3185	-298.2484	-282.017	-264.325	-244.3727	-222.9905	-199.2382	-174.074	-146.4606	-123.1008	-117.0873	-111.9991	-110.8424	-107.9398	-103.4704	-101.7747	-97.7622	-96.3567	-90.351	-88.8947	-84.9705	-81.3937	-78.4773	-71.0392	-67.5334	-60.1238	-59.1502	-55.6097	-53.2806	-50.9586	-50.3489	-49.9128	-47.0554	-46.5357	-44.8941	-43.8395	-41.7623	-40.7084	-38.7204	-37.3197
784026	26829	0.00610521	-383.3874	-360.2346	-357.1856	-352.0614	-345.0831	-336.0454	-325.3328	-312.501	-298.1083	-281.5086	-263.4147	-243.0134	-221.1499	-196.8676	-171.1453	-142.9417	-123.0727	-113.3205	-112.0257	-110.8022	-107.8292	-103.2623	-101.8978	-97.5946	-96.1575	-90.0737	-88.1988	-81.1823	-80.8186	-77.2499	-70.4283	-66.4847	-59.481	-59.0085	-54.0789	-53.2367	-50.3245	-49.7926	-46.7971	-46.4832	-45.5762	-44.6575	-43.4459	-41.1771	-39.9796	-38.0054	-36.9783
820000	27437	0.00603711	-384.7831	-361.5107	-358.3865	-353.1382	-345.9933	-336.7425	-325.7786	-312.6492	-297.9229	-280.9424	-262.4331	-241.5679	-219.2071	-194.3774	-168.0793	-139.2776	-123.1358	-112.1787	-111.067	-109.1718	-107.4685	-103.025	-101.9817	-97.4652	-95.8985	-89.8127	-87.6209	-80.5828	-78.336	-74.3617	-69.7852	-65.3724	-59.357	-58.3253	-53.3372	-52.6306	-50.2563	-49.649	-46.3255	-45.7911	-44.4518	-43.1206	-41.3836	-40.5422	-38.9053	-36.8554	-36.6246
858837	28080	0.00596768	-386.2125	-362.8157	-359.612	-354.2326	-346.9115	-337.4358	-326.2066	-312.7631	-297.6848	-280.3026	-261.355	-240.0004	-217.1152	-191.7086	-164.8047	-135.3955	-123.2142	-112.2314	-111.0027	-107.9477	-104.7297	-102.7213	-101.74	-97.3627	-95.5477	-89.5465	-87.0281	-80.128	-77.0854	-69.924	-69.0088	-64.059	-59.3811	-57.4414	-53.2885	-51.3593	-50.1827	-49.5096	-46.1663	-45.2824	-44.1701	-42.3204	-40.5411	-39.2995	-36.8995	-36.2467	-34.8666
900000	28745	0.00589824	-387.6478	-364.1242	-360.8379	-355.3226	-347.8188	-338.1101	-326.606	-312.8373	-297.3944	-279.5962	-260.195	-238.334	-214.9061	-188.9029	-161.374	-131.3948	-123.2531	-112.2951	-111.0032	-107.7698	-103.052	-102.5734	-99.1141	-97.2745	-94.9951	-89.2724	-86.3966	-79.6537	-76.1252	-68.4446	-65.4972	-61.9362	-59.4214	-56.4948	-53.2571	-50.1934	-50.0212	-49.3261	-45.9963	-44.9288	-43.8878	-41.3638	-40.1405	-38.7139	-36.0642	-35.4433	-34.7779
948352	29507	0.00582158	-389.2392	-365.5727	-362.1917	-356.5202	-348.807	-338.831	-327.0118	-312.8703	-297.0096	-278.735	-258.8142	-236.3733	-212.3241	-185.6383	-157.3966	-127.0614	-123.0144	-112.3662	-111.0082	-107.6313	-102.7605	-102.5074	-97.2079	-95.8258	-92.7994	-88.9524	-85.5963	-79.0994	-75.1087	-67.5972	-62.998	-59.4633	-57.2309	-55.2951	-53.1778	-50.0303	-49.3591	-48.4416	-45.7715	-44.6094	-43.5826	-40.2706	-39.5753	-38.1703	-35.6411	-34.8853	-34.1043
1000000	30299	0.00574491	-390.8376	-367.0253	-363.5453	-357.7112	-349.7796	-339.5254	-327.3782	-312.8489	-296.5535	-277.7834	-257.3222	-234.2784	-209.5836	-182.1888	-153.2107	-124.6184	-120.6744	-112.4341	-111.0062	-107.4906	-102.8581	-102.2243	-97.1207	-94.8991	-88.6747	-88.127	-84.3571	-78.5055	-74.0619	-66.7087	-61.5013	-59.4783	-54.6513	-53.101	-50.9854	-49.9164	-49.1479	-46.8675	-45.3986	-44.2574	-43.2752	-39.5753	-38.5445	-37.53	-35.2483	-34.8373	-32.9968
1060198	31198	0.00566156	-392.5829	-368.6084	-365.0159	-358.9971	-350.8178	-340.248	-327.7288	-312.7598	-295.9717	-276.6403	-255.5667	-231.8402	-206.4144	-178.2177	-148.4138	-124.341	-115.565	-112.4862	-110.9717	-107.3062	-103.0116	-101.8785	-97.0201	-94.2836	-88.2306	-85.147	-80.3315	-77.7857	-72.7975	-65.678	-60.239	-59.282	-53.9061	-52.4637	-49.8165	-48.9044	-47.0797	-45.3426	-43.9522	-43.0074	-41.9643	-38.9856	-37.5165	-36.2063	-34.8912	-34.729	-31.9373
1125000	32137	0.00557821	-394.3359	-370.1956	-366.4852	-360.2728	-351.8343	-340.9344	-328.0261	-312.5975	-295.2945	-275.3765	-253.6634	-229.2239	-203.035	-174.0025	-143.3514	-124.3984	-112.6568	-111.2417	-109.6364	-106.9236	-103.163	-101.4714	-96.9021	-93.6918	-87.7942	-83.9769	-77.1436	-74.5531	-70.841	-64.5633	-59.8761	-58.1771	-53.6792	-51.4378	-49.6796	-48.5214	-46.059	-44.6942	-43.0077	-42.6064	-38.7805	-37.271	-35.6385	-34.8065	-34.367	-33.1299	-31.3963
1185441	32989	0.0055057	-395.8667	-371.5792	-367.7615	-361.3733	-352.6992	-341.4996	-328.2383	-312.3929	-294.6228	-274.1731	-251.8802	-226.7946	-199.9145	-170.1263	-138.7326	-124.4812	-112.6895	-111.0788	-107.3977	-104.2596	-103.1962	-100.8412	-96.7795	-93.135	-87.3805	-83.1424	-76.4203	-71.8024	-66.5641	-63.4662	-59.8619	-56.8301	-53.6137	-50.5974	-49.5465	-47.9291	-45.6869	-44.2877	-42.3326	-41.8359	-38.251	-36.6341	-34.8045	-33.9489	-33.4652	-31.1728	-30.3113
1250000	33876	0.0054332	-397.403	-372.9653	-369.0357	-362.4642	-353.5448	-342.0333	-328.4045	-312.1255	-293.8695	-272.8668	-249.9711	-224.214	-196.6159	-166.0441	-133.9394	-124.5268	-112.7464	-111.0411	-107.0785	-103.4972	-101.5374	-97.7955	-96.6285	-92.4214	-86.9285	-82.316	-75.6676	-70.4227	-62.7296	-60.5794	-59.7049	-55.1665	-53.5807	-50.0068	-49.399	-46.9573	-45.4253	-43.9644	-41.9865	-40.5964	-37.7497	-36.1388	-34.7508	-33.5313	-31.6934	-30.9209	-29.6811
1310636	34688	0.00536923	-398.7625	-374.1899	-370.1574	-363.4178	-354.2734	-342.4761	-328.5106	-311.8343	-293.1333	-271.6244	-248.1768	-221.8053	-193.5505	-162.2641	-129.6954	-124.394	-112.7976	-111.0118	-106.8971	-103.5915	-101.0196	-96.4895	-93.9396	-90.9062	-86.4877	-81.5454	-74.9595	-69.3776	-61.6016	-59.9966	-56.1971	-53.5714	-52.4298	-49.6432	-49.2599	-45.7988	-45.1978	-43.6913	-41.6692	-39.494	-37.2608	-35.7206	-34.6804	-33.1524	-30.7382	-30.0854	-29.2698
1375000	35529	0.00530527	-400.126	-375.4161	-371.2768	-364.3625	-354.9848	-342.891	-328.5763	-311.4884	-292.3262	-270.2929	-246.2737	-219.2659	-190.3316	-158.3082	-126.4302	-123.1016	-112.8458	-110.9761	-106.7246	-103.6902	-100.6706	-96.3133	-92.4183	-86.91	-85.8729	-80.6327	-74.2022	-68.3479	-60.5415	-60.007	-54.1393	-53.5491	-49.5755	-49.119	-47.5085	-45.0233	-44.0882	-43.3738	-41.3127	-38.4542	-36.6693	-35.3218	-34.556	-32.7638	-30.4118	-28.9665	-28.5773
1435798	36306	0.00524819	-401.3457	-376.5113	-372.2731	-365.1974	-355.6039	-343.2363	-328.5992	-311.1312	-291.5433	-269.026	-244.4793	-216.8846	-187.3239	-154.6245	-125.6938	-119.6307	-112.8809	-110.9311	-106.5635	-103.7721	-100.3843	-96.1341	-91.8053	-85.6683	-82.6273	-79.1935	-73.4737	-67.4019	-60.1007	-59.4924	-53.5298	-52.8735	-49.3288	-48.9806	-45.1717	-44.2769	-42.9757	-41.3555	-40.4092	-37.5872	-35.9201	-34.9872	-34.3518	-32.4049	-30.0601	-28.7075	-27.3761
1500000	37109	0.00519111	-402.5683	-377.6075	-373.2669	-366.0242	-356.2075	-343.5568	-328.5864	-310.7257	-290.698	-267.6809	-242.5896	-214.3891	-184.1823	-150.7904	-125.6056	-115.4581	-112.8722	-110.8447	-106.3782	-103.8443	-100.0967	-95.9306	-91.2975	-85.1712	-80.5167	-75.6393	-72.6403	-66.3828	-60.125	-58.4788	-53.5008	-51.7429	-49.1386	-48.8148	-44.8639	-43.4398	-42.0903	-40.7413	-37.5238	-36.3759	-34.8781	-34.0194	-33.6072	-31.9392	-29.601	-28.4799	-26.5006
1539351	37593	0.00515761	-403.2871	-378.2512	-373.8488	-366.5053	-356.5541	-343.7328	-328.5616	-310.4644	-290.1718	-266.8537	-241.4345	-212.8694	-182.2741	-148.4688	-125.6173	-113.4022	-112.4862	-110.6797	-106.2367	-103.8805	-99.9193	-95.7986	-91.0113	-84.8747	-79.897	-73.2008	-71.8192	-65.7009	-60.1465	-57.8597	-53.4761	-51.1256	-49.0293	-48.6827	-44.7525	-43.1917	-41.4149	-40.4684	-36.9975	-35.7525	-34.6672	-33.7658	-32.1598	-30.582	-29.1894	-28.3401	-26.2146
1580000	38086	0.00512411	-404.0068	-378.8951	-374.4296	-366.9832	-356.8948	-343.8995	-328.5235	-310.1852	-289.6225	-265.9977	-240.2443	-211.3077	-180.3167	-146.094	-125.6453	-113.0957	-111.2628	-109.6272	-106.0105	-103.9107	-99.7261	-95.6564	-90.7254	-84.5687	-79.3932	-72.0676	-69.6517	-64.85	-60.1686	-57.2269	-53.4415	-50.5591	-48.9224	-48.4946	-44.6491	-42.9992	-40.8007	-40.0834	-36.6572	-35.3666	-34.4576	-33.4732	-31.8358	-29.1941	-28.2842	-27.487	-26.0024
1619383	38558	0.00509267	-404.6831	-379.4997	-374.9737	-367.4288	-357.2091	-344.0473	-328.4753	-309.9064	-289.0854	-265.1672	-239.0941	-209.8024	-178.4333	-143.8164	-125.6777	-113.0822	-111.0254	-107.7626	-105.4642	-103.9301	-99.5132	-95.5125	-90.4529	-84.2716	-78.96	-71.5165	-67.4052	-63.6365	-60.189	-56.6207	-53.3939	-50.0991	-48.8264	-48.2322	-44.5542	-42.8371	-40.4029	-39.5165	-36.3925	-35.1203	-34.229	-33.165	-31.6365	-28.78	-28.1202	-26.1391	-25.4875
1660000	39038	0.00506123	-405.3601	-380.1043	-375.5166	-367.8715	-357.5178	-344.1864	-328.4148	-309.6109	-288.5268	-264.3098	-237.9114	-208.258	-176.5044	-141.4928	-125.7104	-113.0919	-110.948	-106.7522	-104.0729	-103.779	-99.2222	-95.3567	-90.1717	-83.9641	-78.5424	-71.0151	-65.8197	-61.6468	-60.2083	-55.9991	-53.3201	-49.7312	-48.734	-47.8566	-44.4595	-42.6816	-40.1204	-38.816	-36.1581	-34.9363	-33.9804	-32.8268	-31.4564	-28.4325	-27.9528	-25.9242	-24.7527
1704257	39555	0.00502804	-406.0754	-380.7426	-376.0885	-368.3352	-357.8374	-344.3235	-328.3371	-309.2804	-287.9133	-263.3751	-236.6267	-206.5847	-174.4181	-138.9933	-125.7393	-113.1086	-110.8967	-106.4172	-103.9807	-101.7133	-98.6294	-95.1739	-89.8573	-83.6274	-78.1072	-70.4894	-64.7834	-60.2289	-58.9152	-55.3023	-53.1811	-49.4397	-48.6372	-47.3298	-44.3583	-42.5191	-39.8582	-38.0263	-35.9354	-34.7699	-33.7142	-32.4414	-31.2733	-28.1413	-27.6877	-25.8105	-24.2441
1750000	40082	0.00499486	-406.7915	-381.381	-376.659	-368.7954	-358.1505	-344.4504	-328.2448	-308.9304	-287.2747	-262.4088	-235.3037	-204.8654	-172.2783	-136.4521	-125.7532	-113.1276	-110.8542	-106.2561	-103.9798	-100.2639	-97.1408	-94.9455	-89.5065	-83.2772	-77.6705	-69.9557	-64.0107	-60.2444	-56.2944	-54.3953	-52.8375	-49.2101	-48.5366	-46.6774	-44.254	-42.3548	-39.6015	-37.2232	-35.7326	-34.6051	-33.4533	-32.031	-31.0914	-27.9461	-27.3065	-25.7134	-23.8293
1757174	40164	0.00498975	-406.9018	-381.4793	-376.7466	-368.8658	-358.1981	-344.4689	-328.2293	-308.8747	-287.1741	-262.2573	-235.0966	-204.5968	-171.9442	-136.0582	-125.753	-113.1306	-110.848	-106.2369	-103.9792	-100.1365	-96.8205	-94.8986	-89.447	-83.222	-77.6028	-69.8726	-63.9022	-60.2465	-55.9841	-54.2091	-52.73	-49.1765	-48.5203	-46.5652	-44.2375	-42.3293	-39.5616	-37.1001	-35.7025	-34.5787	-33.4137	-31.9658	-31.0633	-27.9211	-27.2412	-25.6989	-23.7696
1764389	40247	0.00498465	-407.0121	-381.5775	-376.8343	-368.9363	-358.2455	-344.4873	-328.2134	-308.8186	-287.0729	-262.1049	-234.8885	-204.3268	-171.6087	-135.6636	-125.752	-113.1336	-110.8418	-106.2187	-103.9784	-100.0272	-96.4894	-94.8435	-89.3853	-83.1664	-77.5348	-69.7891	-63.7955	-60.2485	-55.7151	-54.0139	-52.5903	-49.1425	-48.5037	-46.4493	-44.2208	-42.3036	-39.5216	-36.9774	-35.6725	-34.5519	-33.3742	-31.9001	-31.035	-27.8967	-27.1747	-25.6845	-23.7106
1778927	40412	0.00497443	-407.2328	-381.7741	-377.0095	-369.0768	-358.3399	-344.5232	-328.1806	-308.7049	-286.8686	-261.7979	-234.4696	-203.7837	-170.9338	-134.8735	-125.7469	-113.1397	-110.8295	-106.1846	-103.9762	-99.8503	-95.8363	-94.6831	-89.2538	-83.0541	-77.3983	-69.6212	-63.5865	-60.252	-55.2973	-53.6429	-52.1789	-49.0707	-48.4692	-46.2051	-44.1866	-42.2519	-39.4408	-36.734	-35.612	-34.4971	-33.2956	-31.767	-30.9782	-27.8496	-27.039	-25.6557	-23.5947
1793615	40579	0.00496422	-407.4535	-381.9706	-377.1846	-369.217	-358.4336	-344.5581	-328.1463	-308.5892	-286.6618	-261.4877	-234.0468	-203.236	-170.2537	-134.0829	-125.7365	-113.1457	-110.8172	-106.1532	-103.9731	-99.7123	-95.316	-94.3556	-89.1082	-82.9402	-77.2607	-69.4521	-63.3824	-60.2549	-55.0036	-53.3538	-51.5837	-48.9878	-48.4317	-45.9407	-44.1511	-42.1997	-39.3589	-36.4949	-35.5496	-34.4403	-33.2174	-31.6317	-30.9209	-27.804	-26.9004	-25.6268	-23.4813
1808455	40746	0.004954	-407.6743	-382.1672	-377.3595	-369.3568	-358.5266	-344.592	-328.1105	-308.4715	-286.4525	-261.1744	-233.6203	-202.6837	-169.5683	-133.2936	-125.7193	-113.1516	-110.805	-106.124	-103.969	-99.5997	-95.0364	-93.7736	-88.9424	-82.8245	-77.1219	-69.2815	-63.1821	-60.2569	-54.7884	-53.1363	-50.8869	-48.8797	-48.3882	-45.6498	-44.1133	-42.147	-39.2759	-36.2635	-35.4821	-34.3813	-33.1394	-31.4941	-30.8631	-27.7591	-26.7598	-25.5977	-23.3702
1823601	40917	0.00494368	-407.8975	-382.3657	-377.536	-369.4977	-358.6199	-344.6251	-328.0729	-308.3507	-286.2385	-260.8547	-233.1855	-202.1212	-168.8705	-132.5001	-125.6923	-113.1576	-110.7925	-106.0963	-103.9638	-99.503	-94.8894	-93.0557	-88.7445	-82.7058	-76.9802	-69.1079	-62.983	-60.2581	-54.6218	-52.9506	-50.2031	-48.7154	-48.3253	-45.32	-44.0707	-42.0931	-39.1904	-36.0437	-35.4025	-34.3193	-33.0607	-31.3527	-30.8038	-27.7142	-26.6165	-25.5677	-23.2601
1838906	41088	0.00493336	-408.1206	-382.5642	-377.7124	-369.6382	-358.7125	-344.6572	-328.0337	-308.2278	-286.0219	-260.5317	-232.7467	-201.5539	-168.1673	-131.7143	-125.6518	-113.1635	-110.78	-106.0702	-103.9576	-99.4182	-94.7875	-92.3192	-88.501	-82.5848	-76.8366	-68.9328	-62.7867	-60.258	-54.49	-52.7757	-49.6769	-48.4966	-48.1629	-44.9433	-44.0171	-42.0386	-39.1032	-35.8488	-35.3006	-34.2547	-32.9817	-31.2088	-30.7438	-27.6691	-26.4725	-25.5371	-23.1519
1854372	41260	0.00492304	-408.3439	-382.7627	-377.8887	-369.7782	-358.8045	-344.6882	-327.9931	-308.1029	-285.8026	-260.2055	-232.3039	-200.9819	-167.4585	-130.9422	-125.592	-113.1693	-110.7673	-106.0454	-103.9503	-99.3416	-94.7022	-91.6194	-88.1895	-82.4614	-76.6909	-68.7562	-62.5928	-60.2563	-54.3839	-52.6009	-49.3739	-48.373	-47.7298	-44.5254	-43.9245	-41.9832	-39.0138	-35.6925	-35.1626	-34.1872	-32.9023	-31.0622	-30.6828	-27.6237	-26.3286	-25.5053	-23.0455
1862165	41347	0.00491788	-408.4555	-382.862	-377.9767	-369.8481	-358.8502	-344.7033	-327.9721	-308.0396	-285.692	-260.0411	-232.081	-200.6941	-167.102	-130.5639	-125.5521	-113.1721	-110.7609	-106.0335	-103.9462	-99.3056	-94.6625	-91.2962	-87.9998	-82.3986	-76.6172	-68.6673	-62.4969	-60.2548	-54.3385	-52.5121	-49.2823	-48.3394	-47.4544	-44.3303	-43.8271	-41.9551	-38.9681	-35.6307	-35.0781	-34.1524	-32.8623	-30.9877	-30.6519	-27.6007	-26.2569	-25.4888	-22.9931
1870000	41434	0.00491273	-408.5672	-382.9613	-378.0647	-369.9179	-358.8957	-344.7181	-327.9508	-307.9759	-285.5807	-259.8759	-231.8571	-200.405	-166.7442	-130.1928	-125.5035	-113.1749	-110.7544	-106.0219	-103.9418	-99.271	-94.624	-90.9964	-87.7829	-82.335	-76.5427	-68.578	-62.4015	-60.2527	-54.2975	-52.4221	-49.2138	-48.3118	-47.1739	-44.1876	-43.6493	-41.9267	-38.9216	-35.5787	-34.9846	-34.1166	-32.8221	-30.9125	-30.6207	-27.5775	-26.1856	-25.4718	-22.941
1877771	41520	0.00490763	-408.6774	-383.0592	-378.1515	-369.9867	-358.9404	-344.7324	-327.9294	-307.9124	-285.4702	-259.712	-231.6352	-200.1187	-166.3897	-129.8356	-125.4452	-113.1776	-110.748	-106.0107	-103.9372	-99.2378	-94.5868	-90.7266	-87.5401	-82.2713	-76.4685	-68.4895	-62.3081	-60.2501	-54.2608	-52.332	-49.1609	-48.2873	-46.905	-44.105	-43.3878	-41.8983	-38.8749	-35.5351	-34.8851	-34.0804	-32.7821	-30.8375	-30.5896	-27.5544	-26.1157	-25.4544	-22.8901
1885583	41606	0.00490254	-408.7876	-383.1571	-378.2383	-370.0554	-358.985	-344.7465	-327.9076	-307.8485	-285.3591	-259.5474	-231.4122	-199.8311	-166.0338	-129.4897	-125.3743	-113.1803	-110.7415	-105.9997	-103.9323	-99.2056	-94.55	-90.4843	-87.2675	-82.2066	-76.3934	-68.4007	-62.2154	-60.2467	-54.2274	-52.2406	-49.1177	-48.2641	-46.6505	-44.0548	-43.0667	-41.8694	-38.8271	-35.4974	-34.7803	-34.0431	-32.7418	-30.7617	-30.5582	-27.531	-26.0464	-25.4363	-22.8397
1901328	41779	0.00489236	-409.0081	-383.353	-378.4118	-370.1924	-359.0736	-344.7738	-327.8629	-307.719	-285.1348	-259.2156	-230.9634	-199.2523	-165.3179	-128.8433	-125.1828	-113.1856	-110.7283	-105.9785	-103.9216	-99.1436	-94.4776	-90.0796	-86.638	-82.0734	-76.2405	-68.2217	-62.0323	-60.2376	-54.1693	-52.0542	-49.049	-48.2194	-46.1937	-43.9909	-42.3188	-41.8064	-38.7274	-35.4344	-34.5605	-33.9645	-32.6598	-30.6072	-30.4944	-27.4833	-25.911	-25.3967	-22.74
1905293	41823	0.00488982	-409.0632	-383.402	-378.4551	-370.2266	-359.0956	-344.7805	-327.8515	-307.6863	-285.0783	-259.132	-230.8504	-199.1068	-165.138	-128.6935	-125.1221	-113.1868	-110.7249	-105.9733	-103.9187	-99.1285	-94.4595	-89.9936	-86.4648	-82.0391	-76.2016	-68.1767	-61.987	-60.2346	-54.1563	-52.0068	-49.0344	-48.2083	-46.0901	-43.9781	-42.12	-41.7857	-38.7013	-35.4204	-34.5042	-33.9437	-32.639	-30.568	-30.4782	-27.4711	-25.8779	-25.3859	-22.7154
1907278	41845	0.00488854	-409.0908	-383.4265	-378.4768	-370.2437	-359.1066	-344.7838	-327.8457	-307.6699	-285.05	-259.0902	-230.7939	-199.034	-165.0479	-128.6207	-125.0896	-113.1875	-110.7233	-105.9708	-103.9173	-99.121	-94.4506	-89.9526	-86.3762	-82.0218	-76.1821	-68.1541	-61.9645	-60.2331	-54.15	-51.9831	-49.0274	-48.2027	-46.0398	-43.972	-42.0225	-41.7717	-38.6881	-35.4136	-34.476	-33.9331	-32.6285	-30.5483	-30.4701	-27.465	-25.8616	-25.3804	-22.7031
1909265	41867	0.00488727	-409.1184	-383.451	-378.4984	-370.2608	-359.1176	-344.7871	-327.8399	-307.6535	-285.0216	-259.0484	-230.7373	-198.9611	-164.9578	-128.5494	-125.0555	-113.1881	-110.7216	-105.9682	-103.9158	-99.1135	-94.4416	-89.9129	-86.2864	-82.0044	-76.1624	-68.1316	-61.9421	-60.2315	-54.1439	-51.9592	-49.0205	-48.1972	-45.9905	-43.966	-41.9313	-41.7503	-38.6747	-35.4069	-34.4478	-33.9223	-32.618	-30.5285	-30.462	-27.4588	-25.8454	-25.3747	-22.6909
1911255	41888	0.004886	-409.1459	-383.4755	-378.5201	-370.2779	-359.1286	-344.7904	-327.8341	-307.6371	-284.9933	-259.0064	-230.6807	-198.8881	-164.8676	-128.4796	-125.0198	-113.1887	-110.7199	-105.9657	-103.9143	-99.1061	-94.4326	-89.8745	-86.1953	-81.9868	-76.1427	-68.109	-61.9197	-60.2297	-54.1378	-51.9354	-49.0138	-48.1916	-45.9421	-43.9602	-41.8578	-41.71	-38.6611	-35.4004	-34.4196	-33.9113	-32.6075	-30.5087	-30.4538	-27.4526	-25.8293	-25.3689	-22.6786
1913247	41910	0.00488473	-409.1735	-383.4999	-378.5418	-370.295	-359.1396	-344.7936	-327.8283	-307.6206	-284.9648	-258.9645	-230.624	-198.8151	-164.7773	-128.4115	-124.9825	-113.1893	-110.7182	-105.9632	-103.9128	-99.0987	-94.4236	-89.8372	-86.103	-81.9691	-76.1229	-68.0864	-61.8974	-60.228	-54.132	-51.9114	-49.0072	-48.186	-45.8947	-43.9544	-41.8144	-41.6388	-38.6473	-35.3939	-34.3914	-33.9002	-32.5969	-30.4888	-30.4456	-27.4464	-25.8133	-25.3629	-22.6664
1915242	41932	0.00488345	-409.2011	-383.5244	-378.5634	-370.312	-359.1505	-344.7968	-327.8225	-307.6041	-284.9364	-258.9225	-230.5672	-198.7419	-164.6869	-128.3449	-124.9434	-113.1899	-110.7165	-105.9606	-103.9112	-99.0914	-94.4146	-89.8011	-86.0097	-81.9513	-76.1031	-68.0637	-61.8752	-60.2261	-54.1262	-51.8874	-49.0008	-48.1805	-45.848	-43.9488	-41.7916	-41.546	-38.6333	-35.3875	-34.3632	-33.8889	-32.5862	-30.4689	-30.4374	-27.4402	-25.7975	-25.3568	-22.6543
1917238	41954	0.00488218	-409.2286	-383.5489	-378.585	-370.3291	-359.1615	-344.8001	-327.8166	-307.5875	-284.9079	-258.8804	-230.5104	-198.6688	-164.5965	-128.28	-124.9026	-113.1906	-110.7148	-105.9581	-103.9097	-99.0841	-94.4057	-89.766	-85.9153	-81.9333	-76.0831	-68.0411	-61.853	-60.2241	-54.1206	-51.8634	-48.9945	-48.1749	-45.8023	-43.9433	-41.777	-41.4443	-38.6191	-35.3812	-34.335	-33.8773	-32.5755	-30.4489	-30.4291	-27.434	-25.7819	-25.3506	-22.6421
1925256	42042	0.00487709	-409.3389	-383.6468	-378.6716	-370.3972	-359.2051	-344.8128	-327.7929	-307.521	-284.7934	-258.7116	-230.2824	-198.3752	-164.2337	-128.0377	-124.7212	-113.193	-110.708	-105.9482	-103.9032	-99.0551	-94.3697	-89.6357	-85.5285	-81.8597	-76.0024	-67.9501	-61.7652	-60.2154	-54.0991	-51.7667	-48.9705	-48.1523	-45.6269	-43.9218	-41.7381	-41.011	-38.5595	-35.3568	-34.2234	-33.8281	-32.5322	-30.396	-30.3679	-27.4087	-25.7211	-25.3238	-22.5938
1933315	42129	0.004872	-409.4492	-383.7447	-378.7582	-370.4653	-359.2486	-344.8252	-327.7688	-307.4539	-284.6783	-258.542	-230.0534	-198.0804	-163.8695	-127.8243	-124.5094	-113.1953	-110.701	-105.9385	-103.8965	-99.0265	-94.3338	-89.519	-85.13	-81.7827	-75.9202	-67.8587	-61.6789	-60.205	-54.0794	-51.6692	-48.9481	-48.1294	-45.4625	-43.901	-41.706	-40.5654	-38.4937	-35.3332	-34.1153	-33.7724	-32.4878	-30.3624	-30.2858	-27.3828	-25.6637	-25.2935	-22.5459
1949722	42308	0.00486172	-409.672	-383.9425	-378.9328	-370.6025	-359.3359	-344.8494	-327.7188	-307.3168	-284.4436	-258.1967	-229.5878	-197.4812	-163.1297	-127.4815	-123.9896	-113.1997	-110.6866	-105.9194	-103.8819	-98.9699	-94.2609	-89.3154	-84.3052	-81.6121	-75.7483	-67.6727	-61.51	-60.1778	-54.044	-51.4706	-48.9062	-48.0818	-45.1576	-43.8603	-41.6438	-39.6796	-38.3211	-35.2863	-33.922	-33.6246	-32.3943	-30.2931	-30.1157	-27.3289	-25.5612	-25.2191	-22.4505
1966304	42487	0.00485144	-409.8949	-384.1403	-379.1073	-370.7393	-359.4225	-344.8725	-327.6673	-307.1776	-284.2062	-257.848	-229.1179	-196.877	-162.384	-127.2421	-123.3611	-113.2037	-110.6718	-105.9009	-103.866	-98.9144	-94.1875	-89.1425	-83.4845	-81.4053	-75.5669	-67.4849	-61.3509	-60.1397	-54.0136	-51.2703	-48.8677	-48.0319	-44.8805	-43.8197	-41.5816	-38.9435	-37.9916	-35.2376	-33.7783	-33.4098	-32.2928	-30.2219	-29.9388	-27.2721	-25.4794	-25.1241	-22.3567
1983063	42668	0.00484115	-410.1179	-384.3381	-379.2816	-370.8756	-359.5083	-344.8945	-327.6141	-307.0361	-283.966	-257.4957	-228.6437	-196.2677	-161.6325	-127.0799	-122.6503	-113.2072	-110.6565	-105.883	-103.8488	-98.8599	-94.1134	-88.9901	-82.7244	-81.1195	-75.3728	-67.2949	-61.205	-60.0872	-53.9872	-51.0693	-48.8314	-47.9792	-44.6245	-43.7782	-41.5187	-38.5475	-37.3464	-35.1811	-33.6685	-33.1378	-32.1774	-30.1486	-29.7533	-27.2118	-25.416	-25.0108	-22.2646
2000000	42850	0.00483087	-410.3409	-384.5358	-379.4558	-371.0116	-359.5934	-344.9152	-327.5593	-306.8924	-283.7229	-257.1399	-228.1652	-195.6533	-160.8752	-126.9706	-121.8818	-113.21	-110.6405	-105.8654	-103.8302	-98.8061	-94.0385	-88.8519	-82.1176	-80.6741	-75.1611	-67.1029	-61.0763	-60.016	-53.964	-50.8687	-48.7966	-47.9232	-44.386	-43.734	-41.4545	-38.3509	-36.5718	-35.1024	-33.5717	-32.8252	-32.0328	-30.0727	-29.5558	-27.1471	-25.365	-24.8852	-22.1741
2014502	43005	0.00482215	-410.5301	-384.7035	-379.6033	-371.1265	-359.6649	-344.9319	-327.5114	-306.7689	-283.5146	-256.8355	-227.7562	-195.1283	-160.2285	-126.9062	-121.1987	-113.2117	-110.6263	-105.8508	-103.8134	-98.7609	-93.9744	-88.7425	-81.7656	-80.1376	-74.9627	-66.9382	-60.983	-59.9384	-53.9465	-50.6996	-48.7679	-47.8725	-44.1972	-43.6919	-41.399	-38.2295	-35.9848	-34.9865	-33.4933	-32.5467	-31.8564	-30.0063	-29.375	-27.0879	-25.3277	-24.7729	-22.0985
2029136	43161	0.00481344	-410.7192	-384.8711	-379.7507	-371.2411	-359.7358	-344.9477	-327.4624	-306.6437	-283.3041	-256.5285	-227.344	-194.5996	-159.5775	-126.8598	-120.4949	-113.2125	-110.6114	-105.8362	-103.7955	-98.7159	-93.9095	-88.6385	-81.5223	-79.5047	-74.7403	-66.7718	-60.9054	-59.8438	-53.9307	-50.532	-48.7396	-47.8186	-44.0239	-43.6409	-41.3424	-38.1221	-35.5776	-34.7629	-33.416	-32.2982	-31.576	-29.9374	-29.175	-27.0232	-25.2935	-24.6571	-22.024
2058804	43475	0.004796	-411.0977	-385.2063	-380.0451	-371.4693	-359.876	-344.9767	-327.3607	-306.3885	-282.877	-255.9066	-226.5101	-193.5309	-158.2627	-126.8027	-119.0456	-113.2105	-110.579	-105.8071	-103.7568	-98.6264	-93.7778	-88.4417	-81.1786	-78.1781	-74.184	-66.4328	-60.7938	-59.6061	-53.903	-50.2045	-48.6834	-47.6987	-43.7646	-43.4679	-41.2255	-37.9217	-35.2778	-34.0908	-33.2612	-31.97	-30.6608	-29.7879	-28.6624	-26.8671	-25.23	-24.4188	-21.8778
2089129	43794	0.0047785	-411.4777	-385.5428	-380.34	-371.697	-360.0145	-345.0023	-327.2537	-306.1256	-282.4398	-255.2717	-225.6603	-192.4429	-156.9257	-126.7752	-117.5602	-113.1992	-110.5413	-105.7768	-103.7137	-98.5364	-93.6426	-88.254	-80.9003	-76.9904	-73.3845	-66.0826	-60.7266	-59.315	-53.8794	-49.8916	-48.626	-47.5583	-43.6372	-43.1796	-41.1023	-37.7249	-35.1747	-33.5523	-33.1031	-31.736	-29.7882	-29.5435	-27.8369	-26.6124	-25.1678	-24.1696	-21.7339
2120000	44117	0.004761	-411.8579	-385.8791	-380.6344	-371.9235	-360.1506	-345.0243	-327.1415	-305.8559	-281.9939	-254.6261	-224.7973	-191.3393	-155.571	-126.7654	-116.0764	-113.1646	-110.4942	-105.7436	-103.6661	-98.4456	-93.5043	-88.0722	-80.6427	-76.0879	-72.2576	-65.719	-60.6871	-58.9861	-53.8588	-49.602	-48.5657	-47.3922	-43.555	-42.8622	-40.9723	-37.5265	-35.1058	-33.1774	-32.9405	-31.5197	-29.5299	-29.0129	-26.9912	-25.8605	-25.0947	-23.8925	-21.5909
2135672	44279	0.00475225	-412.0481	-386.0473	-380.7813	-372.0362	-360.2177	-345.034	-327.0835	-305.7185	-281.7676	-254.2992	-224.3608	-190.7816	-154.887	-126.7649	-115.355	-113.1247	-110.4644	-105.725	-103.6405	-98.3996	-93.4339	-87.9827	-80.517	-75.7425	-71.5807	-65.5302	-60.6738	-58.8106	-53.8494	-49.4683	-48.5338	-47.2977	-43.5185	-42.7047	-40.9043	-37.426	-35.0753	-33.0299	-32.857	-31.4132	-29.4421	-28.7931	-26.7789	-25.2615	-24.9812	-23.7161	-21.5183
2151474	44443	0.0047435	-412.2382	-386.2154	-380.9282	-372.1486	-360.2843	-345.0427	-327.0242	-305.5794	-281.5392	-253.9695	-223.9209	-190.2199	-154.1986	-126.7665	-114.677	-113.0447	-110.4275	-105.7045	-103.6137	-98.3531	-93.3627	-87.8938	-80.3923	-75.4509	-70.8488	-65.335	-60.6634	-58.6284	-53.8406	-49.3435	-48.5004	-47.1947	-43.4833	-42.5497	-40.8341	-37.3245	-35.0458	-32.9016	-32.7717	-31.3072	-29.3556	-28.6015	-26.6275	-25.0893	-24.4388	-23.4427	-21.4426
2167422	44607	0.00473475	-412.4285	-386.3836	-381.0748	-372.2606	-360.3502	-345.0505	-326.9636	-305.4385	-281.3085	-253.637	-223.4777	-189.6542	-153.5057	-126.7699	-114.1062	-112.8669	-110.3784	-105.6812	-103.5856	-98.3059	-93.2906	-87.8054	-80.268	-75.1996	-70.0789	-65.1314	-60.655	-58.4398	-53.8321	-49.2282	-48.465	-47.0827	-43.4488	-42.398	-40.7615	-37.2221	-35.0166	-32.7884	-32.6845	-31.2019	-29.2684	-28.4294	-26.4948	-25.0457	-23.9775	-22.9314	-21.359
2183518	44773	0.004726	-412.6187	-386.5517	-381.2214	-372.3722	-360.4156	-345.0573	-326.9017	-305.2959	-281.0755	-253.3017	-223.0311	-189.0844	-152.8083	-126.7748	-113.7416	-112.504	-110.3074	-105.6539	-103.556	-98.258	-93.2176	-87.7171	-80.1439	-74.9773	-69.2867	-64.9161	-60.6481	-58.2445	-53.824	-49.1229	-48.4275	-46.9615	-43.4147	-42.25	-40.6865	-37.1187	-34.9873	-32.6873	-32.5955	-31.0975	-29.1799	-28.2718	-26.3658	-25.0115	-23.7274	-22.228	-21.2483
2199905	44940	0.00471717	-412.8107	-386.7212	-381.369	-372.4845	-360.4808	-345.0632	-326.8379	-305.1502	-280.8382	-252.9606	-222.5772	-188.5056	-152.1003	-126.7808	-113.5708	-111.9871	-110.1912	-105.6208	-103.5245	-98.2085	-93.1431	-87.6283	-80.0187	-74.7745	-68.4802	-64.6816	-60.6419	-58.0402	-53.8161	-49.0273	-48.3874	-46.8297	-43.3805	-42.1046	-40.608	-37.0135	-34.9572	-32.5946	-32.5044	-30.9933	-29.089	-28.1246	-26.2331	-24.9791	-23.5594	-21.6042	-21.003
2216447	45109	0.00470835	-413.0026	-386.8907	-381.5165	-372.5965	-360.5455	-345.0682	-326.7727	-305.0027	-280.5986	-252.6167	-222.1197	-187.9225	-151.3877	-126.7878	-113.4946	-111.4734	-109.9818	-105.5792	-103.4911	-98.1579	-93.0676	-87.5394	-79.8931	-74.587	-67.6829	-64.4209	-60.6358	-57.8278	-53.8085	-48.9422	-48.3447	-46.6885	-43.3464	-41.9634	-40.5266	-36.9076	-34.926	-32.5089	-32.4125	-30.8905	-28.9964	-27.9874	-26.095	-24.9472	-23.4205	-21.3364	-20.4681
2233145	45279	0.00469952	-413.1947	-387.0602	-381.6639	-372.708	-360.6095	-345.0722	-326.7061	-304.8533	-280.3566	-252.2698	-221.6587	-187.3353	-150.6705	-126.7955	-113.4564	-111.0911	-109.6131	-105.5251	-103.4553	-98.1056	-92.9912	-87.4503	-79.7671	-74.4107	-66.9161	-64.1193	-60.629	-57.6057	-53.8012	-48.8671	-48.2998	-46.5382	-43.3122	-41.8265	-40.4422	-36.8012	-34.8936	-32.4288	-32.3199	-30.7893	-28.9022	-27.859	-25.9501	-24.9152	-23.2941	-21.223	-20.0377
2250000	45449	0.0046907	-413.3867	-387.2297	-381.8111	-372.8192	-360.6728	-345.0752	-326.6382	-304.7021	-280.1123	-251.9199	-221.1941	-186.7439	-149.9487	-126.8038	-113.4351	-110.8678	-109.0866	-105.4512	-103.4165	-98.0515	-92.9138	-87.361	-79.6406	-74.2426	-66.2082	-63.755	-60.6204	-57.372	-53.7939	-48.8011	-48.2529	-46.3794	-43.278	-41.6941	-40.3546	-36.6946	-34.8594	-32.3533	-32.2263	-30.6897	-28.8065	-27.7384	-25.7981	-24.8827	-23.1741	-21.141	-19.872
2279203	45743	0.0046756	-413.7153	-387.5196	-382.0625	-373.0085	-360.7797	-345.078	-326.5187	-304.4391	-279.6887	-251.3146	-220.391	-185.7222	-148.7034	-126.8189	-113.4168	-110.6867	-108.054	-105.2403	-103.3391	-97.9528	-92.779	-87.2073	-79.4229	-73.9685	-65.2201	-62.9224	-60.5939	-56.9367	-53.7818	-48.7061	-48.1693	-46.0897	-43.2189	-41.4779	-40.1975	-36.5126	-34.7958	-32.2334	-32.0627	-30.5236	-28.6395	-27.5472	-25.5221	-24.8252	-22.9773	-21.0202	-19.666
2308881	46040	0.0046605	-414.044	-387.8094	-382.3134	-373.1968	-360.8846	-345.0779	-326.3951	-304.1706	-279.2582	-250.7005	-219.5772	-184.6879	-147.4446	-126.8348	-113.4093	-110.5977	-107.1538	-104.8175	-103.2318	-97.8431	-92.6408	-87.0518	-79.203	-73.7054	-64.5343	-61.8725	-60.5129	-56.4353	-53.7698	-48.6286	-48.0838	-45.7801	-43.1592	-41.2742	-40.0312	-36.3332	-34.7237	-32.123	-31.8936	-30.3628	-28.4695	-27.3711	-25.2308	-24.762	-22.7866	-20.9081	-19.4715
2313902	46090	0.00465797	-414.0991	-387.8579	-382.3554	-373.2282	-360.902	-345.0775	-326.3739	-304.1251	-279.1853	-250.5967	-219.4398	-184.5133	-147.2323	-126.8374	-113.4087	-110.5865	-107.0343	-104.717	-103.2076	-97.8232	-92.6173	-87.0256	-79.166	-73.662	-64.4411	-61.697	-60.483	-56.3423	-53.7678	-48.6169	-48.0694	-45.7264	-43.1491	-41.2413	-40.0024	-36.3035	-34.7106	-32.1053	-31.8646	-30.3363	-28.4408	-27.3427	-25.1813	-24.7502	-22.755	-20.8898	-19.4392
2318936	46140	0.00465544	-414.1542	-387.9065	-382.3974	-373.2596	-360.9194	-345.0771	-326.3527	-304.0794	-279.1122	-250.4926	-219.3021	-184.3384	-147.0197	-126.8401	-113.4081	-110.576	-106.9254	-104.6082	-103.1803	-97.8028	-92.5937	-86.9993	-79.1289	-73.6189	-64.3524	-61.5299	-60.4428	-56.2461	-53.7658	-48.6055	-48.055	-45.6723	-43.139	-41.2086	-39.9735	-36.2741	-34.6972	-32.0878	-31.8355	-30.31	-28.412	-27.3146	-25.1318	-24.7379	-22.7235	-20.8715	-19.407
2323974	46190	0.00465291	-414.2091	-387.9549	-382.4393	-373.2909	-360.9366	-345.0767	-326.3314	-304.0336	-279.0391	-250.3886	-219.1643	-184.1634	-146.8071	-126.8428	-113.4077	-110.5662	-106.8274	-104.4924	-103.149	-97.7819	-92.5701	-86.9729	-79.0917	-73.5759	-64.2677	-61.376	-60.3884	-56.1466	-53.7638	-48.5945	-48.0407	-45.6179	-43.1289	-41.1764	-39.9443	-36.2448	-34.6834	-32.0706	-31.8063	-30.2839	-28.3833	-27.2867	-25.0828	-24.7249	-22.6921	-20.8533	-19.3749
2329045	46241	0.00465038	-414.2643	-388.0036	-382.4813	-373.3223	-360.9539	-345.0761	-326.3098	-303.9875	-278.9655	-250.2838	-219.0257	-183.9875	-146.5933	-126.8455	-113.4074	-110.5568	-106.7394	-104.3707	-103.1124	-97.7602	-92.5462	-86.9464	-79.0544	-73.533	-64.1861	-61.2401	-60.3149	-56.043	-53.7617	-48.5836	-48.0263	-45.5628	-43.1187	-41.1443	-39.9148	-36.2156	-34.6693	-32.0534	-31.7767	-30.2578	-28.3544	-27.259	-25.0341	-24.7107	-22.6607	-20.8351	-19.3427
2334100	46291	0.00464786	-414.3192	-388.0519	-382.5231	-373.3535	-360.971	-345.0754	-326.2883	-303.9415	-278.8922	-250.1795	-218.8877	-183.8121	-146.3804	-126.8481	-113.4071	-110.5479	-106.6615	-104.2465	-103.069	-97.738	-92.5224	-86.92	-79.0173	-73.4904	-64.1078	-61.1278	-60.2194	-55.936	-53.7597	-48.5731	-48.0121	-45.5076	-43.1086	-41.1127	-39.8853	-36.1868	-34.6549	-32.0365	-31.7472	-30.232	-28.3257	-27.2316	-24.9867	-24.6953	-22.6295	-20.8171	-19.3107
2339191	46341	0.00464533	-414.3743	-388.1005	-382.5651	-373.3848	-360.9881	-345.0747	-326.2666	-303.8952	-278.8183	-250.0744	-218.7487	-183.6357	-146.1662	-126.8507	-113.407	-110.5393	-106.5923	-104.1218	-103.0165	-97.7149	-92.4983	-86.8933	-78.9799	-73.4477	-64.0318	-61.0392	-60.1004	-55.8241	-53.7576	-48.5628	-47.9978	-45.4517	-43.0983	-41.0812	-39.8554	-36.1581	-34.64	-32.0197	-31.7173	-30.2062	-28.2968	-27.2043	-24.9405	-24.678	-22.5983	-20.7991	-19.2785
2344292	46392	0.0046428	-414.4294	-388.149	-382.607	-373.416	-361.0052	-345.0739	-326.2448	-303.8487	-278.7442	-249.9691	-218.6095	-183.459	-145.9518	-126.8534	-113.4069	-110.5312	-106.5312	-104.0008	-102.9522	-97.691	-92.4742	-86.8666	-78.9424	-73.4052	-63.9581	-60.9726	-59.9613	-55.7077	-53.7555	-48.5527	-47.9835	-45.3955	-43.0881	-41.05	-39.8254	-36.1297	-34.6248	-32.0031	-31.6872	-30.1805	-28.268	-27.1772	-24.8965	-24.658	-22.5671	-20.7811	-19.2465
2349409	46442	0.00464027	-414.4845	-388.1975	-382.6489	-373.4472	-361.0222	-345.073	-326.2228	-303.8021	-278.6699	-249.8636	-218.4699	-183.2819	-145.737	-126.856	-113.4069	-110.5233	-106.4773	-103.8872	-102.8734	-97.6662	-92.4499	-86.8398	-78.9049	-73.3628	-63.8863	-60.9236	-59.8069	-55.5861	-53.7534	-48.5428	-47.9693	-45.3388	-43.0778	-41.0191	-39.7951	-36.1015	-34.6091	-31.9867	-31.6569	-30.155	-28.2391	-27.1501	-24.8557	-24.6346	-22.536	-20.7632	-19.2145
2354533	46493	0.00463774	-414.5396	-388.246	-382.6907	-373.4784	-361.0391	-345.072	-326.2008	-303.7553	-278.5956	-249.7579	-218.3302	-183.1047	-145.522	-126.8586	-113.4069	-110.5157	-106.4298	-103.7846	-102.7778	-97.6403	-92.4255	-86.8129	-78.8674	-73.3205	-63.8163	-60.8876	-59.6429	-55.4594	-53.7513	-48.5331	-47.9551	-45.2818	-43.0675	-40.9885	-39.7646	-36.0736	-34.5931	-31.9704	-31.6265	-30.1296	-28.2103	-27.1232	-24.8188	-24.6068	-22.5049	-20.7453	-19.1825
2359685	46544	0.00463521	-414.5947	-388.2946	-382.7326	-373.5095	-361.056	-345.0709	-326.1785	-303.7083	-278.5208	-249.6517	-218.1899	-182.9266	-145.3062	-126.8612	-113.4071	-110.5083	-106.3877	-103.6949	-102.6637	-97.6132	-92.4009	-86.7859	-78.8296	-73.2781	-63.7476	-60.8607	-59.4728	-55.3266	-53.7491	-48.5236	-47.9409	-45.2243	-43.0571	-40.9581	-39.7339	-36.0459	-34.5766	-31.9542	-31.5958	-30.1043	-28.1814	-27.0963	-24.7865	-24.574	-22.4738	-20.7274	-19.1504
2364823	46594	0.00463269	-414.6496	-388.3429	-382.7743	-373.5405	-361.0728	-345.0697	-326.1563	-303.6613	-278.4462	-249.5458	-218.05	-182.7491	-145.0911	-126.8637	-113.4072	-110.5012	-106.3506	-103.6192	-102.5324	-97.585	-92.3764	-86.7589	-78.7921	-73.2361	-63.6806	-60.8405	-59.3011	-55.1887	-53.7469	-48.5142	-47.9268	-45.1667	-43.0468	-40.928	-39.7032	-36.0186	-34.5597	-31.9382	-31.565	-30.0792	-28.1527	-27.0697	-24.7591	-24.5363	-22.4429	-20.7096	-19.1186
2370000	46645	0.00463016	-414.7048	-388.3915	-382.8162	-373.5716	-361.0896	-345.0685	-326.1338	-303.614	-278.371	-249.4392	-217.9091	-182.5704	-144.8746	-126.8662	-113.4074	-110.4942	-106.3175	-103.5558	-102.3845	-97.5553	-92.3515	-86.7317	-78.7542	-73.1939	-63.6144	-60.8248	-59.1286	-55.0438	-53.7446	-48.505	-47.9127	-45.1084	-43.0363	-40.8981	-39.6721	-35.9916	-34.5423	-31.9223	-31.5339	-30.0541	-28.1238	-27.0429	-24.7357	-24.494	-22.4119	-20.6918	-19.0866
2385758	46800	0.00462249	-414.8718	-388.5385	-382.9429	-373.6656	-361.14	-345.0641	-326.0651	-303.4697	-278.1423	-249.1147	-217.4806	-182.0272	-144.2171	-126.8737	-113.4083	-110.4741	-106.2373	-103.4207	-101.8671	-97.4546	-92.2755	-86.6485	-78.6392	-73.0665	-63.4198	-60.7947	-58.6206	-54.5651	-53.7369	-48.4777	-47.8702	-44.9296	-43.0045	-40.8087	-39.577	-35.9117	-34.4866	-31.8749	-31.4384	-29.9788	-28.0369	-26.9619	-24.6817	-24.3472	-22.3181	-20.6379	-18.99
2401647	46956	0.00461483	-415.0388	-388.6854	-383.0695	-373.7592	-361.19	-345.059	-325.9952	-303.324	-277.9116	-248.788	-217.0493	-181.4806	-143.5563	-126.8808	-113.4095	-110.4552	-106.1789	-103.334	-101.2956	-97.3328	-92.1979	-86.5642	-78.5236	-72.9393	-63.2317	-60.7788	-58.1511	-54.0287	-53.7231	-48.4514	-47.8281	-44.7474	-42.9722	-40.7209	-39.4803	-35.8353	-34.4263	-31.8284	-31.3408	-29.9044	-27.9505	-26.8805	-24.6402	-24.1857	-22.2243	-20.5841	-18.8936
2405641	46995	0.00461291	-415.0805	-388.7222	-383.1011	-373.7826	-361.2024	-345.0576	-325.9776	-303.2873	-277.8536	-248.7059	-216.941	-181.3434	-143.3905	-126.8825	-113.4099	-110.4506	-106.1668	-103.3165	-101.1499	-97.298	-92.1782	-86.5429	-78.4946	-72.9076	-63.1855	-60.7761	-58.041	-53.8926	-53.7118	-48.4449	-47.8176	-44.7013	-42.9641	-40.6992	-39.456	-35.8167	-34.4105	-31.817	-31.3161	-29.8859	-27.9291	-26.86	-24.6308	-24.1441	-22.2008	-20.5706	-18.8696
2409645	47034	0.00461099	-415.1223	-388.7589	-383.1327	-373.806	-361.2148	-345.0561	-325.9599	-303.2505	-277.7955	-248.6236	-216.8325	-181.2059	-143.2245	-126.8842	-113.4102	-110.4461	-106.1555	-103.2999	-101.0041	-97.261	-92.1584	-86.5215	-78.4655	-72.8758	-63.1395	-60.7737	-57.9337	-53.7849	-53.6681	-48.4384	-47.8071	-44.6549	-42.9559	-40.6776	-39.4315	-35.7984	-34.3944	-31.8055	-31.2912	-29.8675	-27.9076	-26.8395	-24.6215	-24.1021	-22.1773	-20.5572	-18.8455
2413657	47073	0.00460908	-415.1641	-388.7957	-383.1643	-373.8293	-361.2271	-345.0546	-325.9421	-303.2136	-277.7372	-248.5412	-216.7238	-181.0682	-143.0583	-126.8858	-113.4106	-110.4416	-106.1449	-103.2844	-100.8586	-97.2218	-92.1385	-86.5	-78.4363	-72.844	-63.0937	-60.7717	-57.8295	-53.7486	-53.5494	-48.432	-47.7966	-44.6083	-42.9477	-40.656	-39.4069	-35.7803	-34.3779	-31.7942	-31.2662	-29.8491	-27.8863	-26.8189	-24.6124	-24.0599	-22.1538	-20.5437	-18.8215
2417669	47112	0.00460716	-415.2058	-388.8324	-383.1959	-373.8526	-361.2394	-345.0531	-325.9242	-303.1767	-277.679	-248.4588	-216.6151	-180.9305	-142.8922	-126.8874	-113.411	-110.4372	-106.1351	-103.2696	-100.7144	-97.1801	-92.1186	-86.4785	-78.4072	-72.8123	-63.0482	-60.77	-57.7285	-53.7385	-53.4011	-48.4255	-47.7862	-44.5616	-42.9395	-40.6346	-39.3824	-35.7626	-34.3612	-31.7829	-31.2411	-29.8308	-27.865	-26.7983	-24.6035	-24.0175	-22.1304	-20.5303	-18.7975
2425734	47191	0.00460333	-415.2894	-388.9059	-383.2591	-373.8991	-361.2639	-345.0498	-325.8883	-303.1024	-277.5619	-248.2932	-216.3968	-180.6541	-142.5588	-126.8905	-113.4118	-110.4284	-106.1171	-103.2418	-100.4297	-97.0879	-92.0781	-86.435	-78.3487	-72.7487	-62.9578	-60.7672	-57.5346	-53.73	-53.0818	-48.4127	-47.7653	-44.4673	-42.9229	-40.5919	-39.3329	-35.7277	-34.3268	-31.7603	-31.1904	-29.7943	-27.8226	-26.7566	-24.5859	-23.932	-22.0833	-20.5033	-18.7495
2433824	47269	0.0045995	-415.3728	-388.9793	-383.3222	-373.9456	-361.2883	-345.0463	-325.8521	-303.0279	-277.4444	-248.1272	-216.1781	-180.3771	-142.2251	-126.8934	-113.4126	-110.4198	-106.1013	-103.216	-100.1541	-96.9825	-92.0371	-86.3911	-78.2901	-72.6852	-62.868	-60.7651	-57.3517	-53.7248	-52.7468	-48.3998	-47.7445	-44.372	-42.9061	-40.5494	-39.2831	-35.6938	-34.2911	-31.738	-31.1391	-29.758	-27.7806	-26.7146	-24.5687	-23.846	-22.0362	-20.4764	-18.7017
2450161	47428	0.00459181	-415.5404	-389.1266	-383.4487	-374.0386	-361.3368	-345.0387	-325.7786	-302.8771	-277.2073	-247.7922	-215.7368	-179.8185	-141.5529	-126.8988	-113.4144	-110.4028	-106.0745	-103.1681	-99.6404	-96.7209	-91.9529	-86.3017	-78.172	-72.5576	-62.6897	-60.7628	-57.0143	-53.7163	-52.0393	-48.3737	-47.7028	-44.1777	-42.872	-40.4647	-39.1824	-35.629	-34.2158	-31.6937	-31.0345	-29.6856	-27.6972	-26.6289	-24.5346	-23.6723	-21.9413	-20.4222	-18.6059
2466635	47587	0.00458413	-415.7079	-389.2739	-383.575	-374.1313	-361.3847	-345.0303	-325.704	-302.7249	-276.9681	-247.4548	-215.2925	-179.2565	-140.8779	-126.9033	-113.4163	-110.3863	-106.053	-103.1235	-99.1991	-96.3774	-91.8654	-86.2101	-78.0531	-72.4297	-62.513	-60.7621	-56.71	-53.7084	-51.2962	-48.3462	-47.6612	-43.9786	-42.8369	-40.3806	-39.0805	-35.5683	-34.1354	-31.65	-30.9273	-29.6138	-27.6152	-26.541	-24.5007	-23.4978	-21.8457	-20.3676	-18.5104
2500000	47908	0.00456876	-416.0431	-389.5684	-383.8274	-374.3156	-361.479	-345.0109	-325.5512	-302.4156	-276.4839	-246.7725	-214.395	-178.1218	-139.5196	-126.9089	-113.4203	-110.3539	-106.0208	-103.0395	-98.5689	-95.4266	-91.6753	-86.0183	-77.8128	-72.1725	-62.163	-60.7637	-56.1746	-53.6918	-49.7556	-48.2757	-47.5765	-43.5621	-42.7619	-40.2127	-38.873	-35.4589	-33.9607	-31.5639	-30.7051	-29.4714	-27.4564	-26.357	-24.4324	-23.1494	-21.6519	-20.2574	-18.3208
2514418	48046	0.00456219	-416.1862	-389.6941	-383.9349	-374.394	-361.5185	-345.0016	-325.4845	-302.2816	-276.2747	-246.4782	-214.0081	-177.633	-138.9366	-126.9096	-113.422	-110.3403	-106.0102	-103.0046	-98.3874	-94.9353	-91.5845	-85.9321	-77.7093	-72.062	-62.0145	-60.7652	-55.9676	-53.6841	-49.1135	-48.2171	-47.5385	-43.3752	-42.7259	-40.1408	-38.7826	-35.4168	-33.8808	-31.5275	-30.6068	-29.4111	-27.3907	-26.2747	-24.4029	-23.0018	-21.5677	-20.2096	-18.2403
2516826	48069	0.0045611	-416.21	-389.715	-383.9528	-374.407	-361.5251	-345	-325.4733	-302.2592	-276.2397	-246.4291	-213.9436	-177.5514	-138.8395	-126.9096	-113.4223	-110.338	-106.0086	-102.9989	-98.361	-94.8503	-91.5685	-85.9175	-77.692	-72.0436	-61.9898	-60.7655	-55.9341	-53.6827	-49.0128	-48.2013	-47.5318	-43.3436	-42.7195	-40.1288	-38.7675	-35.4101	-33.8672	-31.5214	-30.5903	-29.401	-27.3799	-26.2608	-24.3979	-22.9774	-21.5536	-20.2016	-18.227
2519256	48092	0.00456	-416.234	-389.736	-383.9708	-374.4201	-361.5317	-344.9984	-325.462	-302.2366	-276.2045	-246.3795	-213.8784	-177.4692	-138.7416	-126.9095	-113.4226	-110.3357	-106.007	-102.9931	-98.3354	-94.7639	-91.5521	-85.9026	-77.6745	-72.025	-61.9649	-60.7658	-55.9006	-53.6814	-48.9149	-48.182	-47.5249	-43.3115	-42.7129	-40.1167	-38.7522	-35.4033	-33.8534	-31.5154	-30.5735	-29.3909	-27.3691	-26.2467	-24.3929	-22.9528	-21.5394	-20.1935	-18.2136
2521666	48115	0.00455891	-416.2578	-389.7569	-383.9886	-374.433	-361.5382	-344.9968	-325.4508	-302.2142	-276.1695	-246.3303	-213.8139	-177.3876	-138.6446	-126.9094	-113.4229	-110.3335	-106.0055	-102.9873	-98.311	-94.6777	-91.5356	-85.8878	-77.6572	-72.0065	-61.9403	-60.7661	-55.8677	-53.68	-48.8226	-48.1584	-47.5179	-43.2796	-42.7062	-40.1047	-38.737	-35.3967	-33.8397	-31.5094	-30.5569	-29.3809	-27.3584	-26.2327	-24.3879	-22.9285	-21.5252	-20.1855	-18.2003
2524079	48138	0.00455782	-416.2816	-389.7778	-384.0065	-374.446	-361.5447	-344.9951	-325.4396	-302.1917	-276.1345	-246.2811	-213.7492	-177.3059	-138.5475	-126.9093	-113.4232	-110.3312	-106.004	-102.9816	-98.2874	-94.5908	-91.5188	-85.8729	-77.6399	-71.9881	-61.9157	-60.7664	-55.8351	-53.6786	-48.7366	-48.1288	-47.5106	-43.2475	-42.6992	-40.0926	-38.7218	-35.3901	-33.826	-31.5033	-30.5402	-29.3709	-27.3477	-26.2186	-24.383	-22.9042	-21.511	-20.1775	-18.187
2526517	48161	0.00455672	-416.3055	-389.7988	-384.0245	-374.4591	-361.5512	-344.9934	-325.4282	-302.1691	-276.0991	-246.2314	-213.6839	-177.2235	-138.4495	-126.9092	-113.4235	-110.329	-106.0025	-102.9758	-98.2644	-94.5026	-91.5014	-85.8577	-77.6224	-71.9695	-61.8909	-60.7667	-55.8023	-53.6772	-48.6581	-48.0911	-47.5029	-43.2151	-42.6919	-40.0805	-38.7064	-35.3836	-33.812	-31.4973	-30.5232	-29.3608	-27.337	-26.2043	-24.3779	-22.8797	-21.4967	-20.1693	-18.1736
2528941	48184	0.00455563	-416.3294	-389.8198	-384.0424	-374.4721	-361.5577	-344.9917	-325.4169	-302.1465	-276.064	-246.182	-213.619	-177.1415	-138.3521	-126.909	-113.4238	-110.3267	-106.001	-102.9701	-98.2423	-94.4146	-91.4838	-85.8425	-77.6051	-71.951	-61.8662	-60.767	-55.77	-53.6758	-48.5901	-48.0445	-47.4947	-43.1828	-42.6844	-40.0685	-38.691	-35.3772	-33.798	-31.4913	-30.5064	-29.3508	-27.3264	-26.19	-24.3729	-22.8555	-21.4824	-20.1612	-18.1603
2532587	48219	0.00455399	-416.3651	-389.8512	-384.0692	-374.4915	-361.5674	-344.9892	-325.3999	-302.1125	-276.0111	-246.1077	-213.5214	-177.0183	-138.2058	-126.9086	-113.4242	-110.3233	-105.9989	-102.9615	-98.2106	-94.2818	-91.4566	-85.8195	-77.5789	-71.9231	-61.8292	-60.7675	-55.722	-53.6737	-48.5083	-47.9557	-47.4808	-43.1342	-42.6724	-40.0503	-38.6679	-35.3676	-33.7769	-31.4822	-30.4809	-29.3358	-27.3105	-26.1685	-24.3654	-22.8191	-21.4609	-20.1491	-18.1403
2536244	48254	0.00455234	-416.401	-389.8826	-384.0961	-374.511	-361.5771	-344.9865	-325.3828	-302.0785	-275.958	-246.0331	-213.4235	-176.8947	-138.0592	-126.9081	-113.4246	-110.32	-105.9969	-102.9529	-98.1803	-94.1482	-91.4283	-85.7962	-77.5527	-71.8952	-61.7922	-60.768	-55.6743	-53.6715	-48.4494	-47.8479	-47.4635	-43.0855	-42.6594	-40.0321	-38.6446	-35.3582	-33.7556	-31.4732	-30.4553	-29.3208	-27.2947	-26.1467	-24.3578	-22.7829	-21.4393	-20.1368	-18.1204
2539907	48288	0.0045507	-416.4368	-389.9141	-384.1229	-374.5305	-361.5868	-344.9839	-325.3656	-302.0443	-275.9049	-245.9585	-213.3255	-176.771	-137.9126	-126.9075	-113.4251	-110.3166	-105.9949	-102.9443	-98.1514	-94.0144	-91.3988	-85.7726	-77.5264	-71.8673	-61.7551	-60.7685	-55.6271	-53.6692	-48.408	-47.731	-47.4381	-43.0372	-42.645	-40.0139	-38.6213	-35.3489	-33.7342	-31.4642	-30.4295	-29.3057	-27.279	-26.1248	-24.3502	-22.7467	-21.4176	-20.1245	-18.1005
2543569	48323	0.00454906	-416.4725	-389.9454	-384.1497	-374.5499	-361.5964	-344.9812	-325.3485	-302.0102	-275.8518	-245.8839	-213.2276	-176.6474	-137.7662	-126.9068	-113.4255	-110.3132	-105.993	-102.9357	-98.1239	-93.8808	-91.368	-85.7488	-77.5002	-71.8393	-61.7182	-60.769	-55.5804	-53.6669	-48.3784	-47.6233	-47.393	-42.9896	-42.6289	-39.9956	-38.5978	-35.3398	-33.7127	-31.4552	-30.4036	-29.2907	-27.2634	-26.1028	-24.3426	-22.7108	-21.3958	-20.1122	-18.0806
2547249	48358	0.00454742	-416.5084	-389.9769	-384.1766	-374.5694	-361.6061	-344.9784	-325.3312	-301.9759	-275.7984	-245.809	-213.1293	-176.5232	-137.6193	-126.906	-113.426	-110.3098	-105.9911	-102.9271	-98.0975	-93.7471	-91.3357	-85.7246	-77.4738	-71.8113	-61.6812	-60.7695	-55.534	-53.6645	-48.3561	-47.5482	-47.308	-42.943	-42.6103	-39.9773	-38.5742	-35.3308	-33.6909	-31.4462	-30.3775	-29.2757	-27.2478	-26.0806	-24.3349	-22.6748	-21.3739	-20.0998	-18.0608
2550927	48393	0.00454578	-416.5442	-390.0083	-384.2034	-374.5888	-361.6157	-344.9757	-325.3139	-301.9415	-275.7451	-245.7341	-213.031	-176.3992	-137.4727	-126.9051	-113.4264	-110.3065	-105.9893	-102.9185	-98.0722	-93.6144	-91.3017	-85.7002	-77.4475	-71.7833	-61.6443	-60.77	-55.4881	-53.6621	-48.3387	-47.5079	-47.1847	-42.8984	-42.5886	-39.9589	-38.5505	-35.3219	-33.669	-31.4372	-30.3514	-29.2607	-27.2324	-26.0582	-24.3272	-22.6391	-21.352	-20.0874	-18.0409
2558302	48463	0.0045425	-416.6157	-390.0711	-384.257	-374.6275	-361.6347	-344.97	-325.2792	-301.8727	-275.6381	-245.584	-212.834	-176.1506	-137.1793	-126.9029	-113.4273	-110.2997	-105.9859	-102.9014	-98.0247	-93.3521	-91.2276	-85.6501	-77.3947	-71.7271	-61.5705	-60.7711	-55.3974	-53.6571	-48.3125	-47.4678	-46.8924	-42.8182	-42.5319	-39.9221	-38.5027	-35.3045	-33.6249	-31.4192	-30.2986	-29.2307	-27.2017	-26.013	-24.3117	-22.568	-21.3079	-20.0624	-18.0014
2573555	48607	0.00453575	-416.7628	-390.2002	-384.3671	-374.7071	-361.6737	-344.9579	-325.207	-301.7302	-275.4169	-245.2739	-212.4272	-175.6374	-136.5755	-126.8965	-113.429	-110.2859	-105.9795	-102.866	-97.9372	-92.8386	-91.0401	-85.5422	-77.2855	-71.611	-61.4189	-60.7731	-55.2153	-53.6459	-48.2755	-47.4196	-46.2582	-42.7053	-42.3412	-39.8457	-38.4024	-35.2702	-33.5325	-31.3822	-30.188	-29.1689	-27.1396	-25.918	-24.2795	-22.4238	-21.2158	-20.0103	-17.9204
2578678	48656	0.0045335	-416.812	-390.2433	-384.4038	-374.7336	-361.6866	-344.9536	-325.1827	-301.6823	-275.3427	-245.1698	-212.2907	-175.4652	-136.3736	-126.8938	-113.4296	-110.2813	-105.9775	-102.8542	-97.9105	-92.6794	-90.9632	-85.5044	-77.2488	-71.572	-61.3683	-60.7738	-55.1557	-53.6418	-48.2656	-47.4058	-46.0486	-42.6804	-42.2568	-39.82	-38.3681	-35.2591	-33.5011	-31.3698	-30.1505	-29.1483	-27.1191	-25.8856	-24.2685	-22.3762	-21.1846	-19.9926	-17.8935
2583781	48704	0.00453126	-416.8609	-390.2862	-384.4403	-374.7599	-361.6994	-344.9494	-325.1584	-301.6346	-275.2687	-245.0661	-212.1547	-175.2938	-136.173	-126.8907	-113.4302	-110.2767	-105.9756	-102.8424	-97.8851	-92.5295	-90.8778	-85.4658	-77.2123	-71.5332	-61.3182	-60.7743	-55.0971	-53.6375	-48.2564	-47.3926	-45.8436	-42.6592	-42.1648	-39.7943	-38.3336	-35.2483	-33.4697	-31.3575	-30.1129	-29.1277	-27.0989	-25.8531	-24.2576	-22.3292	-21.1535	-19.9748	-17.8668
2588921	48752	0.00452901	-416.91	-390.3292	-384.477	-374.7863	-361.7122	-344.945	-325.1339	-301.5864	-275.1942	-244.9617	-212.0179	-175.1213	-135.9714	-126.8873	-113.4308	-110.2721	-105.9738	-102.8306	-97.8605	-92.3885	-90.7819	-85.4259	-77.1755	-71.4941	-61.2679	-60.7748	-55.0388	-53.633	-48.2477	-47.3795	-45.6417	-42.6404	-42.0649	-39.7683	-38.2984	-35.2376	-33.4379	-31.3452	-30.0748	-29.1071	-27.0787	-25.8201	-24.2466	-22.2824	-21.122	-19.9569	-17.84
2594070	48801	0.00452676	-416.9591	-390.3723	-384.5137	-374.8127	-361.7249	-344.9406	-325.1093	-301.5382	-275.1195	-244.8572	-211.8809	-174.9485	-135.77	-126.8835	-113.4314	-110.2675	-105.972	-102.8188	-97.8368	-92.2584	-90.6752	-85.3849	-77.1386	-71.4549	-61.2177	-60.7751	-54.9811	-53.6283	-48.2394	-47.3666	-45.4448	-42.6232	-41.9582	-39.7423	-38.2628	-35.2271	-33.406	-31.3328	-30.0364	-29.0864	-27.0587	-25.7869	-24.2355	-22.236	-21.0903	-19.9388	-17.8132
2599234	48849	0.00452451	-417.0082	-390.4153	-384.5503	-374.839	-361.7376	-344.9361	-325.0846	-301.4899	-275.0447	-244.7524	-211.7436	-174.7754	-135.5687	-126.8793	-113.4319	-110.2628	-105.9703	-102.8069	-97.8139	-92.1394	-90.5572	-85.3425	-77.1017	-71.4156	-61.1677	-60.7753	-54.924	-53.6234	-48.2314	-47.3539	-45.2533	-42.607	-41.8444	-39.7161	-38.2264	-35.2167	-33.3738	-31.3204	-29.9976	-29.0658	-27.0387	-25.7533	-24.2242	-22.1899	-21.0583	-19.9205	-17.7866
2604403	48898	0.00452226	-417.0572	-390.4583	-384.5869	-374.8653	-361.7503	-344.9315	-325.0598	-301.4414	-274.9698	-244.6476	-211.6062	-174.6023	-135.3677	-126.8747	-113.4325	-110.2582	-105.9686	-102.795	-97.7917	-92.032	-90.4281	-85.2988	-77.0647	-71.3763	-61.1181	-60.7752	-54.8676	-53.6181	-48.2237	-47.3412	-45.0682	-42.5916	-41.7241	-39.6898	-38.1895	-35.2065	-33.3414	-31.308	-29.9587	-29.0451	-27.0189	-25.7195	-24.213	-22.1443	-21.0262	-19.902	-17.76
2609601	48946	0.00452001	-417.1063	-390.5014	-384.6236	-374.8916	-361.7629	-344.9269	-325.0349	-301.3927	-274.8945	-244.5422	-211.4681	-174.4283	-135.1662	-126.8696	-113.433	-110.2536	-105.967	-102.7831	-97.7701	-91.9352	-90.2882	-85.2534	-77.0274	-71.3367	-61.0687	-60.7747	-54.8116	-53.6125	-48.2161	-47.3286	-44.8892	-42.5766	-41.5963	-39.6632	-38.1516	-35.1964	-33.3087	-31.2956	-29.9192	-29.0243	-26.9992	-25.6853	-24.2016	-22.0989	-20.9938	-19.8833	-17.7334
2614780	48995	0.00451777	-417.1552	-390.5442	-384.66	-374.9178	-361.7754	-344.9222	-325.0099	-301.3441	-274.8194	-244.4372	-211.3306	-174.255	-134.9661	-126.864	-113.4336	-110.249	-105.9655	-102.7713	-97.7493	-91.849	-90.1396	-85.2066	-76.9904	-71.2973	-61.0202	-60.7736	-54.7566	-53.6066	-48.2088	-47.3161	-44.7183	-42.562	-41.4625	-39.6367	-38.1131	-35.1865	-33.2761	-31.2832	-29.8797	-29.0037	-26.9797	-25.651	-24.1902	-22.0542	-20.9614	-19.8646	-17.707
2620000	49044	0.00451552	-417.2044	-390.5873	-384.6966	-374.944	-361.7879	-344.9173	-324.9848	-301.2951	-274.7438	-244.3314	-211.1921	-174.0805	-134.7652	-126.8578	-113.4341	-110.2443	-105.964	-102.7593	-97.7289	-91.7714	-89.982	-85.1576	-76.953	-71.2575	-60.9727	-60.7712	-54.7019	-53.6002	-48.2015	-47.3035	-44.5539	-42.5474	-41.321	-39.6098	-38.0733	-35.1766	-33.243	-31.2707	-29.8396	-28.9829	-26.9602	-25.6161	-24.1786	-22.0097	-20.9286	-19.8455	-17.6805
2630466	49142	0.00451102	-417.3025	-390.6733	-384.7698	-374.9964	-361.8127	-344.9075	-324.9342	-301.1969	-274.5922	-244.1195	-210.9146	-173.7309	-134.3646	-126.8437	-113.4352	-110.235	-105.9612	-102.7353	-97.6896	-91.6387	-89.6485	-85.0534	-76.878	-71.1777	-60.8862	-60.7581	-54.5949	-53.586	-48.1873	-47.2784	-44.2487	-42.5184	-41.0179	-39.5557	-37.9901	-35.1573	-33.1763	-31.2456	-29.7584	-28.9412	-26.9215	-25.5456	-24.1551	-21.9222	-20.8625	-19.8066	-17.6278
2641011	49240	0.00450651	-417.4009	-390.7596	-384.843	-375.0488	-361.8374	-344.8973	-324.8831	-301.0978	-274.4394	-243.9061	-210.6353	-173.3792	-133.9643	-126.8268	-113.4362	-110.2257	-105.9585	-102.7112	-97.652	-91.5282	-89.298	-84.9388	-76.8023	-71.0972	-60.8315	-60.7128	-54.4908	-53.5694	-48.1734	-47.2532	-43.974	-42.4888	-40.6894	-39.5005	-37.9001	-35.1382	-33.1086	-31.2204	-29.6755	-28.8992	-26.883	-25.4738	-24.1312	-21.8362	-20.7955	-19.7665	-17.5752
2651589	49339	0.00450201	-417.4991	-390.8456	-384.9161	-375.1009	-361.8618	-344.8869	-324.8317	-300.9983	-274.2863	-243.6922	-210.3554	-173.0268	-133.5668	-126.8066	-113.4372	-110.2163	-105.956	-102.6871	-97.6159	-91.4338	-88.9414	-84.8121	-76.7264	-71.0163	-60.814	-60.6304	-54.3907	-53.5497	-48.1597	-47.2281	-43.7302	-42.4581	-40.3416	-39.4445	-37.8011	-35.1195	-33.0401	-31.195	-29.5913	-28.857	-26.8449	-25.4008	-24.1068	-21.7522	-20.7279	-19.7254	-17.5229
2656894	49388	0.00449976	-417.5482	-390.8886	-384.9525	-375.1269	-361.8739	-344.8815	-324.8058	-300.9484	-274.2095	-243.5849	-210.2152	-172.8502	-133.369	-126.7951	-113.4377	-110.2116	-105.9548	-102.6749	-97.5983	-91.3909	-88.7631	-84.7435	-76.6882	-70.9757	-60.8111	-60.5835	-54.3424	-53.5384	-48.1529	-47.2154	-43.6191	-42.4422	-40.1628	-39.4159	-37.7471	-35.1102	-33.0055	-31.1822	-29.5486	-28.8358	-26.826	-25.3639	-24.0945	-21.7109	-20.694	-19.7043	-17.4968
2662238	49438	0.0044975	-417.5975	-390.9318	-384.9892	-375.153	-361.8861	-344.8761	-324.7797	-300.8981	-274.1321	-243.477	-210.074	-172.6725	-133.171	-126.7825	-113.4382	-110.2069	-105.9536	-102.6627	-97.5809	-91.3501	-88.5851	-84.6705	-76.6498	-70.9347	-60.8096	-60.5348	-54.2951	-53.5259	-48.1462	-47.2027	-43.5142	-42.4257	-39.9814	-39.3867	-37.689	-35.1009	-32.9704	-31.1693	-29.5053	-28.8145	-26.807	-25.3265	-24.0819	-21.6699	-20.6597	-19.6827	-17.4707
2667562	49487	0.00449525	-417.6466	-390.9747	-385.0256	-375.179	-361.8981	-344.8706	-324.7536	-300.8479	-274.055	-243.3695	-209.9334	-172.4956	-132.975	-126.7689	-113.4387	-110.2022	-105.9524	-102.6506	-97.5639	-91.3115	-88.41	-84.5934	-76.6115	-70.8938	-60.809	-60.4855	-54.2496	-53.5123	-48.1394	-47.1901	-43.4163	-42.4086	-39.8011	-39.3566	-37.6265	-35.0916	-32.9353	-31.1564	-29.4618	-28.7932	-26.7882	-25.2891	-24.0692	-21.6297	-20.6256	-19.6609	-17.4448
2672920	49537	0.004493	-417.6958	-391.0178	-385.0621	-375.2049	-361.9101	-344.865	-324.7274	-300.7975	-273.9775	-243.2613	-209.792	-172.3176	-132.7792	-126.7539	-113.4392	-110.1975	-105.9513	-102.6383	-97.5471	-91.2743	-88.2369	-84.5113	-76.5728	-70.8526	-60.8089	-60.4355	-54.2054	-53.4971	-48.1327	-47.1774	-43.3241	-42.3907	-39.6229	-39.3243	-37.5582	-35.0823	-32.8997	-31.1434	-29.4178	-28.7717	-26.7694	-25.2513	-24.0564	-21.5897	-20.5913	-19.6387	-17.4189
2678281	49586	0.00449075	-417.7449	-391.0608	-385.0986	-375.2308	-361.922	-344.8593	-324.7011	-300.747	-273.8999	-243.1531	-209.6505	-172.1397	-132.5849	-126.7376	-113.4396	-110.1927	-105.9502	-102.6261	-97.5305	-91.2385	-88.0674	-84.424	-76.5341	-70.8114	-60.8091	-60.3852	-54.1631	-53.4803	-48.126	-47.1646	-43.2378	-42.3721	-39.4542	-39.2851	-37.4834	-35.073	-32.8639	-31.1303	-29.3733	-28.7501	-26.7506	-25.2132	-24.0434	-21.5503	-20.557	-19.616	-17.393
2683655	49636	0.0044885	-417.794	-391.1038	-385.135	-375.2567	-361.9339	-344.8536	-324.6746	-300.6963	-273.8221	-243.0447	-209.5088	-171.9615	-132.3917	-126.7198	-113.44	-110.188	-105.9491	-102.6138	-97.5142	-91.2039	-87.9018	-84.3311	-76.4953	-70.7699	-60.8096	-60.3347	-54.1227	-53.4617	-48.1193	-47.1518	-43.1569	-42.3524	-39.3256	-39.2098	-37.4005	-35.0635	-32.8277	-31.1171	-29.3284	-28.7284	-26.7319	-25.1749	-24.0302	-21.5114	-20.5227	-19.5929	-17.3672
2700000	49787	0.00448167	-417.9431	-391.2343	-385.2455	-375.3351	-361.9697	-344.8357	-324.5937	-300.5416	-273.5849	-242.7142	-209.077	-171.4183	-131.8139	-126.6549	-113.4413	-110.1735	-105.946	-102.5763	-97.4657	-91.1044	-87.4289	-84.0104	-76.3764	-70.643	-60.8119	-60.1802	-54.0134	-53.3925	-48.099	-47.1128	-42.9425	-42.2851	-39.1975	-38.7632	-37.086	-35.034	-32.7151	-31.0763	-29.1893	-28.6617	-26.6752	-25.0569	-23.9889	-21.3961	-20.4189	-19.5195	-17.2893
2716574	49940	0.00447484	-418.0921	-391.3648	-385.3559	-375.4132	-362.0049	-344.8171	-324.5118	-300.3856	-273.346	-242.3816	-208.6426	-170.8722	-131.2536	-126.5693	-113.4424	-110.1589	-105.943	-102.5386	-97.4186	-91.0108	-87.0102	-83.6252	-76.256	-70.5144	-60.8149	-60.0248	-53.9263	-53.302	-48.0787	-47.0733	-42.7714	-42.203	-39.1044	-38.3791	-36.6574	-35.0011	-32.5973	-31.0342	-29.0455	-28.5929	-26.6186	-24.9365	-23.9455	-21.2847	-20.3161	-19.4409	-17.2118
2750000	50246	0.00446118	-418.3904	-391.6257	-385.5763	-375.5685	-362.074	-344.7776	-324.3449	-300.0694	-272.8629	-241.7098	-207.7659	-169.7708	-130.2162	-126.3059	-113.4443	-110.1294	-105.9372	-102.4621	-97.3277	-90.834	-86.3507	-82.6564	-76.009	-70.2509	-60.822	-59.7121	-53.8117	-53.063	-48.0378	-46.9927	-42.5394	-41.9883	-38.9179	-37.8821	-35.5722	-34.8813	-32.3351	-30.9426	-28.7449	-28.4431	-26.5045	-24.6904	-23.8492	-21.0731	-20.1178	-19.2647	-17.0579
2780000	50519	0.00444909	-418.6543	-391.8565	-385.7709	-375.705	-362.1335	-344.7402	-324.1937	-299.785	-272.4296	-241.108	-206.9812	-168.7857	-129.4457	-125.9149	-113.4453	-110.1027	-105.9323	-102.3933	-97.2499	-90.684	-85.9336	-81.6196	-75.7814	-70.0094	-60.8289	-59.4337	-53.7526	-52.8105	-48.001	-46.9194	-42.4135	-41.7645	-38.7486	-37.5952	-35.048	-34.2573	-32.0425	-30.8444	-28.4849	-28.2642	-26.4009	-24.4701	-23.7471	-20.8959	-19.9548	-19.0845	-16.9228
2810437	50795	0.004437	-418.9183	-392.0872	-385.9651	-375.8405	-362.1914	-344.7004	-324.0393	-299.4962	-271.9906	-240.4993	-206.1882	-167.7909	-128.8691	-125.3206	-113.4457	-110.0754	-105.9273	-102.3235	-97.1735	-90.5369	-85.6183	-80.4798	-75.5408	-69.7579	-60.836	-59.154	-53.7125	-52.5401	-47.9633	-46.8439	-42.3209	-41.5371	-38.5752	-37.3575	-34.9568	-33.3555	-31.6355	-30.6969	-28.2903	-27.9589	-26.292	-24.2561	-23.6159	-20.7259	-19.8061	-18.8802	-16.7881
2841048	51071	0.004425	-419.1804	-392.316	-386.1574	-375.9742	-362.2474	-344.6586	-323.8826	-299.2051	-271.5493	-239.8882	-205.3928	-166.7938	-128.4904	-124.5283	-113.4451	-110.0476	-105.9219	-102.253	-97.0987	-90.3922	-85.3655	-79.3005	-75.2807	-69.4954	-60.8433	-58.8752	-53.6816	-52.2634	-47.9248	-46.7663	-42.243	-41.3195	-38.3999	-37.1386	-34.9065	-32.7328	-31.1785	-30.3754	-28.139	-27.5164	-26.1718	-24.0642	-23.4344	-20.5616	-19.6717	-18.655	-16.6544
2872076	51349	0.004413	-419.4424	-392.5448	-386.3493	-376.1069	-362.3017	-344.6144	-323.7227	-298.9097	-271.1025	-239.2702	-204.589	-165.7869	-128.2561	-123.5833	-113.4433	-110.019	-105.9161	-102.1815	-97.0243	-90.2481	-85.1486	-78.1217	-74.9812	-69.2156	-60.8506	-58.5953	-53.6551	-51.9831	-47.885	-46.6857	-42.1716	-41.1133	-38.2226	-36.9239	-34.8644	-32.3585	-30.9165	-29.7804	-27.9915	-26.9386	-26.016	-23.905	-23.1747	-20.3991	-19.5477	-18.4097	-16.5198
2903529	51629	0.004401	-419.7045	-392.7735	-386.5408	-376.2387	-362.3545	-344.5678	-323.5594	-298.6099	-270.65	-238.6452	-203.7767	-164.7701	-128.1127	-122.5398	-113.44	-109.9894	-105.9095	-102.1088	-96.9501	-90.1038	-84.9537	-77.0075	-74.6	-68.9116	-60.858	-58.3143	-53.6305	-51.7016	-47.8437	-46.6017	-42.1032	-40.9188	-38.0446	-36.7073	-34.8251	-32.1034	-30.7817	-29.18	-27.8354	-26.3457	-25.6953	-23.7765	-22.8107	-20.2345	-19.43	-18.1454	-16.3831
2935414	51912	0.004389	-419.9666	-393.002	-386.7318	-376.3696	-362.4057	-344.5188	-323.3928	-298.3055	-270.1917	-238.013	-202.9558	-163.7434	-128.0236	-121.4354	-113.4343	-109.9585	-105.9019	-102.0349	-96.8757	-89.9591	-84.7727	-76.0643	-74.0504	-68.5724	-60.8654	-58.0323	-53.6062	-51.4205	-47.8006	-46.5136	-42.0362	-40.7353	-37.8673	-36.4852	-34.787	-31.9009	-30.6831	-28.7185	-27.6648	-26.038	-24.9992	-23.6676	-22.3053	-20.0611	-19.3139	-17.8607	-16.2426
2967487	52195	0.00437709	-420.2267	-393.2287	-386.9209	-376.4985	-362.4548	-344.4677	-323.224	-297.999	-269.7313	-237.3787	-202.1328	-162.7147	-127.9681	-120.3023	-113.4253	-109.9263	-105.893	-101.9604	-96.8015	-89.8147	-84.602	-75.3961	-73.2632	-68.1835	-60.8726	-57.7516	-53.5815	-51.1431	-47.7557	-46.4216	-41.9703	-40.5634	-37.6933	-36.2573	-34.7495	-31.7264	-30.5969	-28.3839	-27.4789	-25.871	-24.2344	-23.5686	-21.6267	-19.8654	-19.1913	-17.5508	-16.0956
3000000	52480	0.00436518	-420.4869	-393.4553	-387.1096	-376.6264	-362.5023	-344.4141	-323.0518	-297.688	-269.265	-236.7371	-201.3011	-161.6761	-127.9333	-119.1469	-113.4109	-109.8918	-105.8822	-101.8845	-96.7265	-89.6695	-84.4372	-74.9489	-72.3124	-67.7146	-60.8799	-57.4701	-53.5554	-50.8684	-47.7084	-46.3243	-41.9042	-40.4005	-37.5223	-36.0212	-34.7118	-31.5678	-30.5147	-28.1322	-27.2792	-25.7276	-23.6158	-23.4589	-20.8391	-19.6087	-19.0317	-17.1966	-15.9327
3029863	52741	0.00435439	-420.7227	-393.6607	-387.2803	-376.7416	-362.544	-344.3634	-322.8927	-297.402	-268.8373	-236.1493	-200.5395	-160.7257	-127.9137	-118.0907	-113.3899	-109.8579	-105.8704	-101.8145	-96.6578	-89.5368	-84.2911	-74.643	-71.4362	-67.187	-60.8863	-57.2143	-53.5297	-50.6226	-47.6632	-46.2306	-41.8439	-40.2598	-37.3704	-35.7996	-34.6769	-31.4335	-30.4413	-27.9493	-27.0915	-25.5986	-23.4116	-23.1204	-20.2532	-19.3144	-18.743	-16.8098	-15.7502
3060099	53003	0.00434359	-420.9586	-393.8659	-387.4506	-376.856	-362.5843	-344.3106	-322.7307	-297.1123	-268.4047	-235.5554	-199.7707	-159.7671	-127.9022	-117.0381	-113.3547	-109.8204	-105.8559	-101.7432	-96.5881	-89.4032	-84.147	-74.3819	-70.6325	-66.5278	-60.8926	-56.9579	-53.5014	-50.3807	-47.6153	-46.131	-41.7829	-40.125	-37.2218	-35.5715	-34.6408	-31.3061	-30.3677	-27.7933	-26.9034	-25.4648	-23.3254	-22.7339	-19.9099	-19.1075	-18.202	-16.3537	-15.4642
3090713	53268	0.0043328	-421.1944	-394.071	-387.6205	-376.9695	-362.6232	-344.2558	-322.5658	-296.8186	-267.9673	-234.9555	-198.9946	-158.8001	-127.8964	-116.0102	-113.2894	-109.7773	-105.8379	-101.6706	-96.5172	-89.2686	-84.0043	-74.1438	-69.9452	-65.7171	-60.8986	-56.7013	-53.4695	-50.1438	-47.5645	-46.0245	-41.7212	-39.9953	-37.0766	-35.338	-34.6025	-31.1843	-30.2931	-27.6541	-26.7194	-25.3232	-23.243	-22.3817	-19.6953	-18.98	-17.6488	-15.9562	-14.9078
3121710	53534	0.004322	-421.4303	-394.2761	-387.7901	-377.0822	-362.6607	-344.1988	-322.398	-296.5212	-267.5249	-234.3494	-198.2111	-157.8247	-127.8951	-115.059	-113.1488	-109.7253	-105.8148	-101.5965	-96.4448	-89.1329	-83.8623	-73.9181	-69.3795	-64.7622	-60.9041	-56.4443	-53.4331	-49.9128	-47.5103	-45.9102	-41.6584	-39.8703	-36.9346	-35.1018	-34.5596	-31.0673	-30.2171	-27.5257	-26.5424	-25.1725	-23.1605	-22.0488	-19.5277	-18.8772	-17.216	-15.7066	-14.2845
3137389	53668	0.00431659	-421.5485	-394.3788	-387.8749	-377.1384	-362.679	-344.1695	-322.3128	-296.3706	-267.3013	-234.0434	-197.8158	-157.3327	-127.8956	-114.6497	-113.0145	-109.6939	-105.8008	-101.5587	-96.408	-89.0645	-83.7912	-73.808	-69.1354	-64.2385	-60.9066	-56.3154	-53.4126	-49.7996	-47.4817	-45.8495	-41.6265	-39.8092	-36.8647	-34.9843	-34.5347	-31.0104	-30.1785	-27.464	-26.4569	-25.0931	-23.1189	-21.8861	-19.4518	-18.8294	-17.0367	-15.6106	-14.143
3153180	53803	0.00431118	-421.6668	-394.4816	-387.9597	-377.1944	-362.6969	-344.1396	-322.2267	-296.2189	-267.0763	-233.7356	-197.4182	-156.8382	-127.8969	-114.3197	-112.8055	-109.657	-105.7845	-101.5204	-96.3706	-88.9957	-83.7201	-73.6991	-68.9126	-63.6902	-60.9087	-56.1863	-53.3903	-49.6882	-47.4521	-45.7864	-41.5943	-39.7489	-36.7954	-34.8698	-34.5051	-30.9544	-30.1393	-27.4037	-26.3737	-25.0112	-23.0769	-21.7249	-19.3789	-18.7829	-16.8746	-15.5231	-14.0457
3169059	53939	0.00430577	-421.785	-394.5842	-388.0443	-377.2501	-362.7145	-344.1092	-322.14	-296.0664	-266.8502	-233.4264	-197.0189	-156.3419	-127.8989	-114.0855	-112.5091	-109.6123	-105.7655	-101.4816	-96.3328	-88.9267	-83.6489	-73.5914	-68.7079	-63.1229	-60.9101	-56.0573	-53.3659	-49.579	-47.4215	-45.7207	-41.5617	-39.6896	-36.7269	-34.7627	-34.4667	-30.8993	-30.0997	-27.3445	-26.293	-24.9267	-23.0346	-21.5648	-19.3084	-18.7372	-16.7257	-15.4404	-13.9619
3185048	54074	0.00430035	-421.9033	-394.6869	-388.1289	-377.3057	-362.7317	-344.0782	-322.0525	-295.9127	-266.6226	-233.1155	-196.6176	-155.8432	-127.9013	-113.9345	-112.1418	-109.5559	-105.7431	-101.4422	-96.2943	-88.8573	-83.5777	-73.4844	-68.5177	-62.5405	-60.9102	-55.928	-53.339	-49.4718	-47.3898	-45.6522	-41.5287	-39.631	-36.6591	-34.6702	-34.4122	-30.8451	-30.0595	-27.2862	-26.2146	-24.8396	-22.9918	-21.4053	-19.2394	-18.692	-16.5868	-15.3602	-13.8832
3201129	54211	0.00429494	-422.0215	-394.7896	-388.2133	-377.361	-362.7485	-344.0467	-321.9643	-295.7582	-266.3939	-232.8031	-196.2146	-155.3426	-127.9042	-113.8397	-111.739	-109.4816	-105.7164	-101.4022	-96.2553	-88.7877	-83.5063	-73.3782	-68.3396	-61.9497	-60.9064	-55.7985	-53.3092	-49.3669	-47.3569	-45.5807	-41.4954	-39.5733	-36.5919	-34.6	-34.3342	-30.7918	-30.0188	-27.2286	-26.1385	-24.7501	-22.9487	-21.2462	-19.1717	-18.6472	-16.4559	-15.2812	-13.8069
3217319	54348	0.00428953	-422.1398	-394.8922	-388.2977	-377.4161	-362.765	-344.0146	-321.8752	-295.6025	-266.1639	-232.489	-195.8094	-154.8396	-127.9076	-113.7782	-111.3347	-109.3789	-105.6839	-101.3615	-96.2155	-88.7176	-83.4348	-73.2723	-68.1712	-61.3676	-60.8846	-55.6687	-53.2759	-49.2644	-47.3229	-45.5059	-41.4616	-39.5161	-36.5253	-34.5508	-34.2338	-30.7393	-29.9776	-27.1716	-26.0647	-24.6582	-22.9051	-21.087	-19.1048	-18.6025	-16.3313	-15.2025	-13.7317
3221374	54382	0.00428818	-422.1693	-394.9178	-388.3187	-377.4298	-362.769	-344.0065	-321.8529	-295.5635	-266.1063	-232.4104	-195.7081	-154.7138	-127.9085	-113.7664	-111.2373	-109.3471	-105.6747	-101.3512	-96.2055	-88.7001	-83.4169	-73.246	-68.1305	-61.2343	-60.8662	-55.6362	-53.2669	-49.2392	-47.3142	-45.4868	-41.453	-39.502	-36.5087	-34.5409	-34.2063	-30.7263	-29.9673	-27.1575	-26.0466	-24.635	-22.8942	-21.0473	-19.0882	-18.5913	-16.3011	-15.1828	-13.713
3225445	54416	0.00428682	-422.1989	-394.9435	-388.3398	-377.4436	-362.7731	-343.9984	-321.8304	-295.5244	-266.0484	-232.3315	-195.6063	-154.5876	-127.9094	-113.7555	-111.1421	-109.3123	-105.6649	-101.3408	-96.1954	-88.6826	-83.399	-73.2196	-68.0901	-61.1194	-60.8287	-55.6036	-53.2577	-49.2141	-47.3054	-45.4673	-41.4445	-39.4879	-36.4922	-34.5317	-34.1779	-30.7133	-29.9568	-27.1433	-26.0286	-24.6115	-22.8832	-21.0075	-19.0716	-18.5801	-16.2712	-15.1631	-13.6943
3229522	54451	0.00428547	-422.2285	-394.9691	-388.3608	-377.4573	-362.7771	-343.9902	-321.808	-295.4852	-265.9905	-232.2525	-195.5045	-154.4612	-127.9103	-113.7456	-111.0497	-109.2741	-105.6547	-101.3304	-96.1852	-88.665	-83.381	-73.1932	-68.0502	-61.0401	-60.7554	-55.571	-53.2482	-49.1891	-47.2965	-45.4477	-41.4359	-39.4738	-36.4757	-34.523	-34.1488	-30.7004	-29.9464	-27.1292	-26.0107	-24.5879	-22.8721	-20.9677	-19.0551	-18.5689	-16.2416	-15.1434	-13.6757
3233606	54485	0.00428412	-422.258	-394.9948	-388.3819	-377.471	-362.7811	-343.982	-321.7854	-295.4459	-265.9326	-232.1734	-195.4025	-154.3347	-127.9113	-113.7366	-110.9605	-109.2323	-105.6438	-101.3199	-96.175	-88.6473	-83.3631	-73.1669	-68.0107	-60.9982	-60.6443	-55.5383	-53.2383	-49.1644	-47.2876	-45.4278	-41.4273	-39.4597	-36.4592	-34.5148	-34.1192	-30.6875	-29.9359	-27.1151	-25.9929	-24.5642	-22.861	-20.9278	-19.0386	-18.5577	-16.2122	-15.1236	-13.657
3241793	54554	0.00428141	-422.3172	-395.0461	-388.424	-377.4984	-362.789	-343.9654	-321.7402	-295.3672	-265.8164	-232.0149	-195.1982	-154.0813	-127.9132	-113.7206	-110.7937	-109.1368	-105.6201	-101.2988	-96.1544	-88.612	-83.3271	-73.1142	-67.933	-60.9669	-60.3692	-55.4727	-53.2176	-49.1152	-47.2694	-45.3874	-41.4099	-39.4317	-36.4264	-34.4997	-34.0586	-30.6618	-29.9148	-27.0869	-25.9578	-24.5163	-22.8388	-20.8481	-19.0057	-18.5353	-16.1544	-15.0839	-13.6197
3250000	54623	0.0042787	-422.3763	-395.0973	-388.466	-377.5257	-362.7968	-343.9488	-321.6949	-295.2882	-265.6999	-231.8562	-194.9936	-153.8275	-127.9153	-113.707	-110.6445	-109.0242	-105.5934	-101.2774	-96.1336	-88.5767	-83.2911	-73.0617	-67.8567	-60.9567	-60.073	-55.407	-53.1956	-49.0668	-47.251	-45.346	-41.3925	-39.4038	-36.3937	-34.4857	-33.9966	-30.6363	-29.8936	-27.0589	-25.9232	-24.468	-22.8165	-20.7683	-18.9729	-18.5129	-16.0978	-15.044	-13.5825
3280000	54874	0.0042689	-422.5904	-395.283	-388.6181	-377.6242	-362.8243	-343.8873	-321.5289	-295.0001	-265.2754	-231.2776	-194.2482	-152.9036	-127.9232	-113.6714	-110.2605	-108.479	-105.4619	-101.1974	-96.0561	-88.4478	-83.16	-72.8716	-67.5904	-60.9496	-58.9745	-55.165	-53.1005	-48.8966	-47.1814	-45.1878	-41.328	-39.3039	-36.2762	-34.4409	-33.7642	-30.5453	-29.8155	-26.9578	-25.8013	-24.2892	-22.7344	-20.4789	-18.8549	-18.4308	-15.9009	-14.8972	-13.4472
3310242	55127	0.0042591	-422.8046	-395.4685	-388.7699	-377.7219	-362.8506	-343.8239	-321.3603	-294.7086	-264.8465	-230.6937	-193.4964	-151.9726	-127.9316	-113.6489	-110.0591	-107.8261	-105.2413	-101.1122	-95.9746	-88.3178	-83.0279	-72.6818	-67.3363	-60.9514	-57.8953	-54.9121	-52.9719	-48.7344	-47.1074	-45.0153	-41.2614	-39.2054	-36.1599	-34.4003	-33.5251	-30.4559	-29.7357	-26.8573	-25.6844	-24.105	-22.6506	-20.1885	-18.7376	-18.3472	-15.7157	-14.7463	-13.3106
3340887	55382	0.0042493	-423.0187	-395.654	-388.9213	-377.8189	-362.8757	-343.7587	-321.1892	-294.4137	-264.4132	-230.1044	-192.7381	-151.0346	-127.9405	-113.6337	-109.9448	-107.2363	-104.8662	-101.0189	-95.888	-88.1865	-82.8945	-72.492	-67.0905	-60.955	-56.8858	-54.6351	-52.7873	-48.5791	-47.0288	-44.8266	-41.1922	-39.1081	-36.0448	-34.3612	-33.2824	-30.3677	-29.6541	-26.7571	-25.5714	-23.9165	-22.5648	-19.8976	-18.6206	-18.2609	-15.5407	-14.5907	-13.1721
3371887	55638	0.0042395	-423.2328	-395.8394	-389.0723	-377.9151	-362.8995	-343.6916	-321.0154	-294.1153	-263.9756	-229.5096	-191.9732	-150.0894	-127.9497	-113.6228	-109.8694	-106.815	-104.2893	-100.9125	-95.7946	-88.0538	-82.7597	-72.3019	-66.8507	-60.959	-56.02	-54.3124	-52.5033	-48.4287	-46.9453	-44.6196	-41.1198	-39.0116	-35.9305	-34.3223	-33.038	-30.2804	-29.5708	-26.657	-25.4613	-23.7243	-22.477	-19.6074	-18.5037	-18.1707	-15.3747	-14.4306	-13.0309
3403358	55897	0.00422967	-423.4477	-396.0253	-389.2236	-378.0109	-362.9221	-343.6223	-320.8384	-293.8123	-263.5319	-228.9072	-191.199	-149.1339	-127.9588	-113.6147	-109.8129	-106.5569	-103.548	-100.7811	-95.6917	-87.9193	-82.6226	-72.1108	-66.6141	-60.9632	-55.3788	-53.9389	-52.0504	-48.2786	-46.8561	-44.3906	-41.0432	-38.9152	-35.8164	-34.283	-32.792	-30.1931	-29.4855	-26.5563	-25.3531	-23.5286	-22.3867	-19.3188	-18.3864	-18.0741	-15.216	-14.2662	-12.8858
3435197	56158	0.00421983	-423.6625	-396.2111	-389.3744	-378.106	-362.9434	-343.5511	-320.6587	-293.5058	-263.0837	-228.2993	-190.4181	-148.1714	-127.9679	-113.6084	-109.7667	-106.4029	-102.7449	-100.5985	-95.5757	-87.7832	-82.4836	-71.9193	-66.3803	-60.9673	-54.9668	-53.5739	-51.3859	-48.1216	-46.7599	-44.1363	-40.9615	-38.8188	-35.7027	-34.2432	-32.5463	-30.1055	-29.3985	-26.4554	-25.2462	-23.3305	-22.2943	-19.0362	-18.2689	-17.9679	-15.064	-14.0989	-12.7368
3467409	56420	0.00421	-423.8774	-396.3968	-389.5249	-378.2002	-362.9634	-343.4779	-320.4762	-293.1956	-262.631	-227.6857	-189.6305	-147.2018	-127.9766	-113.6035	-109.7268	-106.3056	-102.0028	-100.301	-95.4406	-87.6453	-82.3424	-71.7271	-66.1482	-60.9712	-54.7028	-53.2665	-50.5707	-47.9426	-46.6532	-43.8507	-40.8729	-38.7219	-35.5891	-34.2025	-32.3017	-30.0172	-29.3099	-26.3541	-25.14	-23.1306	-22.1996	-18.7651	-18.1513	-17.8467	-14.9176	-13.9299	-12.5833
3500000	56685	0.00420016	-424.0922	-396.5824	-389.675	-378.2937	-362.9821	-343.4028	-320.291	-292.8819	-262.1736	-227.0664	-188.836	-146.2253	-127.9847	-113.5994	-109.6908	-106.2393	-101.4586	-99.7904	-95.276	-87.5055	-82.1986	-71.5342	-65.9172	-60.9749	-54.52	-53.0047	-49.7381	-47.7105	-46.5262	-43.5254	-40.7742	-38.6237	-35.4753	-34.1608	-32.0592	-29.9273	-29.2196	-26.2523	-25.0338	-22.9293	-22.1025	-18.5142	-18.0335	-17.7018	-14.7755	-13.7606	-12.4247
3530295	56930	0.00419112	-424.2897	-396.7529	-389.8127	-378.379	-362.9981	-343.3319	-320.1184	-292.5903	-261.7492	-226.4921	-188.0996	-145.3218	-127.9915	-113.5963	-109.6601	-106.1944	-101.1575	-99.1372	-95.0835	-87.3751	-82.0639	-71.3563	-65.7052	-60.978	-54.3941	-52.7839	-49.0866	-47.4113	-46.3681	-43.181	-40.6699	-38.5311	-35.3702	-34.1214	-31.8389	-29.8426	-29.1352	-26.1582	-24.9359	-22.7433	-22.0111	-18.3102	-17.925	-17.5393	-14.6479	-13.6057	-12.2744
3560919	57176	0.00418208	-424.4871	-396.9233	-389.95	-378.4635	-363.0129	-343.2594	-319.9433	-292.2955	-261.3207	-225.9128	-187.3574	-144.4127	-127.9974	-113.5935	-109.6309	-106.159	-100.9692	-98.4163	-94.8281	-87.2424	-81.9263	-71.1777	-65.4933	-60.9808	-54.2949	-52.5706	-48.6318	-47.048	-46.1119	-42.7822	-40.5443	-38.4346	-35.2644	-34.081	-31.622	-29.7553	-29.0491	-26.0635	-24.8372	-22.5565	-21.9176	-18.1368	-17.816	-17.3438	-14.5224	-13.4524	-12.1196
3591876	57424	0.00417304	-424.6846	-397.0936	-390.087	-378.5474	-363.0267	-343.1851	-319.7659	-291.9976	-260.8883	-225.3287	-186.6093	-143.4982	-128.0022	-113.5911	-109.6029	-106.13	-100.8339	-97.7263	-94.4757	-87.107	-81.7855	-70.9984	-65.2811	-60.9831	-54.2147	-52.3594	-48.351	-46.7505	-45.6891	-42.3248	-40.3806	-38.331	-35.1573	-34.0392	-31.4092	-29.6646	-28.9613	-25.9682	-24.7373	-22.3693	-21.8217	-17.9924	-17.7059	-17.1178	-14.3984	-13.3015	-11.9608
3623170	57674	0.004164	-424.882	-397.2639	-390.2237	-378.6306	-363.0392	-343.1092	-319.5861	-291.6966	-260.4518	-224.7395	-185.8551	-142.5786	-128.0056	-113.5888	-109.5757	-106.1053	-100.7241	-97.1358	-93.9888	-86.9684	-81.6408	-70.8182	-65.0685	-60.985	-54.1486	-52.1479	-48.1696	-46.5626	-45.1605	-41.8291	-40.1442	-38.2136	-35.0482	-33.9959	-31.2014	-29.5695	-28.8714	-25.8721	-24.6358	-22.1817	-21.7234	-17.8703	-17.5947	-16.8684	-14.2752	-13.1535	-11.799
3654368	57922	0.00415508	-425.0767	-397.4316	-390.3581	-378.7119	-363.0504	-343.0325	-319.4064	-291.3965	-260.0173	-224.1536	-185.1055	-141.6668	-128.0072	-113.5867	-109.5495	-106.0838	-100.629	-96.6825	-93.36	-86.8276	-81.4935	-70.6398	-64.8581	-60.9863	-54.0938	-51.9382	-48.0397	-46.4338	-44.6467	-41.3686	-39.784	-38.0687	-34.9376	-33.9514	-31.0025	-29.4707	-28.7803	-25.7767	-24.5339	-21.9967	-21.6238	-17.7645	-17.4839	-16.607	-14.1542	-13.0107	-11.6376
3685903	58171	0.00414617	-425.2714	-397.5993	-390.4922	-378.7926	-363.0605	-342.9541	-319.2243	-291.0933	-259.5789	-223.5627	-184.35	-140.7508	-128.0065	-113.5846	-109.5238	-106.0644	-100.5415	-96.3479	-92.6022	-86.6812	-81.3409	-70.4606	-64.6471	-60.987	-54.0469	-51.7275	-47.9354	-46.3296	-44.1872	-41.0115	-39.2794	-37.8518	-34.822	-33.9045	-30.8102	-29.3659	-28.6861	-25.6804	-24.4298	-21.8123	-21.5211	-17.6679	-17.3719	-16.3357	-14.0332	-12.8713	-11.4762
3750000	58675	0.00412834	-425.6608	-397.9344	-390.7595	-378.9518	-363.0772	-342.7921	-318.8529	-290.4773	-258.6898	-222.3659	-182.821	-138.9084	-127.9959	-113.5805	-109.4733	-106.0296	-100.3783	-95.9095	-90.8539	-86.3616	-81.014	-70.0994	-64.2226	-60.9857	-53.9706	-51.3037	-47.7643	-46.1517	-43.4327	-40.5722	-38.4165	-36.7807	-34.5543	-33.7978	-30.4478	-29.1352	-28.4834	-25.4851	-24.213	-21.4516	-21.2994	-17.4901	-17.1446	-15.7772	-13.7897	-12.6024	-11.1609
3811179	59151	0.00411167	-426.0247	-398.2473	-391.0081	-379.0981	-363.0885	-342.6344	-318.4968	-289.8899	-257.844	-221.229	-181.37	-137.1795	-127.9688	-113.5764	-109.427	-105.9996	-100.2329	-95.6398	-89.1377	-85.9929	-80.6695	-69.7583	-63.823	-60.9803	-53.9137	-50.9076	-47.6246	-46.0009	-42.8649	-40.2858	-38.0907	-35.2611	-34.1172	-33.6128	-30.1331	-28.8927	-28.2623	-25.2984	-23.9969	-21.164	-21.033	-17.3327	-16.9281	-15.2477	-13.5583	-12.3622	-10.8834
3842236	59392	0.00410333	-426.2066	-398.4036	-391.132	-379.1703	-363.0926	-342.5531	-318.3156	-289.5919	-257.4157	-220.6538	-180.6364	-136.3161	-127.9454	-113.5742	-109.404	-105.985	-100.1615	-95.5294	-88.32	-85.7495	-80.4753	-69.5864	-63.6224	-60.9754	-53.889	-50.7106	-47.5573	-45.9282	-42.6142	-40.1512	-37.9834	-34.7779	-33.8364	-33.218	-29.9786	-28.7627	-28.1292	-25.2031	-23.8823	-21.0465	-20.8699	-17.2553	-16.8184	-14.983	-13.4404	-12.2455	-10.7519
3873611	59634	0.004095	-426.3885	-398.5598	-391.2555	-379.2419	-363.0957	-342.4703	-318.1321	-289.291	-256.9836	-220.0741	-179.8975	-135.4565	-127.9125	-113.5719	-109.381	-105.9705	-100.0905	-95.4288	-87.5844	-85.4255	-80.2595	-69.4134	-63.4217	-60.9686	-53.8662	-50.5151	-47.4902	-45.8564	-42.3809	-40.0149	-37.8892	-34.524	-33.7143	-32.4377	-29.8173	-28.628	-27.9683	-25.1062	-23.7619	-20.9347	-20.6985	-17.1781	-16.7075	-14.7193	-13.3207	-12.1308	-10.6249
3904734	59873	0.00408682	-426.5671	-398.7131	-391.3765	-379.3116	-363.0976	-342.3874	-317.9498	-288.9926	-256.5558	-219.5004	-179.1665	-134.6196	-127.8672	-113.5694	-109.3586	-105.9562	-100.0211	-95.3366	-86.995	-84.987	-80.0188	-69.2425	-63.2246	-60.9595	-53.8453	-50.3249	-47.4236	-45.7866	-42.1671	-39.8764	-37.8038	-34.3617	-33.6427	-31.587	-29.6364	-28.4921	-27.7633	-25.0088	-23.6364	-20.826	-20.5266	-17.1024	-16.5974	-14.462	-13.2009	-12.0198	-10.5039
3936171	60113	0.00407863	-426.7458	-398.8663	-391.4972	-379.3806	-363.0985	-342.303	-317.7653	-288.6915	-256.1243	-218.9222	-178.4303	-133.7952	-127.8038	-113.5667	-109.3361	-105.9417	-99.9518	-95.2491	-86.5605	-84.4199	-79.7381	-69.0705	-63.0282	-60.9473	-53.8257	-50.1372	-47.3555	-45.717	-41.9672	-39.7312	-37.7229	-34.2304	-33.5818	-30.8245	-29.4023	-28.3524	-27.4751	-24.9081	-23.501	-20.7169	-20.3525	-17.0265	-16.4862	-14.2071	-13.0783	-11.9101	-10.3859
3967925	60355	0.00407045	-426.9243	-399.0194	-391.6177	-379.449	-363.0983	-342.2169	-317.5787	-288.3874	-255.6892	-218.3395	-177.6887	-132.9915	-127.7142	-113.5637	-109.3136	-105.927	-99.8824	-95.1652	-86.2488	-83.7733	-79.4019	-68.8973	-62.8332	-60.9311	-53.8072	-49.9526	-47.2851	-45.6475	-41.7807	-39.5781	-37.6448	-34.1121	-33.5236	-30.2743	-29.0881	-28.2072	-27.0459	-24.8021	-23.3505	-20.6066	-20.1766	-16.9502	-16.3737	-13.9553	-12.9524	-11.8016	-10.2702
4000000	60599	0.00406226	-427.1029	-399.1725	-391.7378	-379.5168	-363.0971	-342.1293	-317.3899	-288.0805	-255.2505	-217.7524	-176.9417	-132.221	-127.5858	-113.5604	-109.2911	-105.912	-99.813	-95.0837	-86.0116	-83.1167	-78.9906	-68.7227	-62.6407	-60.9095	-53.7895	-49.7717	-47.2116	-45.5778	-41.6069	-39.4162	-37.5686	-34.0003	-33.4654	-29.948	-28.7542	-28.054	-26.4352	-24.6849	-23.1752	-20.495	-19.999	-16.8734	-16.26	-13.7073	-12.8223	-11.6939	-10.156
4030434	60829	0.00405457	-427.2707	-399.3162	-391.8503	-379.5799	-363.095	-342.0456	-317.2105	-287.7895	-254.8349	-217.1965	-176.235	-131.5441	-127.4131	-113.5571	-109.27	-105.8975	-99.7477	-95.0089	-85.8269	-82.5391	-78.5178	-68.5572	-62.4635	-60.8826	-53.7736	-49.6058	-47.1392	-45.5118	-41.4548	-39.2557	-37.4983	-33.8985	-33.4097	-29.7588	-28.5022	-27.9024	-25.7449	-24.5492	-22.9687	-20.3887	-19.83	-16.8004	-16.1518	-13.4787	-12.6951	-11.5933	-10.0495
4061158	61060	0.00404688	-427.4385	-399.4598	-391.9626	-379.6424	-363.0919	-341.9604	-317.0291	-287.4959	-254.416	-216.6367	-175.5234	-130.9346	-127.1682	-113.5533	-109.2488	-105.8826	-99.6822	-94.9352	-85.6634	-82.0276	-77.9501	-68.3902	-62.292	-60.8471	-53.7582	-49.4445	-47.0629	-45.4453	-41.3127	-39.0874	-37.4288	-33.7987	-33.352	-29.622	-28.3159	-27.7464	-25.0961	-24.3333	-22.6806	-20.2809	-19.6583	-16.7266	-16.0424	-13.2555	-12.5618	-11.4929	-9.9434
4092176	61293	0.00403919	-427.6062	-399.6033	-392.0747	-379.7044	-363.0879	-341.8738	-316.8457	-287.1997	-253.9939	-216.0727	-174.807	-130.4156	-126.8281	-113.5491	-109.2275	-105.8673	-99.6165	-94.8624	-85.5129	-81.5911	-77.2876	-68.2214	-62.1287	-60.8	-53.7433	-49.2884	-46.982	-45.378	-41.1801	-38.9115	-37.3598	-33.7005	-33.2918	-29.5109	-28.1727	-27.5896	-24.7038	-23.9491	-22.2347	-20.1715	-19.4821	-16.6517	-15.9316	-13.0391	-12.4206	-11.3925	-9.8373
4123490	61527	0.0040315	-427.7739	-399.7468	-392.1864	-379.7658	-363.0829	-341.7858	-316.6604	-286.9008	-253.5684	-215.5047	-174.0858	-130.0028	-126.3772	-113.5445	-109.2061	-105.8513	-99.5505	-94.7901	-85.3706	-81.2245	-76.5413	-68.0505	-61.9769	-60.7378	-53.7288	-49.1381	-46.896	-45.3097	-41.0561	-38.7289	-37.2911	-33.6039	-33.2281	-29.4141	-28.0547	-27.4342	-24.5142	-23.5478	-21.569	-20.0604	-19.297	-16.5752	-15.8194	-12.831	-12.2693	-11.2917	-9.7307
4154671	61759	0.00402391	-427.9393	-399.8882	-392.2963	-379.8257	-363.0771	-341.6975	-316.4756	-286.6035	-253.1454	-214.9403	-173.3696	-129.6981	-125.8256	-113.5392	-109.1849	-105.8351	-99.4852	-94.7192	-85.2356	-80.9188	-75.7394	-67.8794	-61.8422	-60.6574	-53.7147	-48.9962	-46.8059	-45.2411	-40.9413	-38.543	-37.2233	-33.5106	-33.161	-29.3271	-27.953	-27.2831	-24.3862	-23.2547	-20.7489	-19.9483	-19.0938	-16.4977	-15.7073	-12.635	-12.1082	-11.1915	-9.625
4186148	61993	0.00401633	-428.1047	-400.0295	-392.406	-379.8851	-363.0702	-341.6078	-316.2888	-286.3035	-252.7191	-214.3719	-172.6485	-129.4786	-125.1845	-113.5333	-109.1635	-105.8181	-99.4196	-94.6484	-85.1041	-80.6554	-74.8882	-67.7053	-61.7254	-60.5546	-53.7008	-48.8611	-46.7101	-45.1709	-40.8333	-38.3524	-37.1552	-33.4198	-33.0885	-29.2457	-27.8603	-27.1346	-24.276	-23.0333	-19.9238	-19.8061	-18.8244	-16.4165	-15.5936	-12.4487	-11.9337	-11.0897	-9.5184
4250000	62464	0.00400116	-428.4355	-400.3119	-392.6244	-380.0022	-363.0537	-341.4241	-315.9093	-285.6957	-251.8566	-213.2228	-171.192	-129.2122	-123.7184	-113.5187	-109.1203	-105.7818	-99.2875	-94.5067	-84.848	-80.2136	-73.0918	-67.3435	-61.5495	-60.2751	-53.6735	-48.6128	-46.5011	-45.0245	-40.6339	-37.9621	-37.0163	-33.2486	-32.9232	-29.0931	-27.6911	-26.8452	-24.0721	-22.6826	-19.6154	-18.8827	-17.5045	-16.2193	-15.3605	-12.0975	-11.5449	-10.8759	-9.302
4311429	62914	0.00398683	-428.7478	-400.5783	-392.8297	-380.1105	-363.0344	-341.2453	-315.5435	-285.112	-251.0297	-212.1224	-169.7984	-129.0804	-122.202	-113.4999	-109.0786	-105.7441	-99.1614	-94.3719	-84.6109	-79.859	-71.3434	-66.9733	-61.4429	-59.926	-53.6479	-48.4057	-46.2837	-44.8764	-40.4615	-37.5922	-36.8768	-33.101	-32.7384	-28.9562	-27.5426	-26.5812	-23.885	-22.3915	-19.3951	-18.4898	-16.2989	-15.4748	-15.1171	-11.768	-11.1407	-10.6369	-9.0927
4373972	63368	0.0039725	-429.06	-400.8443	-393.0339	-380.2168	-363.0116	-341.0612	-315.1704	-284.5186	-250.1905	-211.0069	-168.3871	-129.0073	-120.6198	-113.4728	-109.0357	-105.7021	-99.0339	-94.2356	-84.376	-79.5378	-69.6214	-66.5396	-61.3717	-59.5063	-53.6219	-48.2244	-46.0515	-44.7148	-40.3003	-37.24	-36.7154	-32.9641	-32.5264	-28.8229	-27.4004	-26.326	-23.6976	-22.1112	-19.1716	-18.1565	-16.0536	-14.9192	-13.8472	-11.4026	-10.7557	-10.2473	-8.8779
4405061	63593	0.00396547	-429.2131	-400.9747	-393.1337	-380.2681	-362.9992	-340.9689	-314.9848	-284.2241	-249.7745	-210.4543	-167.6885	-128.9844	-119.8308	-113.4547	-109.014	-105.6796	-98.9708	-94.168	-84.2612	-79.3878	-68.8251	-66.2755	-61.3436	-59.2756	-53.6088	-48.1441	-45.9343	-44.6292	-40.2243	-37.0844	-36.6191	-32.8992	-32.4133	-28.758	-27.3321	-26.204	-23.605	-21.9748	-19.0607	-17.9988	-15.9689	-14.8012	-13.1685	-11.1995	-10.6049	-9.9253	-8.7704
4436427	63819	0.00395844	-429.3662	-401.1049	-393.2332	-380.3189	-362.9858	-340.8753	-314.7973	-283.9271	-249.3555	-209.898	-166.9855	-128.9673	-119.038	-113.4316	-108.9916	-105.6555	-98.9073	-94.0998	-84.1465	-79.2413	-68.0994	-65.9448	-61.3174	-59.0272	-53.5955	-48.0688	-45.8162	-44.5385	-40.1498	-36.9476	-36.5046	-32.8352	-32.2945	-28.6933	-27.2646	-26.0841	-23.5117	-21.8382	-18.949	-17.843	-15.888	-14.6832	-12.6149	-10.9823	-10.4753	-9.4908	-8.6613
4468072	64046	0.00395142	-429.5192	-401.2351	-393.3325	-380.3691	-362.9716	-340.7805	-314.608	-283.6278	-248.9334	-209.338	-166.2782	-128.9548	-118.2457	-113.4011	-108.9686	-105.6296	-98.8434	-94.0309	-84.0318	-79.0973	-67.4861	-65.5111	-61.2908	-58.7588	-53.5817	-47.9982	-45.6985	-44.442	-40.0766	-36.8324	-36.3697	-32.7716	-32.1703	-28.6285	-27.1976	-25.9661	-23.4175	-21.7012	-18.8365	-17.6884	-15.8084	-14.5642	-12.1921	-10.7613	-10.3548	-8.9521	-8.5507
4500000	64275	0.00394439	-429.6723	-401.3652	-393.4315	-380.4189	-362.9564	-340.6843	-314.4169	-283.3261	-248.5083	-208.7743	-165.5665	-128.9459	-117.4595	-113.359	-108.9446	-105.6016	-98.7791	-93.9612	-83.9171	-78.9552	-67.0102	-64.9569	-61.2613	-58.4667	-53.5674	-47.9318	-45.5821	-44.3392	-40.0042	-36.7363	-36.2173	-32.7081	-32.0406	-28.5634	-27.1311	-25.8502	-23.3224	-21.5636	-18.7234	-17.5348	-15.7292	-14.4438	-11.8744	-10.5502	-10.2334	-8.4384	-8.3405
4529658	64486	0.00393792	-429.8132	-401.485	-393.5224	-380.4642	-362.9417	-340.5945	-314.2393	-283.0461	-248.1141	-208.2517	-164.9071	-128.9403	-116.7486	-113.3035	-108.9213	-105.5735	-98.7194	-93.8963	-83.8114	-78.8257	-66.6772	-64.3647	-61.228	-58.1722	-53.5535	-47.8738	-45.477	-44.2382	-39.9382	-36.6599	-36.0665	-32.6495	-31.9164	-28.5032	-27.0702	-25.745	-23.2338	-21.4363	-18.6187	-17.3941	-15.656	-14.3316	-11.6447	-10.3754	-10.1119	-8.3334	-7.7486
4559560	64699	0.00393144	-429.9541	-401.6047	-393.6131	-380.509	-362.9262	-340.5036	-314.0601	-282.764	-247.7174	-207.726	-164.2441	-128.9367	-116.0631	-113.2206	-108.8966	-105.5428	-98.6593	-93.8307	-83.7055	-78.697	-66.4119	-63.7394	-61.183	-57.8478	-53.5387	-47.8185	-45.3746	-44.1309	-39.8727	-36.5913	-35.9099	-32.5906	-31.7875	-28.4424	-27.0094	-25.6414	-23.1444	-21.3083	-18.5135	-17.2539	-15.5824	-14.218	-11.453	-10.2263	-9.9737	-8.227	-7.4175
4589710	64912	0.00392497	-430.095	-401.7243	-393.7036	-380.5534	-362.91	-340.4116	-313.8793	-282.4799	-247.3179	-207.1971	-163.5772	-128.9348	-115.4256	-113.0892	-108.8699	-105.5088	-98.5987	-93.7642	-83.5995	-78.5688	-66.1876	-63.1261	-61.1154	-57.487	-53.5226	-47.7657	-45.2754	-44.0171	-39.8074	-36.5278	-35.7505	-32.5314	-31.6541	-28.3811	-26.9489	-25.5393	-23.0539	-21.1797	-18.4079	-17.1143	-15.5082	-14.103	-11.2852	-10.1014	-9.8184	-8.1191	-7.2927
4620109	65127	0.0039185	-430.2359	-401.8438	-393.7939	-380.5973	-362.8929	-340.3184	-313.6969	-282.1937	-246.9159	-206.6649	-162.9067	-128.9343	-114.875	-112.8724	-108.8403	-105.4708	-98.5377	-93.6968	-83.4934	-78.4411	-65.9877	-62.5717	-61.0031	-57.0825	-53.5046	-47.7148	-45.1797	-43.8966	-39.7421	-36.4677	-35.5903	-32.4717	-31.5159	-28.3191	-26.8884	-25.4385	-22.9623	-21.0504	-18.3019	-16.9753	-15.4333	-13.9866	-11.1327	-9.9923	-9.6529	-8.0096	-7.1675
4650298	65339	0.00391212	-430.3746	-401.9615	-393.8825	-380.6401	-362.8754	-340.2255	-313.5158	-281.9097	-246.5173	-206.1375	-162.2424	-128.935	-114.4621	-112.5335	-108.8071	-105.4283	-98.477	-93.6294	-83.3886	-78.3154	-65.8055	-62.1369	-60.8123	-56.6348	-53.4841	-47.6662	-45.0891	-43.7715	-39.6778	-36.4108	-35.4328	-32.4123	-31.3753	-28.2572	-26.8288	-25.3407	-22.8709	-20.9224	-18.1973	-16.8389	-15.3587	-13.8705	-10.9924	-9.893	-9.4857	-7.9002	-7.0434
4680733	65553	0.00390575	-430.5133	-402.0791	-393.971	-380.6825	-362.8571	-340.1314	-313.333	-281.6237	-246.116	-205.6069	-161.5745	-128.9367	-114.1899	-112.0623	-108.7675	-105.3793	-98.4158	-93.561	-83.2836	-78.1897	-65.6326	-61.8502	-60.5161	-56.134	-53.4589	-47.6189	-45.002	-43.6401	-39.6132	-36.3556	-35.2764	-32.3524	-31.2302	-28.1943	-26.7693	-25.244	-22.7784	-20.7938	-18.0923	-16.703	-15.2832	-13.7529	-10.8588	-9.7976	-9.3175	-7.7893	-6.9183
4711418	65767	0.00389937	-430.652	-402.1966	-394.0592	-380.7244	-362.838	-340.0363	-313.1487	-281.3356	-245.7122	-205.0731	-160.9029	-128.9391	-114.0237	-111.4999	-108.7174	-105.3215	-98.3539	-93.4914	-83.1784	-78.0639	-65.4658	-61.6883	-60.1446	-55.5811	-53.4247	-47.5724	-44.9183	-43.5029	-39.5483	-36.3015	-35.1218	-32.2919	-31.0806	-28.1303	-26.7096	-25.1485	-22.6846	-20.6645	-17.9872	-16.5678	-15.2067	-13.6339	-10.7297	-9.7042	-9.1495	-7.6767	-6.7924
4742355	65983	0.003893	-430.7907	-402.314	-394.1472	-380.7658	-362.8182	-339.9399	-312.9628	-281.0455	-245.3058	-204.5361	-160.2276	-128.9423	-113.9208	-110.9007	-108.6487	-105.2518	-98.2912	-93.4204	-83.0729	-77.9379	-65.3032	-61.5985	-59.7522	-54.9878	-53.3708	-47.5263	-44.8378	-43.3601	-39.4828	-36.2484	-34.9693	-32.2307	-30.9268	-28.065	-26.6498	-25.0541	-22.5896	-20.5347	-17.8819	-16.4332	-15.1291	-13.5135	-10.6039	-9.6116	-8.982	-7.5624	-6.6655
4773546	66200	0.00388662	-430.9293	-402.4314	-394.2349	-380.8067	-362.7976	-339.8424	-312.7754	-280.7532	-244.8967	-203.9959	-159.5486	-128.9461	-113.8534	-110.315	-108.5442	-105.1651	-98.2278	-93.3481	-82.9671	-77.8114	-65.1436	-61.5453	-59.3717	-54.3936	-53.2627	-47.4799	-44.76	-43.2121	-39.4166	-36.196	-34.8192	-32.1689	-30.7688	-27.9982	-26.5898	-24.9607	-22.4931	-20.4043	-17.7765	-16.2993	-15.0505	-13.3916	-10.4806	-9.5191	-8.8153	-7.4465	-6.5376
4789250	66308	0.00388343	-430.9987	-402.4901	-394.2787	-380.827	-362.787	-339.7932	-312.681	-280.6062	-244.691	-203.7243	-159.2074	-128.9481	-113.828	-110.0443	-108.4685	-105.1131	-98.1957	-93.3112	-82.9141	-77.748	-65.0645	-61.5266	-59.19	-54.1288	-53.1576	-47.4564	-44.722	-43.1362	-39.3832	-36.17	-34.745	-32.1376	-30.6882	-27.9641	-26.5596	-24.9143	-22.4443	-20.3388	-17.7237	-16.2325	-15.0107	-13.3301	-10.4195	-9.4727	-8.7323	-7.3879	-6.4732
4804994	66417	0.00388025	-431.0679	-402.5487	-394.3224	-380.8472	-362.7762	-339.7438	-312.5863	-280.4588	-244.4849	-203.4523	-158.8658	-128.9503	-113.8066	-109.8001	-108.3695	-105.0539	-98.1634	-93.274	-82.8611	-77.6845	-64.986	-61.5113	-59.0149	-53.9179	-52.9884	-47.4326	-44.6847	-43.0593	-39.3496	-36.1441	-34.6716	-32.1063	-30.6068	-27.9297	-26.5294	-24.8682	-22.3952	-20.2733	-17.671	-16.1661	-14.9706	-13.2683	-10.359	-9.4263	-8.6495	-7.3289	-6.4087
4820827	66527	0.00387706	-431.1373	-402.6073	-394.3661	-380.8672	-362.7652	-339.694	-312.4911	-280.3107	-244.2779	-203.1791	-158.5227	-128.9526	-113.7881	-109.5902	-108.241	-104.9855	-98.1308	-93.2363	-82.8079	-77.6208	-64.9077	-61.4987	-58.8459	-53.7734	-52.7425	-47.4082	-44.6478	-42.981	-39.3157	-36.1183	-34.5987	-32.0747	-30.5244	-27.8946	-26.4991	-24.8222	-22.3456	-20.2076	-17.6182	-16.0998	-14.9302	-13.2061	-10.2987	-9.3796	-8.5668	-7.2694	-6.3438
4836701	66636	0.00387387	-431.2066	-402.6659	-394.4097	-380.8872	-362.754	-339.644	-312.3956	-280.1624	-244.0705	-202.9055	-158.1792	-128.955	-113.7722	-109.4202	-108.0808	-104.9063	-98.0979	-93.1982	-82.7548	-77.5571	-64.8298	-61.4883	-58.6832	-53.6831	-52.4345	-47.3831	-44.6114	-42.9018	-39.2815	-36.0927	-34.5266	-32.043	-30.4413	-27.8592	-26.4687	-24.7765	-22.2957	-20.1419	-17.5655	-16.0337	-14.8895	-13.1436	-10.2388	-9.3329	-8.4844	-7.2096	-6.2787
4868670	66856	0.0038675	-431.3451	-402.783	-394.4968	-380.9267	-362.731	-339.543	-312.2033	-279.8637	-243.6533	-202.3553	-157.4889	-128.96	-113.7459	-109.1897	-107.686	-104.7049	-98.031	-93.1202	-82.6481	-77.4289	-64.6746	-61.4719	-58.3742	-53.5862	-51.7138	-47.3295	-44.5397	-42.74	-39.2121	-36.0416	-34.3843	-31.9789	-30.2724	-27.7864	-26.4076	-24.6856	-22.1947	-20.0099	-17.4601	-15.9022	-14.8071	-13.0175	-10.1197	-9.2385	-8.32	-7.0885	-6.1478
4901094	67078	0.00386109	-431.4845	-402.9008	-394.5841	-380.9659	-362.7071	-339.4402	-312.0082	-279.5612	-243.231	-201.7986	-156.7907	-128.9653	-113.7249	-109.0572	-107.2589	-104.4258	-97.9621	-93.0394	-82.5405	-77.2993	-64.5192	-61.4599	-58.0827	-53.5343	-50.9245	-47.2681	-44.4688	-42.5728	-39.1407	-35.9904	-34.2439	-31.9136	-30.0998	-27.7105	-26.3454	-24.5948	-22.0913	-19.8767	-17.354	-15.7709	-14.7227	-12.8892	-10.0008	-9.1426	-8.1552	-6.9649	-6.015
4933789	67301	0.00385467	-431.6239	-403.0185	-394.6712	-381.0047	-362.6823	-339.3362	-311.8114	-279.2565	-242.8059	-201.2384	-156.0887	-128.9708	-113.7077	-108.975	-106.874	-104.0494	-97.891	-92.9558	-82.4326	-77.1689	-64.3642	-61.451	-57.8071	-53.499	-50.1131	-47.1923	-44.3985	-42.401	-39.0673	-35.9395	-34.106	-31.8475	-29.925	-27.6316	-26.2826	-24.5045	-21.9861	-19.7431	-17.2481	-15.6407	-14.6368	-12.7596	-9.8826	-9.0453	-7.991	-6.8394	-5.881
4966757	67526	0.00384826	-431.7632	-403.136	-394.758	-381.0429	-362.6568	-339.231	-311.613	-278.9495	-242.378	-200.6748	-155.3829	-128.9764	-113.6932	-108.918	-106.5648	-103.5695	-97.8172	-92.8688	-82.3243	-77.0376	-64.2095	-61.4442	-57.5444	-53.471	-49.3111	-47.0858	-44.328	-42.2242	-38.9917	-35.8886	-33.9706	-31.7806	-29.7485	-27.5492	-26.2188	-24.4146	-21.879	-19.609	-17.1423	-15.5115	-14.5492	-12.6286	-9.7651	-8.9467	-7.8273	-6.7121	-5.7459
5000000	67752	0.00384185	-431.9025	-403.2535	-394.8446	-381.0807	-362.6304	-339.1245	-311.4129	-278.6404	-241.9473	-200.1078	-154.6733	-128.9822	-113.6808	-108.8744	-106.3318	-102.9998	-97.7398	-92.7779	-82.2156	-76.9053	-64.0549	-61.4391	-57.2921	-53.4465	-48.5696	-46.9075	-44.2563	-42.0415	-38.9131	-35.8379	-33.8375	-31.7128	-29.5713	-27.4627	-26.154	-24.3251	-21.7699	-19.4744	-17.0367	-15.3836	-14.46	-12.4964	-9.6482	-8.8465	-7.664	-6.5828	-5.6097
5014734	67851	0.00383902	-431.9639	-403.3053	-394.8826	-381.0972	-362.6185	-339.0772	-311.3242	-278.5035	-241.7566	-199.8569	-154.3594	-128.9847	-113.6758	-108.858	-106.2493	-102.7265	-97.7042	-92.7364	-82.1676	-76.8467	-63.9868	-61.4372	-57.1837	-53.4363	-48.2866	-46.784	-44.2239	-41.9587	-38.8774	-35.8155	-33.7795	-31.6826	-29.4932	-27.4232	-26.125	-24.2857	-21.7211	-19.415	-16.9902	-15.3276	-14.4201	-12.4377	-9.5969	-8.8018	-7.5922	-6.5253	-5.5493
5029521	67951	0.0038362	-432.0252	-403.357	-394.9206	-381.1136	-362.6064	-339.0297	-311.2351	-278.3661	-241.5655	-199.6054	-154.0448	-128.9873	-113.6711	-108.8428	-106.1769	-102.4428	-97.6674	-92.6939	-82.1195	-76.7879	-63.9187	-61.4356	-57.0768	-53.4263	-48.0459	-46.6186	-44.1905	-41.8743	-38.841	-35.7931	-33.722	-31.6523	-29.4152	-27.3827	-26.0957	-24.2464	-21.6719	-19.3556	-16.9437	-15.272	-14.3799	-12.3788	-9.5457	-8.7568	-7.5204	-6.4674	-5.4887
5044364	68051	0.00383337	-432.0866	-403.4087	-394.9586	-381.1298	-362.5942	-338.9819	-311.1458	-278.2284	-241.3737	-199.3531	-153.7295	-128.9899	-113.6667	-108.8285	-106.1131	-102.1505	-97.6293	-92.6503	-82.0714	-76.7288	-63.8506	-61.4341	-56.9713	-53.4164	-47.8544	-46.4055	-44.1557	-41.788	-38.8036	-35.7707	-33.6648	-31.6218	-29.3374	-27.3412	-26.0661	-24.2071	-21.6223	-19.296	-16.8973	-15.2165	-14.3392	-12.3197	-9.4946	-8.7114	-7.4487	-6.4092	-5.4278
5059261	68152	0.00383055	-432.1479	-403.4604	-394.9965	-381.146	-362.5818	-338.9339	-311.0561	-278.0901	-241.1814	-199.1002	-153.4134	-128.9924	-113.6624	-108.8151	-106.0564	-101.8517	-97.5896	-92.6055	-82.0231	-76.6696	-63.7825	-61.4328	-56.8671	-53.4066	-47.7099	-46.1481	-44.119	-41.6994	-38.7653	-35.7483	-33.608	-31.5911	-29.2599	-27.2986	-26.0361	-24.1677	-21.5723	-19.2363	-16.8509	-15.1614	-14.2983	-12.2603	-9.4436	-8.6657	-7.3771	-6.3505	-5.3667
5089221	68353	0.0038249	-432.2706	-403.5638	-395.0722	-381.1781	-362.5566	-338.8372	-310.8757	-277.8124	-240.7952	-198.5923	-152.779	-128.9975	-113.6545	-108.7903	-105.9604	-101.2414	-97.504	-92.5118	-81.9264	-76.5503	-63.6461	-61.4306	-56.6621	-53.3869	-47.5232	-45.548	-44.0341	-41.5138	-38.6852	-35.7034	-33.4953	-31.5292	-29.1061	-27.2101	-25.975	-24.089	-21.4707	-19.1168	-16.7583	-15.052	-14.2151	-12.1409	-9.3419	-8.5731	-7.234	-6.2321	-5.2437
5119403	68556	0.00381925	-432.3933	-403.667	-395.1477	-381.2097	-362.5307	-338.7395	-310.6939	-277.5329	-240.4067	-198.0817	-152.1417	-129.0025	-113.6471	-108.7674	-105.8818	-100.6251	-97.4067	-92.4115	-81.8293	-76.4301	-63.5095	-61.429	-56.4612	-53.3668	-47.4123	-44.9246	-43.9114	-41.3125	-38.5991	-35.6582	-33.3836	-31.4665	-28.9547	-27.1167	-25.9119	-24.01	-21.3671	-18.9969	-16.6659	-14.9438	-14.1304	-12.0206	-9.2407	-8.4791	-7.091	-6.1122	-5.1197
5134685	68658	0.00381641	-432.455	-403.719	-395.1856	-381.2255	-362.5174	-338.6899	-310.6019	-277.3915	-240.2103	-197.8236	-151.8197	-129.005	-113.6436	-108.7565	-105.8471	-100.3168	-97.3513	-92.3581	-81.7803	-76.3692	-63.4407	-61.4283	-56.3615	-53.3564	-47.3712	-44.6424	-43.8121	-41.2028	-38.5528	-35.6354	-33.3277	-31.4346	-28.8795	-27.0678	-25.8792	-23.9701	-21.3142	-18.9365	-16.6194	-14.8898	-14.0871	-11.9597	-9.1899	-8.4311	-7.0191	-6.0513	-5.0569
5150000	68760	0.00381356	-432.5167	-403.7709	-395.2235	-381.2412	-362.504	-338.6401	-310.5096	-277.2497	-240.0134	-197.565	-151.4971	-129.0075	-113.6402	-108.7459	-105.815	-100.0127	-97.2901	-92.3024	-81.7312	-76.308	-63.3719	-61.4277	-56.2627	-53.3458	-47.3361	-44.4135	-43.6625	-41.0858	-38.5041	-35.6125	-33.272	-31.4026	-28.8054	-27.0175	-25.8459	-23.9302	-21.2608	-18.876	-16.5729	-14.8361	-14.0434	-11.8987	-9.1393	-8.3828	-6.9472	-5.99	-4.9939
5165421	68863	0.00381072	-432.5785	-403.8229	-395.2613	-381.2568	-362.4903	-338.59	-310.4168	-277.1073	-239.8156	-197.3052	-151.1733	-129.0099	-113.637	-108.7356	-105.7852	-99.7144	-97.2213	-92.244	-81.682	-76.2465	-63.3029	-61.4272	-56.1647	-53.335	-47.3054	-44.2528	-43.4509	-40.9593	-38.4523	-35.5894	-33.2164	-31.3703	-28.7321	-26.9658	-25.8118	-23.8901	-21.2067	-18.8153	-16.5265	-14.7827	-13.9992	-11.8373	-9.0886	-8.334	-6.8753	-5.9283	-4.9305
5180849	68966	0.00380787	-432.6402	-403.8747	-395.299	-381.2723	-362.4765	-338.5398	-310.3239	-276.9648	-239.6178	-197.0454	-150.8496	-129.0123	-113.6338	-108.7256	-105.7574	-99.4262	-97.1431	-92.1828	-81.6328	-76.1849	-63.2341	-61.4267	-56.0677	-53.3238	-47.2779	-44.1482	-43.1951	-40.8218	-38.3969	-35.5663	-33.161	-31.3379	-28.66	-26.9128	-25.7769	-23.8499	-21.1521	-18.7546	-16.4802	-14.7297	-13.9547	-11.7759	-9.0382	-8.2849	-6.8036	-5.8663	-4.867
5211917	69172	0.00380219	-432.7636	-403.9785	-395.3744	-381.3029	-362.4484	-338.4384	-310.1369	-276.678	-239.2199	-196.523	-150.1991	-129.0169	-113.6277	-108.7061	-105.7064	-98.8911	-96.9458	-92.0499	-81.5339	-76.0605	-63.096	-61.426	-55.876	-53.3003	-47.2296	-44.0212	-42.6501	-40.5035	-38.2705	-35.5194	-33.05	-31.2723	-28.5193	-26.8028	-25.7041	-23.7688	-21.041	-18.633	-16.3877	-14.6247	-13.8642	-11.6524	-8.9376	-8.1854	-6.66	-5.7411	-4.739
5243219	69380	0.0037965	-432.887	-404.0822	-395.4496	-381.3331	-362.4197	-338.336	-309.9484	-276.3894	-238.8197	-195.9978	-149.5457	-129.0213	-113.6218	-108.6874	-105.6604	-98.4394	-96.6724	-91.8997	-81.4345	-75.9348	-62.9577	-61.4254	-55.6876	-53.275	-47.1874	-43.9361	-42.1547	-40.1187	-38.1121	-35.4716	-32.9387	-31.2059	-28.3839	-26.6879	-25.6263	-23.6869	-20.9273	-18.511	-16.2952	-14.521	-13.772	-11.5282	-8.8373	-8.0842	-6.5164	-5.6143	-4.6098
5274756	69588	0.00379081	-433.0104	-404.1858	-395.5245	-381.3629	-362.3902	-338.2326	-309.7585	-276.0989	-238.4172	-195.4697	-148.8893	-129.0254	-113.6162	-108.6692	-105.6181	-98.0935	-96.3072	-91.7268	-81.3347	-75.8077	-62.8192	-61.4249	-55.5027	-53.2473	-47.1491	-43.8656	-41.7488	-39.683	-37.8977	-35.4222	-32.8262	-31.1386	-28.2541	-26.5689	-25.5424	-23.6036	-20.8106	-18.3886	-16.203	-14.4187	-13.678	-11.4033	-8.7374	-7.9813	-6.3729	-5.4861	-4.4795
5306531	69797	0.00378513	-433.1337	-404.2893	-395.5993	-381.3923	-362.36	-338.1282	-309.5672	-275.8066	-238.0123	-194.9387	-148.2301	-129.0291	-113.6108	-108.6515	-105.5788	-97.8461	-95.8659	-91.524	-81.2344	-75.6792	-62.6805	-61.4245	-55.3215	-53.2167	-47.1134	-43.8018	-41.4277	-39.2521	-37.5887	-35.3702	-32.7117	-31.0703	-28.13	-26.4473	-25.4507	-23.5188	-20.6908	-18.2658	-16.1109	-14.3177	-13.5823	-11.2777	-8.6378	-7.8768	-6.2294	-5.3564	-4.3479
5338546	70008	0.00377944	-433.2571	-404.3928	-395.6738	-381.4213	-362.3292	-338.0227	-309.3745	-275.5124	-237.605	-194.4049	-147.5679	-129.0325	-113.6055	-108.6341	-105.5418	-97.668	-95.3874	-91.2823	-81.1335	-75.5492	-62.5417	-61.4239	-55.1446	-53.1824	-47.0797	-43.7413	-41.1689	-38.8923	-37.1504	-35.3131	-32.5936	-31.0011	-28.0117	-26.3249	-25.3492	-23.4318	-20.5676	-18.1425	-16.0189	-14.218	-13.4848	-11.1515	-8.5384	-7.7706	-6.0859	-5.2253	-4.2152
5370802	70219	0.00377375	-433.3804	-404.4962	-395.7482	-381.4498	-362.2976	-337.9163	-309.1804	-275.2164	-237.1954	-193.8682	-146.903	-129.0354	-113.6003	-108.6171	-105.5064	-97.5324	-94.9099	-90.9913	-81.032	-75.4174	-62.4028	-61.4231	-54.9727	-53.1435	-47.0474	-43.6829	-40.9514	-38.6245	-36.5951	-35.2441	-32.4696	-30.9309	-27.8989	-26.2039	-25.236	-23.3422	-20.4406	-18.0188	-15.927	-14.1195	-13.3857	-11.0248	-8.4392	-7.6628	-5.9423	-5.0927	-4.0811
5402743	70427	0.00376816	-433.5015	-404.5978	-395.821	-381.4775	-362.2659	-337.8106	-308.9882	-274.9236	-236.7905	-193.3378	-146.2469	-129.0378	-113.5953	-108.6006	-105.473	-97.4237	-94.4687	-90.6474	-80.9316	-75.2861	-62.2664	-61.422	-54.8095	-53.0998	-47.0167	-43.6265	-40.7642	-38.4281	-36.0032	-35.14	-32.3383	-30.8608	-27.7928	-26.0886	-25.1115	-23.2506	-20.3116	-17.8967	-15.8367	-14.0238	-13.2867	-10.8997	-8.3419	-7.5554	-5.8012	-4.961	-3.9481
5434921	70637	0.00376257	-433.6227	-404.6993	-395.8936	-381.5047	-362.2335	-337.7039	-308.7946	-274.6289	-236.3833	-192.8046	-145.5881	-129.0395	-113.5904	-108.5844	-105.4407	-97.33	-94.0722	-90.2393	-80.8305	-75.1529	-62.1305	-61.42	-54.6531	-53.0493	-46.9867	-43.5709	-40.5951	-38.2703	-35.5204	-34.8896	-32.1912	-30.7897	-27.6908	-25.9787	-24.9727	-23.1547	-20.178	-17.7741	-15.7465	-13.9292	-13.1862	-10.7742	-8.2446	-7.4465	-5.6599	-4.8281	-3.8138
5445682	70707	0.00376071	-433.663	-404.733	-395.9178	-381.5136	-362.2225	-337.6681	-308.7298	-274.5305	-236.2473	-192.6266	-145.3683	-129.0399	-113.5888	-108.579	-105.4301	-97.3011	-93.9518	-90.0888	-80.7967	-75.1081	-62.0854	-61.4191	-54.6028	-53.0307	-46.9769	-43.5525	-40.5419	-38.2231	-35.4234	-34.741	-32.1369	-30.7657	-27.6576	-25.9435	-24.9233	-23.1216	-20.1324	-17.7331	-15.7165	-13.898	-13.1525	-10.7323	-8.2123	-7.4099	-5.6129	-4.7835	-3.7688
5456527	70777	0.00375884	-433.7035	-404.767	-395.942	-381.5226	-362.2115	-337.6321	-308.6646	-274.4313	-236.1103	-192.4472	-145.1471	-129.0403	-113.5872	-108.5736	-105.4195	-97.273	-93.8366	-89.9302	-80.7625	-75.0628	-62.0403	-61.418	-54.5532	-53.0111	-46.9671	-43.5341	-40.4897	-38.1776	-35.3548	-34.5639	-32.0786	-30.7416	-27.6247	-25.9089	-24.8719	-23.0877	-20.0859	-17.6919	-15.6863	-13.8666	-13.1184	-10.6901	-8.1798	-7.373	-5.5656	-4.7386	-3.7234
5467339	70847	0.00375698	-433.7438	-404.8007	-395.9661	-381.5315	-362.2004	-337.5961	-308.5996	-274.3324	-235.9738	-192.2686	-144.9268	-129.0406	-113.5856	-108.5683	-105.4091	-97.2459	-93.7279	-89.7655	-80.7285	-75.0175	-61.9956	-61.4167	-54.5049	-52.9905	-46.9574	-43.5158	-40.439	-38.1338	-35.3055	-34.3716	-32.0161	-30.7174	-27.5922	-25.8753	-24.8193	-23.0531	-20.0391	-17.6508	-15.6563	-13.8356	-13.0844	-10.6482	-8.1474	-7.3361	-5.5186	-4.6938	-3.6781
5478181	70917	0.00375512	-433.7841	-404.8345	-395.9901	-381.5403	-362.1892	-337.5601	-308.5344	-274.2334	-235.837	-192.0896	-144.7062	-129.0407	-113.584	-108.563	-105.3988	-97.2194	-93.625	-89.5938	-80.6944	-74.972	-61.9511	-61.4151	-54.4576	-52.9689	-46.9477	-43.4975	-40.3893	-38.0912	-35.2675	-34.172	-31.9482	-30.693	-27.5599	-25.8424	-24.765	-23.0177	-19.9916	-17.6096	-15.6263	-13.8046	-13.0502	-10.6061	-8.115	-7.2991	-5.4715	-4.6489	-3.6326
5489107	70988	0.00375325	-433.8246	-404.8684	-396.0143	-381.5491	-362.1779	-337.5237	-308.4686	-274.1335	-235.6992	-191.9093	-144.4842	-129.0408	-113.5823	-108.5577	-105.3884	-97.1934	-93.5271	-89.4147	-80.6599	-74.926	-61.9067	-61.4131	-54.4113	-52.946	-46.9381	-43.4791	-40.3405	-38.0495	-35.2363	-33.9703	-31.8732	-30.6684	-27.5278	-25.8101	-24.709	-22.9812	-19.9431	-17.5681	-15.5961	-13.7736	-13.0157	-10.5639	-8.0824	-7.2617	-5.4242	-4.6036	-3.5868
5500000	71058	0.00375139	-433.8649	-404.9021	-396.0383	-381.5579	-362.1666	-337.4874	-308.4031	-274.0341	-235.5619	-191.7297	-144.2631	-129.0408	-113.5807	-108.5524	-105.3782	-97.1681	-93.4351	-89.2303	-80.6256	-74.8799	-61.863	-61.4106	-54.3663	-52.922	-46.9285	-43.4609	-40.2928	-38.0088	-35.2095	-33.773	-31.7906	-30.6438	-27.496	-25.7787	-24.6519	-22.9439	-19.8942	-17.5267	-15.566	-13.7428	-12.9812	-10.5218	-8.05	-7.2244	-5.3771	-4.5584	-3.541
5519809	71186	0.00374802	-433.9379	-404.9631	-396.0817	-381.5735	-362.1459	-337.4213	-308.284	-273.8533	-235.3124	-191.4034	-143.8619	-129.0405	-113.5778	-108.5429	-105.3598	-97.1234	-93.281	-88.8816	-80.563	-74.7957	-61.7854	-61.4045	-54.2881	-52.8753	-46.9113	-43.4279	-40.2087	-37.9367	-35.1675	-33.4344	-31.6154	-30.5988	-27.4387	-25.7237	-24.5451	-22.8733	-19.8036	-17.4515	-15.5116	-13.6872	-12.9184	-10.4454	-7.9913	-7.1563	-5.2917	-4.4761	-3.4577
5539647	71314	0.00374466	-434.0107	-405.024	-396.1249	-381.589	-362.125	-337.3551	-308.1648	-273.6724	-235.0628	-191.077	-143.461	-129.0398	-113.5749	-108.5334	-105.3416	-97.0801	-93.142	-88.5171	-80.5001	-74.7108	-61.7113	-61.3948	-54.2143	-52.8243	-46.8942	-43.3949	-40.1275	-37.8662	-35.1304	-33.1339	-31.4007	-30.5532	-27.3817	-25.671	-24.4348	-22.7986	-19.7104	-17.3761	-15.4573	-13.6321	-12.8554	-10.3691	-7.9326	-7.0881	-5.2066	-4.3937	-3.3741
5559618	71443	0.00374129	-434.0836	-405.085	-396.1682	-381.6044	-362.1038	-337.2883	-308.0447	-273.4904	-234.8119	-190.7489	-143.0585	-129.0388	-113.572	-108.524	-105.3234	-97.0377	-93.0156	-88.1371	-80.4366	-74.6246	-61.6431	-61.3789	-54.145	-52.7686	-46.8772	-43.362	-40.0484	-37.7966	-35.096	-32.8789	-31.1406	-30.5066	-27.3244	-25.6203	-24.3213	-22.7186	-19.614	-17.3002	-15.4028	-13.577	-12.7919	-10.2926	-7.8738	-7.0192	-5.1212	-4.3107	-3.2898
5579650	71571	0.00373793	-434.1565	-405.1458	-396.2113	-381.6196	-362.0824	-337.2213	-307.9243	-273.308	-234.5604	-190.4202	-142.6559	-129.0372	-113.5691	-108.5146	-105.3054	-96.9963	-92.9004	-87.7451	-80.3726	-74.5375	-61.5853	-61.3527	-54.0804	-52.7081	-46.8604	-43.329	-39.9717	-37.7275	-35.0631	-32.6708	-30.8396	-30.4578	-27.2665	-25.5713	-24.2057	-22.6326	-19.5142	-17.2239	-15.3484	-13.5223	-12.728	-10.216	-7.8149	-6.9499	-5.0358	-4.2274	-3.2051
5599817	71700	0.00373456	-434.2294	-405.2068	-396.2544	-381.6347	-362.0606	-337.1537	-307.8031	-273.1245	-234.3075	-190.0897	-142.2517	-129.0352	-113.5662	-108.5053	-105.2874	-96.9555	-92.7944	-87.3416	-80.3079	-74.4489	-61.5422	-61.3114	-54.0203	-52.6427	-46.8435	-43.296	-39.8969	-37.6586	-35.0312	-32.5024	-30.5199	-30.3926	-27.2073	-25.5239	-24.0887	-22.5392	-19.4105	-17.1468	-15.2937	-13.4677	-12.6637	-10.1392	-7.7557	-6.8801	-4.9502	-4.1435	-3.1196
5620000	71830	0.0037312	-434.3023	-405.2676	-396.2974	-381.6496	-362.0387	-337.0858	-307.6816	-272.9406	-234.0541	-189.7586	-141.8474	-129.0327	-113.5632	-108.4959	-105.2695	-96.9154	-92.6967	-86.9298	-80.2425	-74.3592	-61.5143	-61.2548	-53.9651	-52.5725	-46.8267	-43.263	-39.8241	-37.5898	-35	-32.3648	-30.382	-30.1236	-27.1461	-25.4779	-23.9717	-22.4374	-19.3025	-17.0693	-15.2391	-13.4133	-12.5991	-10.0623	-7.6965	-6.8099	-4.8647	-4.0594	-3.0338
5660747	72089	0.00372447	-434.4479	-405.3892	-396.3831	-381.6788	-361.994	-336.9491	-307.4371	-272.571	-233.545	-189.0938	-141.0378	-129.0257	-113.5573	-108.4774	-105.2338	-96.8366	-92.5208	-86.0862	-80.109	-74.1756	-61.4873	-61.1124	-53.868	-52.4184	-46.7933	-43.1968	-39.6839	-37.4518	-34.9384	-32.1488	-30.2793	-29.3889	-27.0134	-25.3891	-23.742	-22.2038	-19.0717	-16.9118	-15.1297	-13.305	-12.469	-9.9085	-7.5778	-6.6684	-4.6935	-3.8902	-2.8604
5701909	72351	0.00371773	-434.5937	-405.5109	-396.4686	-381.7076	-361.9482	-336.8104	-307.19	-272.1977	-233.0313	-188.4231	-140.2246	-129.0157	-113.5513	-108.4589	-105.1981	-96.7591	-92.3644	-85.222	-79.9705	-73.9849	-61.4768	-60.9523	-53.7868	-52.247	-46.76	-43.1301	-39.55	-37.3122	-34.8772	-31.9775	-30.1809	-28.6729	-26.8531	-25.3031	-23.5246	-21.9217	-18.8153	-16.7495	-15.0195	-13.197	-12.3374	-9.754	-7.458	-6.5249	-4.5217	-3.7193	-2.6845
5743383	72614	0.003711	-434.7393	-405.6323	-396.5537	-381.7356	-361.9014	-336.6705	-306.9411	-271.8222	-232.5149	-187.7492	-139.4116	-129.0019	-113.5452	-108.4405	-105.1624	-96.6828	-92.2226	-84.3497	-79.8252	-73.7866	-61.4723	-60.7856	-53.7193	-52.0615	-46.7267	-43.0632	-39.4224	-37.1711	-34.8157	-31.8302	-30.0812	-28.0463	-26.6358	-25.2186	-23.3263	-21.5883	-18.5269	-16.5806	-14.9088	-13.0895	-12.2049	-9.5995	-7.3374	-6.3801	-4.3497	-3.5475	-2.5064
5764231	72745	0.00370764	-434.812	-405.6928	-396.596	-381.7493	-361.8777	-336.6	-306.816	-271.6337	-232.2557	-187.4111	-139.0055	-128.9934	-113.5421	-108.4314	-105.1445	-96.645	-92.156	-83.9136	-79.7489	-73.6841	-61.4711	-60.701	-53.6898	-51.9643	-46.7101	-43.0296	-39.3608	-37.0999	-34.7848	-31.7621	-30.0308	-27.7871	-26.4922	-25.1763	-23.2351	-21.4036	-18.3682	-16.4924	-14.8533	-13.0359	-12.1384	-9.5222	-7.2769	-6.3072	-4.2637	-3.4612	-2.4166
5785174	72877	0.00370428	-434.8847	-405.7534	-396.6383	-381.7629	-361.8536	-336.5291	-306.6904	-271.4444	-231.9956	-187.0719	-138.5997	-128.9835	-113.539	-108.4222	-105.1266	-96.6073	-92.0917	-83.479	-79.6693	-73.579	-61.4704	-60.6158	-53.6627	-51.8644	-46.6935	-42.9959	-39.3006	-37.0283	-34.7537	-31.6966	-29.9799	-27.5715	-26.32	-25.1334	-23.1488	-21.2085	-18.1982	-16.4005	-14.7976	-12.9823	-12.0716	-9.4449	-7.2161	-6.2339	-4.1776	-3.3747	-2.3262
5806230	73010	0.00370092	-434.9574	-405.8139	-396.6805	-381.7764	-361.8293	-336.4578	-306.5641	-271.2543	-231.7344	-186.7314	-138.1937	-128.9722	-113.5359	-108.4131	-105.1086	-96.5697	-92.0292	-83.0471	-79.5853	-73.4709	-61.47	-60.5299	-53.6378	-51.7621	-46.6768	-42.962	-39.2415	-36.9562	-34.7223	-31.6332	-29.9283	-27.3985	-26.1214	-25.0892	-23.0671	-21.005	-18.016	-16.3037	-14.7415	-12.9288	-12.0045	-9.3675	-7.1549	-6.1602	-4.0913	-3.2878	-2.2352
5870000	73409	0.00369083	-435.1754	-405.9954	-396.8067	-381.8157	-361.7548	-336.2416	-306.1823	-270.68	-230.9459	-185.7036	-136.9808	-128.9267	-113.5261	-108.3857	-105.0542	-96.4577	-91.8511	-81.7936	-79.2903	-73.1256	-61.4701	-60.2697	-53.5734	-51.4434	-46.6267	-42.8596	-39.0715	-36.7378	-34.6263	-31.4521	-29.7705	-27.0624	-25.4653	-24.9313	-22.845	-20.3724	-17.3995	-15.9608	-14.5716	-12.7682	-11.8018	-9.135	-6.9697	-5.9369	-3.8319	-3.0257	-1.9585
5902137	73610	0.00368579	-435.2844	-406.086	-396.8695	-381.8348	-361.7167	-336.1321	-305.9894	-270.3903	-230.5483	-185.1858	-136.3784	-128.8957	-113.5211	-108.372	-105.0267	-96.4019	-91.7661	-81.2133	-79.0994	-72.9381	-61.4706	-60.1383	-53.5459	-51.2784	-46.6015	-42.8078	-38.9902	-36.6276	-34.5769	-31.3652	-29.6896	-26.9508	-25.1868	-24.7995	-22.7437	-20.0601	-17.0677	-15.7332	-14.485	-12.6879	-11.6995	-9.0185	-6.8758	-5.8238	-3.7017	-2.8938	-1.8181
5934524	73812	0.00368075	-435.3933	-406.1765	-396.9321	-381.8535	-361.6779	-336.0218	-305.7955	-270.0993	-230.1491	-184.666	-135.7812	-128.8573	-113.5159	-108.3584	-104.9991	-96.3463	-91.6832	-80.6919	-78.856	-72.7382	-61.4712	-60.0062	-53.5208	-51.1105	-46.5762	-42.7557	-38.9112	-36.517	-34.5266	-31.2801	-29.6075	-26.8571	-25.0111	-24.5804	-22.647	-19.7606	-16.7494	-15.437	-14.3967	-12.6074	-11.5965	-8.9021	-6.7811	-5.71	-3.5714	-2.7615	-1.6765
5967146	74015	0.00367571	-435.5023	-406.267	-396.9945	-381.8719	-361.6385	-335.9106	-305.6002	-269.8065	-229.7477	-184.1434	-135.1905	-128.8095	-113.5106	-108.3447	-104.9712	-96.2906	-91.6019	-80.2543	-78.5374	-72.5232	-61.472	-59.8733	-53.4977	-50.9399	-46.5508	-42.7032	-38.8342	-36.4062	-34.4751	-31.1964	-29.5239	-26.7741	-24.9092	-24.3066	-22.5533	-19.477	-16.4703	-15.0494	-14.3044	-12.5268	-11.4925	-8.7855	-6.6854	-5.5951	-3.4406	-2.6286	-1.5335
6000000	74218	0.00367067	-435.6112	-406.3575	-397.0567	-381.8898	-361.5985	-335.7984	-305.4037	-269.5119	-229.3441	-183.6183	-134.6092	-128.7496	-113.5051	-108.3311	-104.943	-96.235	-91.5219	-79.9133	-78.1343	-72.2898	-61.4729	-59.7396	-53.4763	-50.767	-46.5252	-42.6502	-38.7591	-36.2954	-34.4223	-31.1139	-29.4389	-26.6981	-24.8336	-24.0262	-22.4615	-19.2102	-16.2401	-14.5777	-14.1957	-12.4458	-11.3872	-8.6689	-6.5886	-5.4792	-3.3096
6029631	74401	0.00366615	-435.7088	-406.4385	-397.1123	-381.9056	-361.5621	-335.6971	-305.2265	-269.2466	-228.9807	-183.1455	-134.0994	-128.6826	-113.5	-108.3188	-104.9175	-96.1852	-91.4512	-79.6798	-77.715	-72.0618	-61.4738	-59.6192	-53.4583	-50.6103	-46.5022	-42.6023	-38.6932	-36.1963	-34.3738	-31.0408	-29.3615	-26.634	-24.7742	-23.7832	-22.38	-18.9842	-16.0687	-14.2251	-13.9556	-12.3728	-11.2911	-8.5643	-6.5009	-5.3745	-3.1918	-2.3751	-1.2586
6059485	74585	0.00366163	-435.8065	-406.5195	-397.1678	-381.9211	-361.5252	-335.5949	-305.048	-268.9796	-228.6152	-182.6701	-133.6028	-128.5994	-113.4948	-108.3066	-104.8917	-96.1353	-91.3811	-79.4946	-77.2634	-71.8125	-61.4747	-59.498	-53.4413	-50.4519	-46.4789	-42.5539	-38.6287	-36.0974	-34.3239	-30.9684	-29.2829	-26.5726	-24.7181	-23.5511	-22.2981	-18.7686	-15.9199	-14.0985	-13.4366	-12.2988	-11.1923	-8.4595	-6.4119	-5.2686	-3.0736	-2.2543	-1.127
6119709	74955	0.00365258	-436.0017	-406.6813	-397.2783	-381.9512	-361.4498	-335.3884	-304.6883	-268.4419	-227.8794	-181.7137	-132.6713	-128.3659	-113.4839	-108.282	-104.8394	-96.0355	-91.2427	-79.2081	-76.3426	-71.2363	-61.4765	-59.2538	-53.4096	-50.1314	-46.4318	-42.456	-38.5031	-35.9019	-34.2199	-30.8253	-29.1221	-26.4556	-24.6106	-23.1243	-22.13	-18.3619	-15.6631	-13.9234	-12.27	-12.1039	-10.9726	-8.2498	-6.2303	-5.0535	-2.8364	-2.0113	-0.8607
6180683	75327	0.00364354	-436.1968	-406.8429	-397.3882	-381.9799	-361.3724	-335.1788	-304.3244	-267.8988	-227.1368	-180.749	-131.8623	-128.0018	-113.4721	-108.2573	-104.7859	-95.9355	-91.1058	-78.9768	-75.4789	-70.533	-61.4782	-59.0069	-53.3804	-49.8061	-46.384	-42.356	-38.3817	-35.7103	-34.1094	-30.684	-28.9565	-26.3435	-24.5053	-22.7493	-21.9482	-17.9763	-15.4355	-13.755	-12.0192	-11.1177	-10.5156	-8.0399	-6.0415	-4.8322	-2.5977	-1.7655	-0.5904
6242419	75703	0.0036345	-436.3919	-407.0043	-397.4974	-382.0075	-361.2929	-334.9663	-303.9563	-267.3502	-226.3873	-179.7759	-131.2253	-127.4576	-113.4592	-108.2326	-104.7311	-95.8352	-90.9698	-78.7703	-74.7219	-69.6844	-61.4797	-58.757	-53.3532	-49.4767	-46.335	-42.254	-38.2637	-35.5242	-33.9914	-30.5443	-28.786	-26.2345	-24.4001	-22.4305	-21.7409	-17.6015	-15.2232	-13.5843	-11.8698	-10.7444	-9.2873	-7.8291	-5.841	-4.601	-2.3574	-1.5154	-0.316
6305600	76085	0.00362536	-436.5889	-407.1672	-397.6072	-382.034	-361.2105	-334.7483	-303.58	-266.7901	-225.6227	-178.7837	-130.7722	-126.7091	-113.445	-108.2074	-104.6743	-95.7335	-90.8327	-78.5743	-74.0763	-68.682	-61.4808	-58.5008	-53.3271	-49.1402	-46.2843	-42.1484	-38.1473	-35.3432	-33.8635	-30.4042	-28.6087	-26.1264	-24.293	-22.1679	-21.4975	-17.2267	-15.0179	-13.4078	-11.72	-10.5281	-7.8855	-7.6083	-5.6122	-4.3475	-2.1125	-1.2557	-0.0344
6369582	76470	0.00361622	-436.7859	-407.3298	-397.7163	-382.0592	-361.1259	-334.5272	-303.1993	-266.2242	-224.8509	-177.7829	-130.4772	-125.7951	-113.429	-108.182	-104.6158	-95.6313	-90.6956	-78.3854	-73.536	-67.5569	-61.4812	-58.2402	-53.3022	-48.8004	-46.2318	-42.04	-38.0333	-35.1706	-33.7263	-30.265	-28.4265	-26.0197	-24.1844	-21.956	-21.2246	-16.8514	-14.819	-13.2263	-11.5698	-10.3305	-7.4093	-6.5536	-5.2972	-4.0422	-1.8647	-0.9837
6434378	76858	0.00360708	-436.9828	-407.4923	-397.8247	-382.0831	-361.0391	-334.3028	-302.8142	-265.6526	-224.0718	-176.7733	-130.2889	-124.7676	-113.4109	-108.1564	-104.5555	-95.5287	-90.5581	-78.2004	-73.0761	-66.3396	-61.4801	-57.9741	-53.2781	-48.4578	-46.1773	-41.9284	-37.9211	-35.0073	-33.5792	-30.1265	-28.2395	-25.9137	-24.0738	-21.7775	-20.936	-16.4728	-14.625	-13.0391	-11.4187	-10.1379	-7.1948	-5.6932	-4.7085	-3.5538	-1.6126	-0.6862
6500000	77249	0.00359795	-437.1797	-407.6544	-397.9324	-382.1056	-360.9501	-334.0752	-302.4246	-265.0752	-223.2853	-175.7548	-130.1669	-123.6681	-113.3898	-108.1305	-104.4931	-95.4256	-90.42	-78.0178	-72.6732	-65.0596	-61.476	-57.7006	-53.2546	-48.1129	-46.1199	-41.8133	-37.8102	-34.8536	-33.4223	-29.9885	-28.0478	-25.8082	-23.9606	-21.6183	-20.6433	-16.0894	-14.4349	-12.8455	-11.2666	-9.9473	-6.9812	-5.3169	-4.1297	-2.635	-1.351	-0.3275
6560000	77604	0.00358971	-437.357	-407.8004	-398.0289	-382.1248	-360.868	-333.8672	-302.0697	-264.5497	-222.5702	-174.8293	-130.0925	-122.6377	-113.3674	-108.1068	-104.4348	-95.3323	-90.2947	-77.8545	-72.3443	-63.8754	-61.4655	-57.4452	-53.234	-47.8009	-46.0647	-41.706	-37.7112	-34.7231	-33.273	-29.8643	-27.8713	-25.7134	-23.856	-21.484	-20.3812	-15.7395	-14.2665	-12.6649	-11.1285	-9.7762	-6.7886	-5.0876	-3.8082	-1.6893	-1.088
6620412	77961	0.00358147	-437.5343	-407.9462	-398.1249	-382.1428	-360.7841	-333.6566	-301.7111	-264.0194	-221.849	-173.8964	-130.0402	-121.5833	-113.3405	-108.0827	-104.3743	-95.2384	-90.1686	-77.6917	-72.0381	-62.6971	-61.4293	-57.1773	-53.2136	-47.4889	-46.0047	-41.5949	-37.6127	-34.5999	-33.1167	-29.7401	-27.6913	-25.6186	-23.7487	-21.355	-20.1231	-15.3854	-14.1002	-12.4781	-10.9893	-9.6054	-6.5956	-4.8831	-3.5549	-1.0772	-0.7281
6650947	78140	0.00357735	-437.6229	-408.019	-398.1726	-382.1514	-360.7414	-333.5502	-301.5304	-263.7524	-221.4861	-173.4272	-130.02	-121.0501	-113.3247	-108.0706	-104.3431	-95.1913	-90.1051	-77.6105	-71.8915	-62.1519	-61.3646	-57.0364	-53.2035	-47.3335	-45.9722	-41.5378	-37.5635	-34.5408	-33.0362	-29.678	-27.6001	-25.5711	-23.6939	-21.2917	-19.9958	-15.207	-14.0177	-12.3821	-10.9193	-9.52	-6.499	-4.7844	-3.4383	-0.9073	-0.5266
6658603	78185	0.00357633	-437.645	-408.0372	-398.1845	-382.1535	-360.7307	-333.5236	-301.4851	-263.6856	-221.3952	-173.3097	-130.0155	-120.9164	-113.3205	-108.0675	-104.3352	-95.1795	-90.0892	-77.5902	-71.8554	-62.0323	-61.332	-57.0003	-53.201	-47.2948	-45.9637	-41.5233	-37.5512	-34.5263	-33.0159	-29.6625	-27.5772	-25.5593	-23.6801	-21.276	-19.9642	-15.1624	-13.9972	-12.3578	-10.9018	-9.4987	-6.4749	-4.7599	-3.4097	-0.8708	-0.4791
6666270	78230	0.0035753	-437.6671	-408.0554	-398.1964	-382.1556	-360.7199	-333.4969	-301.4397	-263.6186	-221.3042	-173.1921	-130.0112	-120.7826	-113.3161	-108.0644	-104.3273	-95.1677	-90.0733	-77.5699	-71.8195	-61.9252	-61.2868	-56.9637	-53.1985	-47.2562	-45.9551	-41.5088	-37.5389	-34.5119	-32.9954	-29.647	-27.5543	-25.5474	-23.6662	-21.2603	-19.9327	-15.1177	-13.9766	-12.3335	-10.8842	-9.4774	-6.4507	-4.7355	-3.3814	-0.8357	-0.4331
6673948	78275	0.00357427	-437.6893	-408.0736	-398.2083	-382.1576	-360.7092	-333.4701	-301.3943	-263.5516	-221.2131	-173.0744	-130.007	-120.6486	-113.3116	-108.0614	-104.3193	-95.1559	-90.0574	-77.5496	-71.7838	-61.8348	-61.2252	-56.9267	-53.196	-47.2176	-45.9463	-41.4941	-37.5267	-34.4976	-32.9749	-29.6315	-27.5313	-25.5356	-23.6523	-21.2447	-19.9013	-15.0729	-13.9561	-12.309	-10.8666	-9.4561	-6.4266	-4.7112	-3.3532	-0.8017	-0.3885
6681664	78321	0.00357324	-437.7115	-408.0918	-398.2202	-382.1597	-360.6983	-333.4432	-301.3487	-263.4842	-221.1216	-172.9561	-130.003	-120.5141	-113.307	-108.0583	-104.3113	-95.144	-90.0414	-77.5292	-71.7482	-61.7629	-61.1448	-56.889	-53.1934	-47.179	-45.9373	-41.4794	-37.5143	-34.4833	-32.9543	-29.6159	-27.5082	-25.5237	-23.6383	-21.229	-19.8698	-15.0279	-13.9356	-12.2843	-10.849	-9.4347	-6.4023	-4.6868	-3.3251	-0.7684	-0.3451
6689346	78366	0.00357221	-437.7336	-408.1099	-398.2321	-382.1617	-360.6875	-333.4164	-301.3033	-263.4172	-221.0305	-172.8384	-129.9992	-120.3803	-113.3022	-108.0552	-104.3032	-95.1322	-90.0255	-77.509	-71.713	-61.7095	-61.047	-56.8511	-53.1909	-47.1408	-45.9281	-41.4647	-37.5021	-34.4692	-32.9337	-29.6004	-27.4852	-25.5118	-23.6243	-21.2135	-19.8386	-14.9832	-13.9151	-12.2596	-10.8314	-9.4134	-6.3782	-4.6625	-3.2973	-0.736	-0.3033
6697067	78411	0.00357118	-437.7557	-408.1281	-398.244	-382.1637	-360.6766	-333.3895	-301.2577	-263.3498	-220.939	-172.7202	-129.9956	-120.2458	-113.2973	-108.0521	-104.2951	-95.1204	-90.0094	-77.4887	-71.6778	-61.6706	-60.9345	-56.8124	-53.1884	-47.1025	-45.9187	-41.4498	-37.4898	-34.4551	-32.9129	-29.5848	-27.462	-25.4999	-23.6102	-21.1979	-19.8073	-14.9383	-13.8946	-12.2348	-10.8137	-9.392	-6.354	-4.6382	-3.2695	-0.704	-0.2625
6712542	78501	0.00356912	-437.8	-408.1645	-398.2677	-382.1677	-360.6547	-333.3356	-301.1662	-263.2149	-220.7558	-172.4834	-129.9887	-119.9768	-113.2868	-108.0458	-104.2787	-95.0967	-89.9774	-77.4481	-71.6079	-61.622	-60.6814	-56.7332	-53.1834	-47.0262	-45.8993	-41.4198	-37.4652	-34.4272	-32.8711	-29.5537	-27.4156	-25.4762	-23.5818	-21.1668	-19.7451	-14.8484	-13.8536	-12.1847	-10.7784	-9.3493	-6.3055	-4.5897	-3.2143	-0.6412	-0.1842
6743626	78683	0.003565	-437.8886	-408.2372	-398.3151	-382.1755	-360.6107	-333.2271	-300.9826	-262.9441	-220.388	-172.0084	-129.9766	-119.4386	-113.2636	-108.0332	-104.2452	-95.0491	-89.913	-77.3668	-71.47	-61.5784	-60.1281	-56.5654	-53.1734	-46.8758	-45.8571	-41.3587	-37.4159	-34.3724	-32.7868	-29.4914	-27.3223	-25.4286	-23.5243	-21.1049	-19.6216	-14.6684	-13.7717	-12.083	-10.7073	-9.2638	-6.2085	-4.4929	-3.1048	-0.5188	-0.0381
6806604	79050	0.00355672	-438.0665	-408.3831	-398.4097	-382.1901	-360.5207	-333.0072	-300.6109	-262.3965	-219.6448	-171.0487	-129.9579	-118.3614	-113.2038	-108.0073	-104.1752	-94.9532	-89.7827	-77.2035	-71.1989	-61.5505	-59.0053	-56.1717	-53.1534	-46.5871	-45.7536	-41.2314	-37.3166	-34.2658	-32.6142	-29.366	-27.133	-25.3328	-23.4059	-20.9811	-19.3771	-14.3076	-13.6062	-11.8725	-10.5635	-9.0919	-6.0133	-4.2984	-2.8878	-0.2791
6870318	79419	0.00354845	-438.2443	-408.5287	-398.5038	-382.2036	-360.4289	-332.7845	-300.2354	-261.8438	-218.8951	-170.0814	-129.945	-117.3026	-113.1159	-107.9804	-104.1009	-94.8567	-89.6508	-77.0399	-70.934	-61.5416	-57.9922	-55.6424	-53.1334	-46.3321	-45.6078	-41.0967	-37.2165	-34.1634	-32.4383	-29.2401	-26.9416	-25.2367	-23.283	-20.8578	-19.1374	-13.9521	-13.436	-11.6528	-10.418	-8.9198	-5.8174	-4.103	-2.6726	-0.0419
6934780	79790	0.00354018	-438.4221	-408.6742	-398.5973	-382.2159	-360.3351	-332.5589	-299.856	-261.286	-218.1391	-169.1064	-129.9365	-116.2903	-112.9749	-107.952	-104.021	-94.7595	-89.5173	-76.8758	-70.6733	-61.5381	-57.1959	-54.89	-53.1133	-46.1312	-45.3974	-40.953	-37.1153	-34.0641	-32.2599	-29.1136	-26.7487	-25.1403	-23.1553	-20.7344	-18.902	-13.6139	-13.2504	-11.4229	-10.2705	-8.7471	-5.6207	-3.906	-2.458
7000000	80165	0.0035319	-438.5998	-408.8194	-398.6901	-382.2271	-360.2393	-332.3305	-299.4727	-260.7231	-217.3765	-168.1237	-129.9315	-115.3809	-112.7274	-107.9217	-103.934	-94.6617	-89.382	-76.7113	-70.4156	-61.5368	-56.632	-53.9094	-53.0926	-45.9856	-45.1184	-40.7983	-37.0124	-33.9674	-32.0795	-28.9863	-26.5547	-25.0434	-23.0222	-20.6108	-18.6704	-13.3234	-13.0209	-11.1819	-10.1203	-8.5739	-5.4233	-3.7072	-2.2432
7029689	80335	0.00352816	-438.68	-408.8849	-398.7318	-382.2317	-360.1955	-332.2264	-299.2983	-260.4673	-217.0302	-167.6776	-129.9302	-115.0291	-112.5569	-107.9071	-103.8918	-94.6173	-89.3203	-76.6369	-70.3	-61.5366	-56.4316	-53.4182	-53.0814	-45.9331	-44.974	-40.7241	-36.9653	-33.9244	-31.9976	-28.9286	-26.4669	-24.9995	-22.9602	-20.5548	-18.567	-13.2164	-12.8949	-11.0692	-10.0515	-8.4955	-5.3339	-3.6168	-2.1461
7037136	80377	0.00352723	-438.7	-408.9013	-398.7423	-382.2328	-360.1844	-332.2003	-299.2546	-260.4031	-216.9434	-167.5659	-129.9299	-114.9486	-112.5069	-107.9033	-103.881	-94.6061	-89.3048	-76.6183	-70.2711	-61.5366	-56.3851	-53.2938	-53.077	-45.9208	-44.9364	-40.7051	-36.9534	-33.9138	-31.9771	-28.9141	-26.4449	-24.9885	-22.9445	-20.5407	-18.5413	-13.1918	-12.8614	-11.0407	-10.0342	-8.4759	-5.3116	-3.5941	-2.1218
7040863	80398	0.00352676	-438.71	-408.9095	-398.7475	-382.2334	-360.1789	-332.1872	-299.2327	-260.3711	-216.9	-167.5099	-129.9298	-114.9096	-112.4807	-107.9014	-103.8755	-94.6006	-89.2971	-76.609	-70.2567	-61.5366	-56.3624	-53.2325	-53.0736	-45.9148	-44.9174	-40.6955	-36.9474	-33.9084	-31.9669	-28.9069	-26.4339	-24.983	-22.9366	-20.5337	-18.5284	-13.1799	-12.8444	-11.0263	-10.0255	-8.4661	-5.3004	-3.5828	-2.1096
7044592	80420	0.0035263	-438.72	-408.9177	-398.7527	-382.2339	-360.1734	-332.1742	-299.2108	-260.339	-216.8566	-167.454	-129.9297	-114.8715	-112.4536	-107.8994	-103.87	-94.595	-89.2893	-76.5996	-70.2423	-61.5366	-56.3399	-53.1736	-53.0675	-45.9089	-44.8982	-40.6858	-36.9415	-33.9031	-31.9566	-28.8996	-26.423	-24.9775	-22.9287	-20.5267	-18.5156	-13.1681	-12.8272	-11.0119	-10.0168	-8.4562	-5.2892	-3.5714	-2.0975
7048324	80441	0.00352583	-438.7301	-408.9259	-398.7579	-382.2345	-360.1678	-332.1611	-299.1889	-260.3069	-216.8131	-167.398	-129.9296	-114.8341	-112.4258	-107.8975	-103.8644	-94.5894	-89.2815	-76.5903	-70.2279	-61.5366	-56.3178	-53.1238	-53.0522	-45.9031	-44.8789	-40.6761	-36.9355	-33.8977	-31.9463	-28.8924	-26.412	-24.972	-22.9208	-20.5197	-18.5028	-13.1564	-12.8099	-10.9975	-10.0081	-8.4464	-5.278	-3.5601	-2.0853
7052058	80462	0.00352536	-438.7401	-408.934	-398.7631	-382.235	-360.1623	-332.148	-299.167	-260.2747	-216.7696	-167.342	-129.9295	-114.7977	-112.3971	-107.8956	-103.8588	-94.5838	-89.2738	-76.581	-70.2135	-61.5366	-56.2959	-53.097	-53.0136	-45.8973	-44.8595	-40.6663	-36.9295	-33.8924	-31.9361	-28.8852	-26.401	-24.9665	-22.9129	-20.5127	-18.4899	-13.145	-12.7924	-10.9831	-9.9994	-8.4366	-5.2668	-3.5487	-2.0732
7055795	80484	0.0035249	-438.7501	-408.9422	-398.7682	-382.2355	-360.1567	-332.1349	-299.1451	-260.2426	-216.7261	-167.286	-129.9294	-114.762	-112.3675	-107.8936	-103.8532	-94.5783	-89.266	-76.5717	-70.1991	-61.5366	-56.2743	-53.0872	-52.9577	-45.8916	-44.8399	-40.6565	-36.9235	-33.8871	-31.9258	-28.8779	-26.39	-24.961	-22.9049	-20.5057	-18.4771	-13.1337	-12.7748	-10.9686	-9.9906	-8.4268	-5.2556	-3.5373	-2.061
7059574	80505	0.00352443	-438.7602	-408.9505	-398.7735	-382.2361	-360.1511	-332.1216	-299.1229	-260.2101	-216.6821	-167.2294	-129.9293	-114.7269	-112.3368	-107.8916	-103.8475	-94.5726	-89.2581	-76.5623	-70.1845	-61.5366	-56.2527	-53.0827	-52.8958	-45.8858	-44.82	-40.6466	-36.9175	-33.8817	-31.9154	-28.8706	-26.3789	-24.9555	-22.8968	-20.4986	-18.4642	-13.1224	-12.7569	-10.9539	-9.9818	-8.4168	-5.2442	-3.5258	-2.0487
7067031	80548	0.00352349	-438.7802	-408.9668	-398.7838	-382.2371	-360.14	-332.0955	-299.0792	-260.1459	-216.5953	-167.1176	-129.9291	-114.6603	-112.2737	-107.8876	-103.8361	-94.5615	-89.2426	-76.5437	-70.1559	-61.5367	-56.2109	-53.0777	-52.7692	-45.8747	-44.7804	-40.6267	-36.9055	-33.8712	-31.8949	-28.8561	-26.3571	-24.9445	-22.8809	-20.4846	-18.4387	-13.1006	-12.7213	-10.9248	-9.9643	-8.3972	-5.2219	-3.5031	-2.0245
7074537	80590	0.00352256	-438.8003	-408.9831	-398.7942	-382.2382	-360.1289	-332.0691	-299.0352	-260.0814	-216.508	-167.0052	-129.929	-114.5968	-112.2069	-107.8835	-103.8244	-94.5503	-89.2269	-76.525	-70.1271	-61.5367	-56.1698	-53.0743	-52.6399	-45.8638	-44.7401	-40.6066	-36.8934	-33.8605	-31.8743	-28.8416	-26.3351	-24.9335	-22.8648	-20.4705	-18.4132	-13.0791	-12.685	-10.8954	-9.9467	-8.3775	-5.1994	-3.4803	-2.0001
7089580	80676	0.00352069	-438.8404	-409.0159	-398.815	-382.2402	-360.1065	-332.0164	-298.947	-259.9521	-216.3331	-166.7801	-129.9289	-114.4802	-112.0631	-107.8751	-103.8007	-94.5279	-89.1955	-76.4876	-70.0695	-61.5367	-56.0899	-53.0687	-52.3784	-45.8425	-44.658	-40.5655	-36.8691	-33.8393	-31.8331	-28.8125	-26.2911	-24.9114	-22.8323	-20.4423	-18.3621	-13.0375	-12.6116	-10.8361	-9.9113	-8.3381	-5.1545	-3.4345	-1.9513
7120000	80848	0.00351695	-438.9206	-409.0813	-398.8564	-382.2441	-360.0613	-331.9104	-298.77	-259.6928	-215.9823	-166.3286	-129.9288	-114.2865	-111.7379	-107.8573	-103.7509	-94.4829	-89.1324	-76.4127	-69.9545	-61.537	-55.9383	-53.0588	-51.8509	-45.8018	-44.488	-40.4802	-36.82	-33.7971	-31.7505	-28.7541	-26.2032	-24.8672	-22.7663	-20.3857	-18.2605	-12.9583	-12.4621	-10.7157	-9.8395	-8.259	-5.0644	-3.3426	-1.8535
7180637	81192	0.00350948	-439.0809	-409.212	-398.9387	-382.2511	-359.9699	-331.6967	-298.4137	-259.1712	-215.2771	-165.4215	-129.9298	-114.0254	-110.9723	-107.8154	-103.6406	-94.3926	-89.0047	-76.2625	-69.7249	-61.5376	-55.6583	-53.0401	-50.7975	-45.7249	-44.1259	-40.2947	-36.7191	-33.7133	-31.5849	-28.6367	-26.028	-24.7785	-22.63	-20.2721	-18.059	-12.8094	-12.1597	-10.4677	-9.6918	-8.1002	-4.8836	-3.1575	-1.6575
7242142	81539	0.003502	-439.2412	-409.3425	-399.0205	-382.2571	-359.8768	-331.4807	-298.0541	-258.6453	-214.5664	-164.5079	-129.9319	-113.8711	-110.1266	-107.7581	-103.5109	-94.3014	-88.8748	-76.1118	-69.4955	-61.5384	-55.3974	-53.0216	-49.7701	-45.6494	-43.7334	-40.0838	-36.6133	-33.6299	-31.4187	-28.5184	-25.8536	-24.6893	-22.4877	-20.1575	-17.8595	-12.6673	-11.8595	-10.2122	-9.5356	-7.9403	-4.702	-2.9704	-1.4605
7305554	81896	0.00349438	-439.4046	-409.4754	-399.1035	-382.2622	-359.7801	-331.2577	-297.6838	-258.1043	-213.8358	-163.5694	-129.935	-113.7718	-109.2674	-107.6592	-103.3496	-94.2075	-88.7399	-75.9575	-69.2613	-61.5393	-55.143	-53.0025	-48.777	-45.569	-43.2996	-39.8327	-36.4983	-33.5449	-31.2487	-28.3966	-25.6773	-24.5979	-22.336	-20.0396	-17.6577	-12.5257	-11.56	-9.949	-9.3616	-7.7757	-4.5157	-2.7774	-1.2584
7337510	82075	0.00349057	-439.4862	-409.5418	-399.1447	-382.2643	-359.7311	-331.1453	-297.4974	-257.8322	-213.4685	-163.0977	-129.9369	-113.7351	-108.8747	-107.5726	-103.2536	-94.1602	-88.6714	-75.88	-69.144	-61.5398	-55.0188	-52.993	-48.3103	-45.5256	-43.0702	-39.6894	-36.4371	-33.5023	-31.1634	-28.3353	-25.5898	-24.552	-22.2574	-19.9802	-17.5573	-12.4557	-11.4135	-9.8195	-9.2661	-7.6927	-4.4222	-2.6802	-1.157
7369661	82254	0.00348675	-439.5679	-409.6082	-399.1859	-382.2661	-359.6817	-331.0322	-297.31	-257.5588	-213.0995	-162.6241	-129.939	-113.7042	-108.5396	-107.434	-103.144	-94.1127	-88.6021	-75.8024	-69.0266	-61.5403	-54.896	-52.9834	-47.868	-45.4786	-42.833	-39.5314	-36.3724	-33.4597	-31.0778	-28.2736	-25.5028	-24.506	-22.177	-19.9205	-17.4573	-12.386	-11.2691	-9.6936	-9.1628	-7.6091	-4.3284	-2.5823	-1.0553
7401976	82434	0.00348294	-439.6495	-409.6744	-399.2269	-382.2677	-359.6318	-330.9185	-297.1218	-257.2843	-212.7292	-162.1489	-129.9412	-113.6778	-108.2914	-107.2193	-103.0176	-94.0648	-88.5321	-75.7246	-68.9089	-61.5408	-54.7744	-52.9737	-47.4547	-45.4264	-42.5897	-39.3562	-36.3035	-33.417	-30.9919	-28.2117	-25.4164	-24.4598	-22.0948	-19.8604	-17.3576	-12.3166	-11.127	-9.5731	-9.05	-7.5249	-4.2343	-2.4839	-0.9532
7434473	82615	0.00347913	-439.7312	-409.7407	-399.2677	-382.269	-359.5815	-330.8042	-296.9327	-257.0086	-212.3573	-161.672	-129.9435	-113.6548	-108.1322	-106.9312	-102.8704	-94.0166	-88.4612	-75.6466	-68.7911	-61.5413	-54.6537	-52.9639	-47.0742	-45.3665	-42.3425	-39.1616	-36.2291	-33.3741	-30.9056	-28.1494	-25.3306	-24.4135	-22.0106	-19.7999	-17.2582	-12.2474	-10.9872	-9.4593	-8.9267	-7.4398	-4.1399	-2.3849	-0.8508
7500000	82978	0.0034715	-439.8944	-409.873	-399.349	-382.2709	-359.4795	-330.5735	-296.5518	-256.4537	-211.6093	-160.7131	-129.9485	-113.6166	-107.971	-106.2667	-102.4948	-93.9192	-88.3167	-75.4901	-68.5547	-61.5422	-54.4145	-52.9442	-46.4316	-45.2079	-41.8492	-38.7067	-36.0557	-33.2877	-30.7315	-28.0239	-25.1611	-24.3206	-21.8364	-19.6778	-17.0601	-12.1094	-10.7141	-9.2532	-8.6486	-7.2667	-3.9501	-2.1853	-0.6451
7559715	83308	0.00346463	-440.0415	-409.9922	-399.4219	-382.2716	-359.386	-330.3631	-296.2052	-255.9492	-210.9296	-159.8424	-129.9534	-113.5885	-107.898	-105.7024	-102.0379	-93.83	-88.1828	-75.3483	-68.3404	-61.5431	-54.2008	-52.926	-46.0137	-44.993	-41.4252	-38.2235	-35.8527	-33.2089	-30.5718	-27.9095	-25.0108	-24.2363	-21.6723	-19.5663	-16.8821	-11.9851	-10.4744	-9.0873	-8.3682	-7.106	-3.7779	-2.0032	-0.4584
7620000	83640	0.00345775	-440.1886	-410.1113	-399.4942	-382.2713	-359.291	-330.1506	-295.8556	-255.4409	-210.245	-158.9661	-129.9585	-113.5645	-107.8491	-105.2345	-101.4529	-93.7391	-88.0449	-75.2058	-68.1251	-61.5438	-53.9885	-52.9073	-45.7484	-44.7029	-41.0377	-37.7024	-35.5678	-33.129	-30.4081	-27.7939	-24.8631	-24.1515	-21.5016	-19.4531	-16.7046	-11.8607	-10.2402	-8.9337	-8.0698	-6.9388	-3.6046	-1.8192	-0.2706
7680939	83973	0.00345088	-440.3356	-410.2301	-399.5661	-382.2702	-359.1946	-329.936	-295.503	-254.9286	-209.5555	-158.0842	-129.9637	-113.5435	-107.8109	-104.871	-100.7475	-93.6461	-87.9025	-75.0627	-67.9086	-61.5445	-53.7776	-52.888	-45.5844	-44.3773	-40.6915	-37.2105	-35.144	-33.0476	-30.2378	-27.677	-24.7181	-24.0663	-21.3241	-19.3381	-16.5275	-11.7361	-10.0105	-8.7873	-7.7628	-6.7619	-3.4301	-1.6331	-0.0817
7742462	84309	0.003444	-440.4825	-410.3488	-399.6376	-382.2682	-359.0966	-329.7191	-295.1475	-254.4125	-208.8611	-157.1967	-129.9689	-113.5247	-107.7782	-104.5942	-99.9468	-93.5502	-87.7545	-74.9188	-67.6907	-61.5452	-53.5682	-52.8674	-45.4708	-44.055	-40.3819	-36.8158	-34.536	-32.9641	-30.0568	-27.5589	-24.5758	-23.9806	-21.1397	-19.2211	-16.3506	-11.6112	-9.7843	-8.6451	-7.4566	-6.5699	-3.2544	-1.4448
7784689	84539	0.00343932	-440.5825	-410.4295	-399.6859	-382.2662	-359.0291	-329.5702	-294.9037	-254.0589	-208.3857	-156.5895	-129.9725	-113.5129	-107.7579	-104.4431	-99.3624	-93.4829	-87.6502	-74.8205	-67.5416	-61.5455	-53.4269	-52.8523	-45.4079	-43.8464	-40.1877	-36.6105	-34.0244	-32.9048	-29.9235	-27.4777	-24.4804	-23.922	-21.0103	-19.1402	-16.2303	-11.5259	-9.632	-8.5496	-7.2541	-6.4268	-3.1341	-1.3155
7827114	84769	0.00343465	-440.6822	-410.51	-399.734	-382.2639	-358.961	-329.4206	-294.659	-253.7042	-207.9089	-155.9809	-129.976	-113.5018	-107.7386	-104.3147	-98.7566	-93.4134	-87.5425	-74.722	-67.3922	-61.5459	-53.2878	-52.8354	-45.3518	-43.6485	-40.004	-36.4458	-33.4613	-32.8398	-29.7777	-27.396	-24.3864	-23.8633	-20.8781	-19.0582	-16.1102	-11.4405	-9.4811	-8.4549	-7.0607	-6.2706	-3.0135	-1.1853
7870000	85000	0.00342997	-440.7822	-410.5905	-399.7819	-382.2611	-358.892	-329.2697	-294.4125	-253.3469	-207.4288	-155.3685	-129.9795	-113.4912	-107.7201	-104.2033	-98.1341	-93.3407	-87.4307	-74.623	-67.2417	-61.5461	-53.1521	-52.8148	-45.2998	-43.4607	-39.8277	-36.3094	-32.9232	-32.714	-29.6116	-27.3135	-24.2934	-23.8042	-20.7425	-18.9747	-15.9899	-11.3546	-9.3307	-8.3605	-6.8789	-6.0981	-2.892	-1.0538
7913020	85233	0.00342529	-440.8821	-410.671	-399.8296	-382.2579	-358.8223	-329.1177	-294.1644	-252.9877	-206.9463	-154.7534	-129.9829	-113.481	-107.7021	-104.1051	-97.502	-93.2637	-87.3141	-74.5236	-67.0904	-61.5464	-53.0252	-52.7853	-45.2506	-43.2827	-39.6572	-36.1923	-32.7602	-32.2041	-29.4134	-27.2302	-24.2012	-23.7448	-20.6037	-18.8896	-15.8694	-11.2684	-9.1809	-8.2662	-6.7106	-5.9083	-2.7698	-0.9211
7956321	85465	0.00342062	-440.9818	-410.7512	-399.8769	-382.2542	-358.7521	-328.9649	-293.9155	-252.6274	-206.4625	-154.1371	-129.9862	-113.4713	-107.6845	-104.0173	-96.8678	-93.1808	-87.1923	-74.424	-66.9386	-61.5465	-52.9222	-52.7323	-45.2032	-43.1144	-39.4912	-36.0885	-32.691	-31.6228	-29.1641	-27.1463	-24.1101	-23.6852	-20.4622	-18.803	-15.7492	-11.182	-9.0321	-8.1721	-6.556	-5.7022	-2.6472	-0.7876
8000000	85700	0.00341594	-441.0816	-410.8315	-399.9242	-382.2501	-358.681	-328.8109	-293.6647	-252.2646	-205.9755	-153.5171	-129.9893	-113.4619	-107.6673	-103.9373	-96.2354	-93.0885	-87.0637	-74.3239	-66.7858	-61.5466	-52.8597	-52.6384	-45.1568	-42.9543	-39.3279	-35.9933	-32.6272	-31.0909	-28.8349	-27.0613	-24.0194	-23.6252	-20.3173	-18.7142	-15.6285	-11.0951	-8.8832	-8.0778	-6.4129	-5.4811	-2.5236	-0.6526
8019904	85806	0.00341382	-441.1268	-410.8679	-399.9455	-382.2481	-358.6486	-328.7407	-293.5505	-252.0995	-205.7539	-153.2351	-129.9907	-113.4577	-107.6595	-103.9032	-95.9519	-93.0422	-87.0029	-74.2783	-66.7161	-61.5466	-52.8422	-52.585	-45.1361	-42.8843	-39.2545	-35.9523	-32.5986	-30.8773	-28.6518	-27.0224	-23.9783	-23.5979	-20.2507	-18.6732	-15.5738	-11.0555	-8.8159	-8.035	-6.3512	-5.3767	-2.4674	-0.5909
8039856	85913	0.0034117	-441.1721	-410.9042	-399.9668	-382.246	-358.616	-328.6703	-293.436	-251.9341	-205.532	-152.9528	-129.9921	-113.4536	-107.6518	-103.8703	-95.672	-92.9923	-86.9404	-74.2328	-66.6464	-61.5466	-52.8285	-52.5278	-45.1154	-42.8159	-39.1816	-35.9123	-32.57	-30.6843	-28.4453	-26.9832	-23.9373	-23.5705	-20.1834	-18.6316	-15.519	-11.0159	-8.7486	-7.9921	-6.2913	-5.2701	-2.411	-0.5291
8060000	86020	0.00340958	-441.2172	-410.9405	-399.988	-382.2438	-358.5832	-328.5997	-293.3213	-251.7683	-205.3096	-152.67	-129.9934	-113.4495	-107.6441	-103.8384	-95.3969	-92.9377	-86.876	-74.1871	-66.5765	-61.5466	-52.8171	-52.4683	-45.0949	-42.749	-39.109	-35.8733	-32.5414	-30.5122	-28.2157	-26.9436	-23.8962	-23.5431	-20.1156	-18.5895	-15.4643	-10.9762	-8.6813	-7.9492	-6.2328	-5.1616	-2.3546	-0.4669
8079948	86127	0.00340746	-441.2625	-410.9769	-400.0092	-382.2415	-358.5503	-328.5289	-293.2063	-251.6021	-205.0866	-152.3865	-129.9946	-113.4455	-107.6365	-103.8074	-95.1278	-92.8769	-86.8095	-74.1413	-66.5064	-61.5466	-52.8072	-52.4072	-45.0743	-42.6835	-39.0366	-35.8349	-32.5126	-30.36	-27.9642	-26.9033	-23.855	-23.5155	-20.047	-18.5468	-15.4094	-10.9363	-8.614	-7.9062	-6.1756	-5.0512	-2.2979	-0.4045
8100088	86234	0.00340534	-441.3077	-411.0132	-400.0304	-382.2391	-358.5173	-328.4579	-293.0909	-251.4355	-204.8631	-152.1026	-129.9959	-113.4415	-107.6289	-103.7773	-94.8671	-92.8084	-86.7407	-74.0955	-66.4361	-61.5466	-52.7983	-52.3452	-45.0539	-42.6194	-38.9644	-35.7971	-32.4836	-30.2259	-27.6938	-26.8619	-23.8135	-23.4878	-19.9779	-18.5033	-15.3545	-10.8964	-8.5468	-7.8631	-6.1195	-4.9392	-2.241	-0.3418
8120283	86342	0.00340322	-441.3529	-411.0494	-400.0515	-382.2367	-358.4841	-328.3866	-292.9753	-251.2685	-204.6393	-151.8183	-129.997	-113.4375	-107.6213	-103.748	-94.6175	-92.7297	-86.6695	-74.0496	-66.3656	-61.5465	-52.7901	-52.2825	-45.0334	-42.5566	-38.8924	-35.7598	-32.4544	-30.1075	-27.4089	-26.8182	-23.7717	-23.46	-19.9082	-18.4591	-15.2995	-10.8563	-8.4796	-7.82	-6.0645	-4.8259	-2.184	-0.2788
8150712	86503	0.00340004	-441.4206	-411.1038	-400.083	-382.2328	-358.434	-328.2793	-292.8013	-251.0172	-204.3024	-151.3906	-129.9987	-113.4317	-107.61	-103.7052	-94.2703	-92.5866	-86.5574	-73.9805	-66.2594	-61.5464	-52.7786	-52.1876	-45.0027	-42.4648	-38.7845	-35.7047	-32.4103	-29.9537	-26.9776	-26.7308	-23.708	-23.4181	-19.8023	-18.3912	-15.217	-10.7961	-8.3787	-7.7551	-5.9833	-4.6534	-2.0982	-0.1837
8181273	86665	0.00339686	-441.4884	-411.1581	-400.1145	-382.2287	-358.3836	-328.1715	-292.6266	-250.7652	-203.9645	-150.9619	-130.0002	-113.4259	-107.5987	-103.6639	-93.9664	-92.4041	-86.4382	-73.9112	-66.1528	-61.5462	-52.7677	-52.0921	-44.9719	-42.3757	-38.677	-35.6503	-32.3656	-29.8218	-26.7459	-26.4218	-23.6422	-23.3756	-19.6951	-18.321	-15.1343	-10.7355	-8.2778	-7.6899	-5.9037	-4.4785	-2.012	-0.0879
8211984	86828	0.00339368	-441.5562	-411.2125	-400.1458	-382.2244	-358.3328	-328.0632	-292.4512	-250.5121	-203.6254	-150.532	-130.0017	-113.4201	-107.5874	-103.6237	-93.7145	-92.1745	-86.3108	-73.8417	-66.0457	-61.546	-52.7573	-51.996	-44.941	-42.2891	-38.5696	-35.5963	-32.3203	-29.7059	-26.6685	-25.9448	-23.573	-23.3325	-19.5864	-18.2482	-15.0514	-10.6748	-8.1769	-7.6245	-5.8253	-4.3015	-1.9254
8242836	86991	0.0033905	-441.6239	-411.2667	-400.177	-382.2199	-358.2817	-327.9544	-292.2751	-250.2582	-203.2853	-150.1009	-130.0029	-113.4145	-107.5761	-103.5845	-93.5152	-91.899	-86.174	-73.772	-65.9382	-61.5458	-52.7471	-51.8997	-44.9099	-42.2049	-38.4624	-35.5426	-32.2745	-29.6019	-26.6039	-25.45	-23.4979	-23.288	-19.4761	-18.1722	-14.9684	-10.6137	-8.076	-7.5588	-5.7479	-4.1227	-1.8383
8306205	87324	0.00338401	-441.762	-411.3773	-400.2404	-382.2101	-358.1765	-327.7309	-291.9138	-249.7376	-202.588	-149.2183	-130.0049	-113.403	-107.5532	-103.5073	-93.2337	-91.2392	-85.8592	-73.6292	-65.7172	-61.5451	-52.7268	-51.7028	-44.846	-42.0402	-38.2443	-35.4333	-32.1789	-29.4145	-26.4776	-24.4715	-23.3061	-23.1783	-19.2464	-18.0042	-14.7984	-10.4882	-7.87	-7.4238	-5.5922	-3.7535	-1.6594
8370000	87660	0.00337753	-441.9001	-411.4877	-400.3033	-382.1993	-358.0697	-327.5053	-291.5497	-249.2132	-201.8861	-148.3312	-130.0061	-113.3917	-107.5303	-103.433	-93.0478	-90.534	-85.484	-73.4853	-65.494	-61.5442	-52.7069	-51.5055	-44.7811	-41.8841	-38.027	-35.3235	-32.0803	-29.2485	-26.352	-23.7524	-23.1428	-22.7743	-19.0096	-17.8105	-14.6274	-10.3615	-7.6639	-7.287	-5.4385	-3.3795	-1.4784
8434780	87998	0.00337104	-442.0381	-411.5979	-400.3657	-382.1877	-357.9615	-327.2776	-291.1826	-248.685	-201.1794	-147.4395	-130.0064	-113.3805	-107.5073	-103.361	-92.9054	-89.8526	-85.0318	-73.3404	-65.2683	-61.5431	-52.6872	-51.3082	-44.7148	-41.7355	-37.811	-35.2123	-31.9783	-29.0958	-26.2256	-23.4416	-23.0461	-21.919	-18.7653	-17.5738	-14.4552	-10.2333	-7.4582	-7.1476	-5.286	-3.0022	-1.295
8500000	88337	0.00336456	-442.176	-411.708	-400.4277	-382.1752	-357.8519	-327.0477	-290.8126	-248.153	-200.4678	-146.5435	-130.0054	-113.3694	-107.4842	-103.2906	-92.7842	-89.2328	-84.4882	-73.1943	-65.0401	-61.5417	-52.6674	-51.111	-44.6471	-41.5938	-37.5969	-35.099	-31.8725	-28.9518	-26.0983	-23.2759	-22.955	-20.9755	-18.5141	-17.2623	-14.2814	-10.1035	-7.2539	-7.0043	-5.1341	-2.6227	-1.1088
8559780	88647	0.00335867	-442.3012	-411.8078	-400.4836	-382.163	-357.751	-326.8371	-290.474	-247.6664	-199.8174	-145.7263	-130.0032	-113.3592	-107.4632	-103.2278	-92.684	-88.7386	-83.909	-73.0605	-64.8304	-61.5401	-52.6493	-50.9321	-44.5842	-41.4704	-37.4046	-34.9935	-31.773	-28.8264	-25.9815	-23.1584	-22.8725	-20.1854	-18.2827	-16.8706	-14.1216	-9.984	-7.0715	-6.8684	-4.9964	-2.2773	-0.9367
8620000	88959	0.00335278	-442.4264	-411.9075	-400.5391	-382.15	-357.6489	-326.6247	-290.133	-247.1767	-199.1631	-144.9058	-129.9997	-113.3491	-107.442	-103.1658	-92.5895	-88.3121	-83.2505	-72.9255	-64.6183	-61.5382	-52.6311	-50.7535	-44.5198	-41.3515	-37.215	-34.8853	-31.6697	-28.7047	-25.8637	-23.0533	-22.7895	-19.5231	-18.0536	-16.3297	-13.9591	-9.8629	-6.8959	-6.7231	-4.8585	-1.9323	-0.761
8680924	89272	0.00334689	-442.5516	-412.007	-400.5942	-382.1363	-357.5456	-326.4104	-289.7894	-246.6837	-198.5046	-144.0825	-129.9945	-113.3389	-107.4208	-103.1044	-92.4985	-87.9474	-82.5212	-72.7891	-64.4036	-61.5359	-52.6128	-50.5753	-44.4537	-41.2368	-37.0288	-34.7738	-31.5625	-28.5859	-25.7449	-22.9548	-22.7056	-19.0104	-17.8317	-15.6244	-13.7915	-9.7398	-6.7317	-6.5632	-4.7204	-1.5892	-0.5805
8742300	89587	0.003341	-442.6766	-412.1065	-400.6489	-382.1219	-357.441	-326.1943	-289.4434	-246.1875	-197.8421	-143.2565	-129.9872	-113.3286	-107.3994	-103.0435	-92.4099	-87.6343	-81.7331	-72.6513	-64.186	-61.5331	-52.5943	-50.3977	-44.3858	-41.1257	-36.8466	-34.6588	-31.4508	-28.4694	-25.625	-22.8605	-22.6207	-18.624	-17.618	-14.7909	-13.6104	-9.6143	-6.5799	-6.387	-4.5819	-1.2505	-0.3931
8870000	90239	0.00332891	-442.9332	-412.3101	-400.76	-382.0898	-357.2224	-325.745	-288.7253	-245.1586	-196.4695	-141.5551	-129.964	-113.3072	-107.3551	-102.9194	-92.2324	-87.1098	-79.9813	-72.3621	-63.7297	-61.5254	-52.5556	-50.035	-44.2404	-40.908	-36.4879	-34.4106	-31.2063	-28.2358	-25.3754	-22.6757	-22.443	-18.0688	-17.1918	-13.4238	-12.6439	-9.345	-6.2894	-5.9889	-4.2956	-0.5868
9000000	90898	0.00331682	-443.1896	-412.5131	-400.8694	-382.0544	-356.9984	-325.2878	-287.9964	-244.1158	-195.0794	-139.8503	-129.9246	-113.2852	-107.31	-102.7957	-92.0579	-86.687	-78.1167	-72.0606	-63.2586	-61.5134	-52.516	-49.6758	-44.0855	-40.7019	-36.1533	-34.1454	-30.9382	-28.0076	-25.1213	-22.4986	-22.2604	-17.6699	-16.7626	-13.0219	-10.6219	-9.0303	-6.002	-5.5539	-4.0058	-0.0155
9122169	91513	0.00330566	-443.4261	-412.7	-400.9689	-382.0187	-356.7868	-324.8586	-287.3138	-243.1404	-193.7802	-138.2822	-129.8649	-113.264	-107.2678	-102.6813	-91.8979	-86.3487	-76.3494	-71.7621	-62.8096	-61.4946	-52.4784	-49.348	-43.9332	-40.5199	-35.868	-33.8867	-30.6664	-27.8004	-24.8826	-22.3396	-22.0877	-17.365	-16.3574	-12.6942	-9.1514	-8.3239	-5.7226	-5.101	-3.7339
9246419	92134	0.0032945	-443.6625	-412.8864	-401.0669	-381.9801	-356.5705	-324.4225	-286.6217	-242.1527	-192.4658	-136.7355	-129.7672	-113.2419	-107.2248	-102.5661	-91.7381	-86.0404	-74.5911	-71.4191	-62.3525	-61.4566	-52.4396	-49.0247	-43.7705	-40.3445	-35.6055	-33.6177	-30.3685	-27.5955	-24.6401	-22.1834	-21.9112	-17.0911	-15.9459	-12.3663	-8.712	-6.7917	-5.3994	-4.5111	-3.4553
9309013	92446	0.00328895	-443.78	-412.9789	-401.1151	-381.9598	-356.4611	-324.203	-286.2739	-241.6567	-191.8061	-135.9826	-129.696	-113.2305	-107.2031	-102.5084	-91.6585	-85.8944	-73.749	-71.2097	-62.131	-61.4187	-52.4198	-48.8658	-43.6855	-40.2594	-35.483	-33.4813	-30.2097	-27.4942	-24.5181	-22.1064	-21.8221	-16.9617	-15.7399	-12.2014	-8.5644	-6.1549	-5.1981	-4.0935	-3.311
9372138	92758	0.0032834	-443.8974	-413.0713	-401.1629	-381.9388	-356.3505	-323.9817	-285.9237	-241.1577	-191.1427	-135.2482	-129.6021	-113.2187	-107.1813	-102.4504	-91.5788	-85.752	-72.9644	-70.9421	-61.9304	-61.3492	-52.3997	-48.7083	-43.5975	-40.1754	-35.3654	-33.3441	-30.0435	-27.3933	-24.3952	-22.0297	-21.732	-16.8353	-15.5337	-12.035	-8.4243	-5.7099	-4.958	-3.5613	-3.1492
9403898	92915	0.00328062	-443.9561	-413.1175	-401.1866	-381.928	-356.2948	-323.8704	-285.7477	-240.907	-190.8095	-134.8907	-129.5441	-113.2127	-107.1703	-102.4213	-91.5389	-85.682	-72.61	-70.7711	-61.8462	-61.2937	-52.3895	-48.6301	-43.5523	-40.1339	-35.3084	-33.2753	-29.9576	-27.343	-24.3334	-21.9914	-21.6867	-16.773	-15.4307	-11.9512	-8.3553	-5.552	-4.8295	-3.2908	-3.0288
9435798	93073	0.00327784	-444.0148	-413.1636	-401.2103	-381.917	-356.2387	-323.7587	-285.5711	-240.6555	-190.4753	-134.5413	-129.4768	-113.2065	-107.1592	-102.3921	-91.4989	-85.6125	-72.2921	-70.5645	-61.7769	-61.2197	-52.3792	-48.5523	-43.5063	-40.0926	-35.2524	-33.2065	-29.8697	-27.2927	-24.2713	-21.9531	-21.6411	-16.7111	-15.3277	-11.8669	-8.2866	-5.4234	-4.7011	-3.1122	-2.7973
9467862	93231	0.00327507	-444.0736	-413.2097	-401.2339	-381.9058	-356.1823	-323.6464	-285.3938	-240.403	-190.1399	-134.2016	-129.3986	-113.2002	-107.1481	-102.3628	-91.4589	-85.5436	-72.0175	-70.3155	-61.7233	-61.1262	-52.3688	-48.4748	-43.4595	-40.0515	-35.1975	-33.1377	-29.7798	-27.2424	-24.209	-21.9149	-21.5953	-16.6496	-15.2247	-11.782	-8.218	-5.3143	-4.5754	-3.0104	-2.4775
9500000	93389	0.00327229	-444.1322	-413.2557	-401.2574	-381.8945	-356.1257	-323.5339	-285.2161	-240.1502	-189.8041	-133.8744	-129.3076	-113.1939	-107.1369	-102.3334	-91.4189	-85.4753	-71.7884	-70.0239	-61.6833	-61.015	-52.3582	-48.3979	-43.4119	-40.0108	-35.1436	-33.0691	-29.6881	-27.1923	-24.1466	-21.8767	-21.5493	-16.5885	-15.1221	-11.6968	-8.1496	-5.2182	-4.4538	-2.9282	-2.1351
9560602	93686	0.00326709	-444.242	-413.3418	-401.3011	-381.8727	-356.0188	-323.3218	-284.8816	-239.6743	-189.1721	-133.3005	-129.0951	-113.1816	-107.1158	-102.278	-91.3437	-85.3484	-71.4601	-69.3829	-61.6337	-60.7686	-52.3382	-48.2548	-43.3205	-39.935	-35.0452	-32.9411	-29.5111	-27.0985	-24.029	-21.8052	-21.4625	-16.4748	-14.9303	-11.5358	-8.0209	-5.0583	-4.2358	-2.7856	-1.4893
9621688	93985	0.0032619	-444.3518	-413.4278	-401.3444	-381.8503	-355.9109	-323.1082	-284.5449	-239.1956	-188.5366	-132.7909	-128.815	-113.1688	-107.0946	-102.2221	-91.2683	-85.2228	-71.2181	-68.6675	-61.6026	-60.484	-52.3177	-48.1132	-43.2259	-39.86	-34.9499	-32.8141	-29.3271	-27.0048	-23.9106	-21.7337	-21.375	-16.3619	-14.7393	-11.373	-7.8914	-4.9128	-4.028	-2.6464	-0.8698
9683263	94286	0.0032567	-444.4616	-413.5137	-401.3874	-381.8272	-355.8018	-322.893	-284.2061	-238.7141	-187.8977	-132.3583	-128.4546	-113.1554	-107.0731	-102.1659	-91.1927	-85.0982	-71.022	-67.9226	-61.5806	-60.1669	-52.2967	-47.9732	-43.128	-39.7857	-34.8572	-32.6882	-29.1363	-26.9112	-23.7915	-21.6621	-21.2866	-16.2493	-14.5495	-11.2082	-7.7607	-4.7746	-3.8274	-2.5073	-0.2933
9745331	94587	0.0032515	-444.5713	-413.5995	-401.4301	-381.8035	-355.6917	-322.6762	-283.8651	-238.2297	-187.2553	-132.008	-128.0087	-113.1413	-107.0514	-102.1091	-91.1168	-84.9744	-70.8503	-67.1746	-61.5628	-59.8174	-52.2751	-47.8348	-43.0267	-39.7119	-34.767	-32.5638	-28.9387	-26.8176	-23.6716	-21.5903	-21.1974	-16.1371	-14.3609	-11.0414	-7.6288	-4.6403	-3.6316	-2.3674
9808231	94892	0.00324627	-444.6815	-413.6856	-401.4727	-381.7789	-355.5799	-322.4566	-283.5201	-237.7399	-186.6059	-131.7339	-127.4792	-113.1264	-107.0294	-102.0515	-91.0402	-84.8504	-70.6916	-66.4362	-61.5467	-59.4303	-52.2526	-47.6972	-42.9214	-39.6383	-34.6786	-32.4403	-28.7333	-26.7236	-23.5504	-21.518	-21.1068	-16.0244	-14.1728	-10.8717	-7.4946	-4.5074	-3.4381	-2.2254
9871639	95198	0.00324105	-444.7917	-413.7715	-401.5149	-381.7537	-355.467	-322.2354	-283.1728	-237.2473	-185.9529	-131.526	-126.8807	-113.1106	-107.0072	-101.9932	-90.9634	-84.7269	-70.5412	-65.7237	-61.5308	-59.0029	-52.2293	-47.5612	-42.8124	-39.5653	-34.592	-32.3184	-28.5213	-26.6295	-23.4284	-21.4455	-21.0154	-15.9117	-13.9863	-10.7	-7.3587	-4.3757	-3.2472	-2.0817
9935560	95506	0.00323582	-444.9019	-413.8574	-401.5567	-381.7278	-355.353	-322.0126	-282.8234	-236.7517	-185.2963	-131.3695	-126.2279	-113.0937	-106.9847	-101.9344	-90.8863	-84.6036	-70.3959	-65.0469	-61.5136	-58.5306	-52.2049	-47.4267	-42.6997	-39.4927	-34.5072	-32.1982	-28.3028	-26.5353	-23.3057	-21.3728	-20.923	-15.7989	-13.8015	-10.5261	-7.2212	-4.2446	-3.0581	-1.9362
10000000	95815	0.0032306	-445.012	-413.9431	-401.5982	-381.7011	-355.2378	-321.7881	-282.4717	-236.2532	-184.6362	-131.2514	-125.5342	-113.0755	-106.962	-101.8749	-90.8089	-84.4805	-70.2539	-64.4141	-61.4935	-58.0092	-52.1791	-47.2936	-42.583	-39.4205	-34.424	-32.0797	-28.0782	-26.441	-23.1822	-21.2998	-20.8296	-15.6858	-13.6185	-10.3501	-7.0817	-4.1136	-2.8706	-1.7886
10110950	96345	0.0032217	-445.1994	-414.0888	-401.6681	-381.6542	-355.039	-321.402	-281.8675	-235.3975	-183.5034	-131.1108	-124.2873	-113.0409	-106.9226	-101.7717	-90.6763	-84.2707	-70.0167	-63.4565	-61.4453	-57.002	-52.1305	-47.0697	-42.3749	-39.2983	-34.2852	-31.8814	-27.682	-26.28	-22.9704	-21.1746	-20.6683	-15.4926	-13.3115	-10.0456	-6.8397	-3.8901	-2.5543	-1.532
10223450	96880	0.0032128	-445.3867	-414.2341	-401.7368	-381.6051	-354.837	-321.011	-281.2566	-234.5331	-182.36	-131.0193	-122.9868	-113.0002	-106.8824	-101.6661	-90.5428	-84.0606	-69.7826	-62.6768	-61.3554	-55.852	-52.0716	-46.8481	-42.1544	-39.1771	-34.1495	-31.6873	-27.2697	-26.1183	-22.7566	-21.0483	-20.5039	-15.2982	-13.0105	-9.7351	-6.5915	-3.6654	-2.2416	-1.2678
10280270	97149	0.00320835	-445.4803	-414.3066	-401.7708	-381.5798	-354.7347	-320.8137	-280.9488	-234.0977	-181.7844	-130.9857	-122.3237	-112.9766	-106.862	-101.6123	-90.4757	-83.9553	-69.6662	-62.3686	-61.2759	-55.2329	-52.0346	-46.7373	-42.0393	-39.1168	-34.0827	-31.5916	-27.058	-26.0371	-22.6489	-20.9846	-20.4205	-15.2004	-12.8624	-9.5779	-6.4649	-3.5524	-2.0865	-1.1327
10337510	97419	0.0032039	-445.5739	-414.3791	-401.8046	-381.554	-354.6315	-320.6151	-280.6391	-233.66	-181.2059	-130.958	-121.6548	-112.9503	-106.8413	-101.5576	-90.4083	-83.8497	-69.5499	-62.1276	-61.1568	-54.594	-51.9876	-46.626	-41.9208	-39.0566	-34.0164	-31.4966	-26.8427	-25.9555	-22.5408	-20.9205	-20.3362	-15.1023	-12.7158	-9.4192	-6.3367	-3.439	-1.9323	-0.9953
10409770	97759	0.00319833	-445.6911	-414.4697	-401.8464	-381.521	-354.5011	-320.3646	-280.2488	-233.1087	-180.4774	-130.93	-120.8117	-112.9124	-106.8151	-101.488	-90.3236	-83.717	-69.4043	-61.9249	-60.9421	-53.7881	-51.8992	-46.4846	-41.7675	-38.9814	-33.934	-31.3786	-26.5686	-25.8524	-22.4046	-20.8397	-20.2294	-14.9788	-12.5344	-9.2187	-6.1735	-3.2962	-1.7405	-0.82
10453170	97962	0.003195	-445.761	-414.5237	-401.8712	-381.5008	-354.4227	-320.2142	-280.0148	-232.7781	-180.0408	-130.9162	-120.3075	-112.8865	-106.7992	-101.4457	-90.2728	-83.6376	-69.3175	-61.8474	-60.7862	-53.3269	-51.8118	-46.3985	-41.6732	-38.9367	-33.8852	-31.3086	-26.4031	-25.7904	-22.3231	-20.7912	-20.165	-14.9047	-12.4274	-9.0982	-6.0749	-3.2106	-1.6268	-0.7136
10482670	98100	0.00319275	-445.8082	-414.5601	-401.8879	-381.487	-354.3693	-320.1121	-279.8559	-232.5538	-179.7446	-130.9079	-119.9664	-112.8672	-106.7883	-101.4168	-90.2384	-83.5838	-69.2587	-61.808	-60.6734	-53.0394	-51.7228	-46.3392	-41.6083	-38.9064	-33.8522	-31.2614	-26.2903	-25.7479	-22.2677	-20.7582	-20.1211	-14.8545	-12.3555	-9.0163	-6.0075	-3.1525	-1.5502	-0.6409
10512270	98239	0.0031905	-445.8555	-414.5966	-401.9045	-381.4731	-354.3158	-320.0096	-279.6965	-232.3288	-179.4476	-130.9004	-119.6255	-112.8463	-106.7774	-101.3876	-90.2039	-83.5299	-69.1999	-61.7765	-60.557	-52.7877	-51.5947	-46.2787	-41.5423	-38.8762	-33.8194	-31.2143	-26.1772	-25.705	-22.2123	-20.725	-20.077	-14.8041	-12.284	-8.9341	-5.9397	-3.0943	-1.4738	-0.5675
10527110	98308	0.00318938	-445.8791	-414.6148	-401.9128	-381.4661	-354.2889	-319.9582	-279.6167	-232.2161	-179.2988	-130.8968	-119.4553	-112.8352	-106.7719	-101.3729	-90.1866	-83.5029	-69.1704	-61.763	-60.498	-52.6798	-51.5116	-46.2479	-41.5089	-38.8611	-33.803	-31.1908	-26.1206	-25.6833	-22.1845	-20.7084	-20.0548	-14.7789	-12.2484	-8.893	-5.9056	-3.0651	-1.4357	-0.5305
10541980	98377	0.00318825	-445.9028	-414.6331	-401.921	-381.4591	-354.262	-319.9068	-279.5367	-232.1033	-179.1499	-130.8935	-119.2853	-112.8235	-106.7664	-101.3582	-90.1693	-83.4758	-69.141	-61.7509	-60.4386	-52.5855	-51.4143	-46.2167	-41.4753	-38.846	-33.7867	-31.1673	-26.064	-25.6614	-22.1567	-20.6918	-20.0326	-14.7537	-12.2129	-8.8517	-5.8714	-3.0359	-1.3977	-0.4934
10571790	98516	0.003186	-445.95	-414.6695	-401.9375	-381.4449	-354.208	-319.8037	-279.3765	-231.8772	-178.8515	-130.8872	-118.9461	-112.7986	-106.7553	-101.3284	-90.1346	-83.4217	-69.0821	-61.7298	-60.3192	-52.4369	-51.1783	-46.1529	-41.4072	-38.8158	-33.754	-31.1204	-25.951	-25.6166	-22.101	-20.6584	-19.988	-14.7031	-12.1421	-8.769	-5.8025	-2.9773	-1.3218	-0.4188
10631730	98795	0.0031815	-446.0445	-414.7422	-401.9702	-381.416	-354.0993	-319.5965	-279.0546	-231.4233	-178.2526	-130.8764	-118.2726	-112.7406	-106.7328	-101.2679	-90.0651	-83.3131	-68.9642	-61.6973	-60.0804	-52.2593	-50.584	-46.0179	-41.2675	-38.7554	-33.6889	-31.0267	-25.7307	-25.5188	-21.9892	-20.5911	-19.8979	-14.6014	-12.0019	-8.603	-5.6634	-2.8598	-1.1708	-0.2674
10692090	99075	0.003177	-446.1389	-414.8149	-402.0026	-381.3867	-353.9897	-319.3879	-278.731	-230.9671	-177.6508	-130.8675	-117.6094	-112.6685	-106.7099	-101.206	-89.9953	-83.204	-68.846	-61.6734	-59.844	-52.164	-49.9109	-45.8683	-41.1229	-38.6951	-33.6241	-30.9332	-25.5428	-25.3854	-21.8769	-20.5232	-19.8068	-14.4993	-11.8631	-8.4361	-5.5221	-2.7416	-1.0208	-0.1135
10814110	99639	0.003168	-446.3276	-414.9599	-402.0666	-381.3263	-353.7678	-318.9669	-278.0784	-230.0476	-176.4388	-130.8545	-116.3421	-112.456	-106.6624	-101.0772	-89.8548	-82.9843	-68.6088	-61.6399	-59.3835	-52.0558	-48.5421	-45.486	-40.816	-38.5746	-33.4949	-30.7459	-25.3219	-24.9542	-21.6509	-20.3851	-19.6212	-14.2933	-11.5901	-8.1002	-5.2332	-2.5032	-0.7234
10875780	99923	0.0031635	-446.422	-415.0322	-402.0982	-381.2952	-353.6555	-318.7545	-277.7494	-229.5844	-175.8284	-130.8499	-115.7601	-112.2946	-106.6377	-101.0098	-89.7841	-82.8735	-68.4897	-61.6275	-59.1595	-52.0171	-47.9129	-45.2178	-40.6516	-38.5144	-33.4306	-30.652	-25.2328	-24.7126	-21.5371	-20.3148	-19.5267	-14.1894	-11.4557	-7.9314	-5.0854	-2.383	-0.5759
10937880	100208	0.003159	-446.5163	-415.1045	-402.1295	-381.2636	-353.5423	-318.5406	-277.4186	-229.1188	-175.2151	-130.8463	-115.2341	-112.0756	-106.6122	-100.9402	-89.7131	-82.7622	-68.3702	-61.6168	-58.9394	-51.9827	-47.3647	-44.8643	-40.4775	-38.4541	-33.3664	-30.5576	-25.146	-24.466	-21.4228	-20.2434	-19.4309	-14.0849	-11.3227	-7.7622	-4.9354	-2.2621	-0.4292
11000430	100494	0.0031545	-446.6105	-415.1766	-402.1605	-381.2315	-353.4281	-318.3255	-277.0859	-228.6508	-174.599	-130.8437	-114.7824	-111.7815	-106.5855	-100.8678	-89.6417	-82.6502	-68.2504	-61.6073	-58.7228	-51.9508	-46.9227	-44.4059	-40.2907	-38.3937	-33.3022	-30.4626	-25.06	-24.2157	-21.308	-20.1709	-19.3338	-13.9797	-11.191	-7.5927	-4.783	-2.1404	-0.2829
11063420	100781	0.00315	-446.7048	-415.2487	-402.1912	-381.1987	-353.3131	-318.1089	-276.7514	-228.1804	-173.9799	-130.8418	-114.4173	-111.4008	-106.5575	-100.7923	-89.57	-82.5375	-68.1303	-61.5988	-58.5093	-51.9205	-46.5873	-43.8491	-40.0868	-38.3333	-33.2381	-30.3669	-24.9742	-23.9625	-21.1926	-20.097	-19.2354	-13.8739	-11.0606	-7.423	-4.6283	-2.0181	-0.1372
11190770	101359	0.003141	-446.8931	-415.3924	-402.2517	-381.1315	-353.0801	-317.6718	-276.0768	-227.2324	-172.7329	-130.8402	-113.9306	-110.4014	-106.495	-100.6294	-89.4256	-82.3099	-67.8887	-61.5837	-58.0904	-51.8618	-46.1427	-42.5736	-39.5932	-38.212	-33.11	-30.1724	-24.8026	-23.4488	-20.9602	-19.9443	-19.0343	-13.6603	-10.8032	-7.0834	-4.3117	-1.7713
11255130	101650	0.0031365	-446.9872	-415.4642	-402.2815	-381.097	-352.9623	-317.4512	-275.7367	-226.7547	-172.105	-130.8402	-113.7775	-109.8181	-106.4582	-100.5405	-89.3529	-82.1949	-67.7673	-61.5768	-57.8844	-51.8329	-45.9867	-41.9347	-39.2733	-38.1511	-33.0459	-30.0729	-24.7165	-23.1888	-20.8432	-19.8648	-18.9314	-13.5523	-10.6762	-6.9136	-4.1498	-1.6467
11319960	101943	0.003132	-447.0813	-415.5358	-402.311	-381.0619	-352.8434	-317.2291	-275.3948	-226.2746	-171.474	-130.8407	-113.6626	-109.2056	-106.4147	-100.4452	-89.2798	-82.0791	-67.6454	-61.5702	-57.6803	-51.8039	-45.8552	-41.3465	-38.8749	-38.0897	-32.9818	-29.9716	-24.6301	-22.9273	-20.7257	-19.7826	-18.827	-13.4437	-10.5502	-6.744	-3.9855	-1.5214
11385240	102236	0.0031275	-447.1753	-415.6073	-402.3402	-381.0262	-352.7236	-317.0057	-275.0509	-225.7921	-170.8402	-130.8416	-113.5742	-108.5826	-106.3592	-100.342	-89.2063	-81.9623	-67.5231	-61.5638	-57.4779	-51.7746	-45.7401	-40.839	-38.3781	-38.0268	-32.9177	-29.8679	-24.5435	-22.6645	-20.6076	-19.6971	-18.7209	-13.3343	-10.4252	-6.5747	-3.8187	-1.3954
11451010	102531	0.003123	-447.2693	-415.6787	-402.369	-380.9899	-352.6029	-316.7809	-274.7051	-225.3071	-170.2033	-130.8428	-113.5044	-107.9714	-106.2792	-100.229	-89.1324	-81.8446	-67.4004	-61.5576	-57.2772	-51.7449	-45.6366	-40.4218	-37.9735	-37.7685	-32.8534	-29.7612	-24.4565	-22.4009	-20.4891	-19.6076	-18.613	-13.224	-10.3011	-6.4056	-3.6494	-1.2685
11517910	102830	0.00311846	-447.3642	-415.7507	-402.3979	-380.9527	-352.48	-316.5524	-274.3539	-224.8147	-169.557	-130.8444	-113.4471	-107.4062	-106.1417	-100.1022	-89.0573	-81.7246	-67.276	-61.5514	-57.0759	-51.7144	-45.5406	-40.0786	-37.9071	-37.0791	-32.7884	-29.6495	-24.3682	-22.1345	-20.3692	-19.512	-18.502	-13.1119	-10.1767	-6.2353	-3.476	-1.1396
11551540	102980	0.00311618	-447.4117	-415.7867	-402.4122	-380.9339	-352.4181	-316.4376	-274.1776	-224.5675	-169.2327	-130.8454	-113.4224	-107.166	-106.0309	-100.0331	-89.0196	-81.6642	-67.2136	-61.5483	-56.9757	-51.6989	-45.4952	-39.9294	-37.8753	-36.7088	-32.7559	-29.5919	-24.3239	-22.0015	-20.3092	-19.4619	-18.4457	-13.0555	-10.1148	-6.1502	-3.3883	-1.0749
11585260	103130	0.00311391	-447.4591	-415.8226	-402.4264	-380.9149	-352.3561	-316.3226	-274.001	-224.32	-168.908	-130.8463	-113.3997	-106.9697	-105.8783	-99.9596	-88.9818	-81.6036	-67.1511	-61.5453	-56.876	-51.6833	-45.4512	-39.7916	-37.8436	-36.327	-32.7233	-29.5328	-24.2796	-21.8689	-20.2493	-19.4099	-18.3889	-12.9989	-10.0531	-6.0654	-3.3002	-1.01
11619150	103281	0.00311164	-447.5065	-415.8585	-402.4406	-380.8957	-352.2938	-316.2071	-273.8236	-224.0716	-168.5821	-130.8474	-113.3787	-106.8213	-105.6797	-99.8808	-88.9439	-81.5426	-67.0885	-61.5422	-56.7765	-51.6674	-45.4084	-39.6627	-37.8118	-35.9357	-32.6907	-29.4719	-24.2351	-21.7366	-20.1894	-19.3558	-18.3314	-12.942	-9.9916	-5.9805	-3.2113	-0.9449
11653120	103432	0.00310937	-447.5539	-415.8943	-402.4546	-380.8764	-352.2313	-316.0914	-273.646	-223.8228	-168.2559	-130.8485	-113.3593	-106.715	-105.4429	-99.7962	-88.9059	-81.4814	-67.0258	-61.5392	-56.6774	-51.6513	-45.3667	-39.5413	-37.78	-35.5383	-32.6581	-29.4092	-24.1905	-21.6051	-20.1297	-19.2995	-18.2734	-12.885	-9.9303	-5.8959	-3.1219	-0.8796
11721490	103735	0.00310483	-447.6486	-415.966	-402.4826	-380.8374	-352.1054	-315.8586	-273.289	-223.3228	-167.6004	-130.8508	-113.3244	-106.5823	-104.9028	-99.6062	-88.8295	-81.3579	-66.9	-61.5331	-56.48	-51.6184	-45.2862	-39.3146	-37.7158	-34.7308	-32.5927	-29.276	-24.1009	-21.3441	-20.0108	-19.1784	-18.1551	-12.7701	-9.8081	-5.7268	-2.9412	-0.7483
11859720	104345	0.00309574	-447.8381	-416.1089	-402.5374	-380.7573	-351.8506	-315.3886	-272.569	-222.3151	-166.2804	-130.8561	-113.2661	-106.447	-103.7826	-99.1146	-88.675	-81.1067	-66.6468	-61.5208	-56.0889	-51.5494	-45.1344	-38.9029	-37.5848	-33.1165	-32.4614	-28.9629	-23.9204	-20.8383	-19.7782	-18.8938	-17.9082	-12.5372	-9.5657	-5.3901	-2.5727	-0.4832
12000000	104960	0.00308665	-448.0273	-416.2514	-402.5909	-380.6748	-351.5917	-314.9127	-271.8409	-221.297	-164.9478	-130.8618	-113.2183	-106.3635	-102.7973	-98.4133	-88.518	-80.8492	-66.3917	-61.5082	-55.7027	-51.475	-44.9918	-38.5231	-37.4484	-32.3296	-31.6051	-28.5228	-23.7376	-20.3662	-19.5566	-18.5348	-17.6403	-12.2996	-9.3255	-5.0552	-2.1951	-0.2148
12086500	105338	0.00308111	-448.1426	-416.338	-402.6229	-380.6232	-351.4319	-314.6197	-271.3931	-220.6713	-164.1296	-130.8655	-113.1926	-106.3211	-102.3054	-97.8597	-88.4209	-80.6887	-66.2353	-61.5002	-55.4701	-51.4265	-44.9083	-38.3022	-37.3609	-32.2486	-30.8132	-28.1281	-23.625	-20.1005	-19.428	-18.2758	-17.4588	-12.1522	-9.18	-4.8519	-1.9607	-0.0496
12173790	105718	0.00307558	-448.2578	-416.4245	-402.6544	-380.5707	-351.2706	-314.3245	-270.9423	-220.0417	-163.3066	-130.8693	-113.1689	-106.2817	-101.9	-97.2111	-88.3226	-80.525	-66.0781	-61.4921	-55.2397	-51.3751	-44.827	-38.0889	-37.2683	-32.1673	-30.1793	-27.5849	-23.5114	-19.8525	-19.304	-17.9932	-17.2514	-12.0026	-9.035	-4.6491	-1.7232
12261870	106099	0.00307004	-448.373	-416.5107	-402.6854	-380.5172	-351.1077	-314.027	-270.4885	-219.4081	-162.479	-130.8731	-113.1468	-106.2442	-101.5708	-96.4797	-88.2228	-80.3579	-65.9202	-61.4836	-55.0119	-51.3204	-44.7474	-37.8846	-37.168	-32.0855	-29.7143	-26.8891	-23.3965	-19.6211	-19.1834	-17.7049	-16.9978	-11.8503	-8.8905	-4.4467	-1.4827
12350740	106483	0.0030645	-448.4881	-416.5968	-402.7159	-380.4628	-350.9433	-313.7272	-270.0315	-218.7704	-161.6466	-130.8769	-113.126	-106.2078	-101.3027	-95.6826	-88.1211	-80.1869	-65.7615	-61.4749	-54.787	-51.2618	-44.6694	-37.6923	-37.0563	-32.0034	-29.3785	-26.0881	-23.2799	-19.4042	-19.064	-17.4363	-16.6716	-11.6949	-8.7464	-4.2446	-1.2392
12533780	107269	0.00305325	-448.7217	-416.7711	-402.7763	-380.3491	-350.6043	-313.1111	-269.0935	-217.4625	-159.9411	-130.8844	-113.0865	-106.1358	-100.8872	-93.9275	-87.9064	-79.8247	-65.437	-61.456	-54.3412	-51.1287	-44.5149	-37.3552	-36.7759	-31.8351	-28.9055	-24.3638	-23.0328	-19.008	-18.8046	-16.9869	-15.7448	-11.3663	-8.4545	-3.8344	-0.7362
12720220	108064	0.003042	-448.9551	-416.9447	-402.8345	-380.2314	-350.2588	-312.4854	-268.1424	-216.1377	-158.2161	-130.8915	-113.0499	-106.0648	-100.5754	-92.0761	-87.6724	-79.4372	-65.1095	-61.4353	-53.9148	-50.9713	-44.3645	-37.0989	-36.4132	-31.6646	-28.5493	-22.9367	-22.57	-18.7094	-18.4482	-16.6058	-14.5158	-11.0079	-8.163	-3.4232	-0.2222
12910150	108868	0.00303075	-449.1882	-417.1176	-402.8906	-380.1095	-349.9065	-311.8498	-267.178	-214.7957	-156.4716	-130.8977	-113.015	-105.9939	-100.3199	-90.2196	-87.3883	-79.0136	-64.7794	-61.4122	-53.5144	-50.7821	-44.2173	-36.8952	-35.9953	-31.4916	-28.2353	-22.5961	-21.2479	-18.4779	-17.9808	-16.2421	-13.0598	-10.5762	-7.871	-3.0086
13006440	109273	0.00302512	-449.3047	-417.2037	-402.9179	-380.0469	-349.7278	-311.5284	-266.6908	-214.1181	-155.5921	-130.9003	-112.998	-105.9582	-100.2051	-89.3368	-87.1937	-78.7832	-64.6133	-61.3995	-53.3265	-50.6729	-44.1445	-36.8034	-35.7753	-31.4041	-28.0853	-22.4672	-20.6543	-18.369	-17.7096	-16.0609	-12.3	-10.2869	-7.7245	-2.799
13054960	109477	0.00302231	-449.363	-417.2467	-402.9313	-380.0152	-349.6377	-311.3666	-266.4457	-213.7774	-155.1502	-130.9015	-112.9896	-105.9404	-100.15	-88.9259	-87.0658	-78.6619	-64.53	-61.3929	-53.2359	-50.6141	-44.1083	-36.759	-35.6634	-31.3601	-28.0112	-22.4035	-20.3854	-18.3152	-17.5636	-15.9699	-11.9354	-10.1026	-7.6509	-2.6932
13103630	109681	0.0030195	-449.4211	-417.2896	-402.9446	-379.9833	-349.5474	-311.2044	-266.2002	-213.4362	-154.7078	-130.9026	-112.9813	-105.9225	-100.0963	-88.5511	-86.9039	-78.5364	-64.4467	-61.386	-53.1479	-50.5526	-44.0722	-36.7154	-35.5508	-31.3159	-27.9378	-22.3401	-20.1357	-18.2616	-17.4106	-15.8789	-11.5976	-9.8777	-7.5773	-2.5868
13152340	109884	0.0030167	-449.479	-417.3323	-402.9577	-379.9513	-349.4569	-311.0422	-265.9547	-213.0951	-154.2658	-130.9035	-112.973	-105.9046	-100.0439	-88.2273	-86.6949	-78.4062	-64.3636	-61.3789	-53.0628	-50.4882	-44.0363	-36.6726	-35.4377	-31.2717	-27.8649	-22.2769	-19.9054	-18.2084	-17.2511	-15.7878	-11.2991	-9.6021	-7.5036	-2.48
13201340	110089	0.0030139	-449.537	-417.375	-402.9706	-379.9189	-349.366	-310.8792	-265.708	-212.7525	-153.8222	-130.9044	-112.9648	-105.8866	-99.9925	-87.9631	-86.4283	-78.2702	-64.2803	-61.3716	-52.9802	-50.4208	-44.0005	-36.6302	-35.3239	-31.2272	-27.7922	-22.2136	-19.6924	-18.1552	-17.0845	-15.6962	-11.0449	-9.2693	-7.4293	-2.372
13250550	110294	0.00301109	-449.595	-417.4176	-402.9834	-379.8863	-349.2746	-310.7156	-265.4607	-212.409	-153.3775	-130.9051	-112.9566	-105.8686	-99.942	-87.7579	-86.1065	-78.1278	-64.1969	-61.3639	-52.9004	-50.3502	-43.9648	-36.5883	-35.2096	-31.1826	-27.7197	-22.1502	-19.4961	-18.102	-16.9115	-15.6042	-10.8334	-8.8835	-7.3544	-2.2629
13300000	110499	0.00300829	-449.6529	-417.4602	-402.9961	-379.8534	-349.1828	-310.5515	-265.2125	-212.0645	-152.9319	-130.9056	-112.9484	-105.8505	-99.8923	-87.5997	-85.7422	-77.9783	-64.1134	-61.356	-52.8233	-50.2764	-43.9292	-36.5467	-35.0948	-31.1377	-27.6473	-22.0866	-19.3152	-18.0487	-16.7328	-15.5118	-10.6563	-8.4545	-7.278	-2.1522
13399520	110912	0.00300269	-449.7686	-417.5452	-403.021	-379.7869	-348.9979	-310.2212	-264.7136	-211.372	-152.0369	-130.9063	-112.9321	-105.8142	-99.7951	-87.3706	-84.9438	-77.6537	-63.9463	-61.3391	-52.6774	-50.1189	-43.8581	-36.4643	-34.8639	-31.0474	-27.5025	-21.9587	-18.9938	-17.9418	-16.3608	-15.3252	-10.3697	-7.5248	-7.1045	-1.9249
13500000	111327	0.00299709	-449.8843	-417.63	-403.0454	-379.7192	-348.8113	-309.8884	-264.2111	-210.675	-151.1374	-130.9062	-112.9158	-105.7776	-99.7	-87.2006	-84.1175	-77.2879	-63.7789	-61.3207	-52.5426	-49.9484	-43.7871	-36.3828	-34.6318	-30.9561	-27.3573	-21.8299	-18.7169	-17.8342	-15.9751	-15.1361	-10.1328	-7.0225	-6.4314	-1.686
13677510	112057	0.00298732	-450.086	-417.7775	-403.0865	-379.5986	-348.4815	-309.3018	-263.3265	-209.4486	-149.558	-130.9038	-112.8873	-105.7131	-99.5384	-86.9601	-82.7288	-76.5194	-63.4872	-61.284	-52.3329	-49.6204	-43.6634	-36.2417	-34.2249	-30.7943	-27.1026	-21.6026	-18.3112	-17.6435	-15.2887	-14.7969	-9.7698	-6.7436	-4.6092	-1.2156
13857950	112793	0.00297754	-450.2874	-417.9243	-403.1259	-379.4745	-348.1463	-308.7073	-262.4311	-208.2083	-147.9659	-130.898	-112.8587	-105.6476	-99.3803	-86.7476	-81.5011	-75.5363	-63.1968	-61.2395	-52.1521	-49.2563	-43.5397	-36.1013	-33.8166	-30.629	-26.8448	-21.3714	-17.971	-17.4477	-14.629	-14.4182	-9.4308	-6.4782	-2.9016	-0.5734
14041370	113537	0.00296777	-450.4887	-418.0705	-403.1636	-379.3471	-347.8056	-308.1047	-261.5248	-206.9539	-146.362	-130.8874	-112.8297	-105.5812	-99.2246	-86.5459	-80.4868	-74.3066	-62.9096	-61.1842	-51.9956	-48.8602	-43.4156	-35.9611	-33.4083	-30.4597	-26.5829	-21.1362	-17.6732	-17.2449	-14.1667	-13.8393	-9.098	-6.2111	-1.6679
14227840	114289	0.002958	-450.6897	-418.216	-403.1994	-379.2162	-347.4593	-307.4941	-260.6075	-205.6853	-144.7482	-130.8703	-112.8002	-105.5136	-99.0701	-86.3489	-79.6777	-72.8478	-62.6288	-61.113	-51.8583	-48.4362	-43.2907	-35.8206	-33.0011	-30.2856	-26.3163	-20.8966	-17.4051	-17.0329	-13.8007	-13.1664	-8.7639	-5.94	-0.954
14416130	115043	0.00294829	-450.8892	-418.36	-403.2331	-379.0826	-347.1097	-306.8793	-259.6852	-204.411	-143.138	-130.8441	-112.7702	-105.4454	-98.9173	-86.1551	-79.0313	-71.2254	-62.3607	-61.019	-51.7366	-47.991	-43.1656	-35.6805	-32.5993	-30.1071	-26.0461	-20.6539	-17.1608	-16.8124	-13.4416	-12.498	-8.4266	-5.6654	-0.459
14607540	115804	0.00293859	-451.0885	-418.5032	-403.2651	-378.9456	-346.7544	-306.2563	-258.7518	-203.1223	-141.5248	-130.8044	-112.7394	-105.3761	-98.7645	-85.9617	-78.4919	-69.4887	-62.1086	-60.8905	-51.626	-47.524	-43.039	-35.5396	-32.2015	-29.9219	-25.7702	-20.4064	-16.9326	-16.5824	-13.0786	-11.8397	-8.081	-5.3843	-0.0348
15000000	117349	0.00291917	-451.4865	-418.7879	-403.3234	-378.6607	-346.0266	-304.9852	-256.8508	-200.5009	-138.325	-130.6495	-112.6744	-105.2339	-98.4574	-85.5736	-77.5978	-65.8843	-61.6516	-60.4665	-51.4273	-46.5296	-42.7795	-35.2547	-31.4258	-29.5254	-25.1995	-19.8954	-16.5045	-16.1016	-12.3352	-10.5671	-7.356	-4.7955
15175160	118032	0.00291071	-451.6597	-418.9111	-403.3465	-378.532	-345.702	-304.4205	-256.0079	-199.3398	-136.9719	-130.5204	-112.6442	-105.1703	-98.3222	-85.4032	-77.2522	-64.3818	-61.4314	-60.168	-51.3467	-46.0706	-42.6628	-35.1288	-31.1	-29.3383	-24.9423	-19.6655	-16.3236	-15.8863	-12.0033	-10.0357	-7.023	-4.5241
15263790	118376	0.00290648	-451.7463	-418.9726	-403.3575	-378.4665	-345.5379	-304.1354	-255.5827	-198.7544	-136.3158	-130.4299	-112.6285	-105.1381	-98.2542	-85.3175	-77.0855	-63.7001	-61.2896	-59.9699	-51.3073	-45.8346	-42.6032	-35.0654	-30.9405	-29.2405	-24.8117	-19.5487	-16.2336	-15.7775	-11.8354	-9.776	-6.852	-4.384
15308300	118549	0.00290436	-451.7895	-419.0032	-403.3629	-378.4335	-345.4554	-303.9924	-255.3694	-198.4609	-135.9958	-130.376	-112.6206	-105.122	-98.2201	-85.2746	-77.0034	-63.3906	-61.2048	-59.8518	-51.2878	-45.7151	-42.5731	-35.0336	-30.862	-29.1906	-24.7459	-19.49	-16.1887	-15.723	-11.751	-9.648	-6.7656	-4.3128
15352880	118721	0.00290225	-451.8327	-419.0338	-403.3681	-378.4004	-345.3729	-303.8493	-255.1561	-198.1673	-135.6828	-130.315	-112.6125	-105.1058	-98.186	-85.2318	-76.9223	-63.1092	-61.1084	-59.7172	-51.2684	-45.5946	-42.5429	-35.0018	-30.7842	-29.14	-24.6799	-19.431	-16.1439	-15.6684	-11.6665	-9.5214	-6.6785	-4.2409
15397800	118895	0.00290014	-451.876	-419.0644	-403.3733	-378.367	-345.2898	-303.7051	-254.9413	-197.8718	-135.376	-130.2457	-112.6043	-105.0894	-98.1517	-85.1886	-76.8415	-62.8589	-60.9995	-59.561	-51.249	-45.4726	-42.5122	-34.9697	-30.707	-29.0883	-24.6133	-19.3715	-16.0989	-15.6135	-11.5814	-9.3954	-6.5905	-4.1678
15442800	119069	0.00289802	-451.9192	-419.095	-403.3784	-378.3335	-345.2065	-303.5609	-254.7263	-197.5762	-135.0784	-130.1671	-112.596	-105.0731	-98.1174	-85.1455	-76.7615	-62.6442	-60.8798	-59.3801	-51.2297	-45.3495	-42.4814	-34.9377	-30.6307	-29.0359	-24.5465	-19.3118	-16.054	-15.5585	-11.4961	-9.271	-6.5018	-4.0939
15487960	119243	0.00289591	-451.9624	-419.1255	-403.3833	-378.2998	-345.1229	-303.4162	-254.5109	-197.2798	-134.7908	-130.0778	-112.5876	-105.0567	-98.083	-85.1024	-76.682	-62.4648	-60.7526	-59.1705	-51.2105	-45.2252	-42.4502	-34.9055	-30.5552	-28.9826	-24.4793	-19.2518	-16.0092	-15.5034	-11.4105	-9.1478	-6.4126	-4.019
15533210	119417	0.00289379	-452.0056	-419.156	-403.3882	-378.266	-345.0392	-303.2714	-254.2952	-196.9832	-134.5152	-129.9765	-112.5791	-105.0402	-98.0486	-85.0592	-76.6032	-62.3182	-60.6232	-58.9307	-51.1914	-45.0998	-42.4187	-34.8733	-30.4808	-28.9285	-24.4119	-19.1916	-15.9643	-15.4483	-11.3247	-9.026	-6.3228	-3.9431
15624450	119767	0.00288956	-452.092	-419.2169	-403.3977	-378.1977	-344.8705	-302.9796	-253.8609	-196.3863	-134.0027	-129.7309	-112.5616	-105.007	-97.9792	-84.9724	-76.4466	-62.1032	-60.3727	-58.3605	-51.153	-44.8443	-42.3544	-34.8085	-30.3341	-28.8172	-24.2758	-19.0698	-15.8743	-15.3373	-11.1517	-8.7858	-6.1408	-3.7877
15716200	120118	0.00288533	-452.1783	-419.2776	-403.4069	-378.1287	-344.7009	-302.6867	-253.4251	-195.7874	-133.5539	-129.4201	-112.5435	-104.9736	-97.9096	-84.8854	-76.2919	-61.9606	-60.1476	-57.6936	-51.1146	-44.5835	-42.2884	-34.7433	-30.1914	-28.7022	-24.1384	-18.947	-15.7843	-15.226	-10.9778	-8.5512	-5.9569	-3.6276
15808230	120469	0.00288112	-452.2641	-419.3379	-403.4156	-378.0594	-344.5308	-302.3934	-252.9889	-195.1882	-133.1767	-129.0383	-112.5248	-104.94	-97.8399	-84.7985	-76.1391	-61.8612	-59.9471	-56.9641	-51.076	-44.3178	-42.2204	-34.678	-30.0532	-28.5836	-24.0003	-18.8233	-15.6944	-15.1147	-10.8033	-8.3229	-5.772	-3.4629
15900920	120822	0.00287692	-452.3499	-419.3981	-403.4239	-377.9893	-344.3597	-302.0983	-252.5505	-194.586	-132.8695	-128.584	-112.5054	-104.9062	-97.7697	-84.7112	-75.9874	-61.7876	-59.7633	-56.1944	-51.037	-44.0458	-42.1493	-34.6123	-29.9189	-28.4608	-23.8607	-18.6983	-15.6042	-15.0028	-10.6276	-8.0999	-5.5855	-3.2924
15994270	121176	0.00287271	-452.4357	-419.4581	-403.4318	-377.9184	-344.1873	-301.8017	-252.1098	-193.9811	-132.6261	-128.0636	-112.4851	-104.8721	-97.6991	-84.6237	-75.8365	-61.7301	-59.5904	-55.4021	-50.9971	-43.7675	-42.074	-34.546	-29.7886	-28.334	-23.7198	-18.5718	-15.5138	-14.8904	-10.4507	-7.8821	-5.3982	-3.1157
16088370	121532	0.0028685	-452.5214	-419.518	-403.4394	-377.8468	-344.0137	-301.5031	-251.6665	-193.3728	-132.436	-127.4869	-112.4638	-104.8377	-97.6279	-84.5357	-75.6863	-61.6833	-59.4243	-54.598	-50.9555	-43.4829	-41.9926	-34.4791	-29.6621	-28.2028	-23.5775	-18.4439	-15.4229	-14.7774	-10.2723	-7.6693	-5.2104	-2.9321
16278590	122248	0.00286008	-452.6928	-419.6374	-403.4534	-377.7015	-343.663	-300.901	-250.7732	-192.1476	-132.1732	-126.2103	-112.4177	-104.7679	-97.484	-84.3588	-75.3875	-61.61	-59.1039	-52.9934	-50.8602	-42.9042	-41.7961	-34.3435	-29.4204	-27.9287	-23.2886	-18.1836	-15.24	-14.5496	-9.9118	-7.2583	-4.8362	-2.543
16374760	122609	0.00285587	-452.7784	-419.6969	-403.4598	-377.6276	-343.4858	-300.5973	-250.323	-191.5304	-132.0826	-125.5284	-112.3925	-104.7326	-97.4111	-84.2698	-75.2386	-61.58	-58.9469	-52.2161	-50.7939	-42.6221	-41.6645	-34.2746	-29.3048	-27.7859	-23.1421	-18.0511	-15.1479	-14.4348	-9.7296	-7.0596	-4.6508	-2.3366
16423070	122790	0.00285377	-452.8211	-419.7266	-403.4628	-377.5905	-343.3969	-300.4449	-250.0972	-191.2209	-132.0446	-125.1798	-112.3793	-104.7148	-97.3745	-84.2252	-75.1643	-61.5662	-58.8689	-51.8466	-50.7457	-42.4885	-41.5837	-34.2399	-29.2482	-27.7132	-23.0684	-17.9843	-15.1017	-14.3772	-9.6381	-6.9618	-4.5588	-2.2305
16471630	122971	0.00285167	-452.8639	-419.7563	-403.4658	-377.5531	-343.3075	-300.2918	-249.8705	-190.9102	-132.0106	-124.8264	-112.3656	-104.697	-97.3376	-84.1804	-75.0899	-61.553	-58.7909	-51.5054	-50.6718	-42.3628	-41.489	-34.2049	-29.1923	-27.6395	-22.9943	-17.917	-15.0553	-14.3194	-9.5461	-6.865	-4.4672	-2.1221
16495890	123061	0.00285062	-452.8852	-419.7711	-403.4672	-377.5344	-343.2628	-300.2154	-249.7573	-190.7551	-131.9949	-124.6488	-112.3585	-104.688	-97.3192	-84.1581	-75.0529	-61.5467	-58.7522	-51.3551	-50.6167	-42.304	-41.4358	-34.1874	-29.1647	-27.6025	-22.9572	-17.8833	-15.0322	-14.2905	-9.5001	-6.817	-4.4218	-2.0673
16520280	123152	0.00284956	-452.9066	-419.7859	-403.4686	-377.5156	-343.2179	-300.1387	-249.6436	-190.5994	-131.9801	-124.4698	-112.3513	-104.679	-97.3007	-84.1356	-75.0157	-61.5405	-58.7133	-51.2246	-50.5421	-42.2478	-41.3781	-34.1697	-29.1372	-27.5652	-22.9199	-17.8494	-15.009	-14.2615	-9.4539	-6.7692	-4.3763	-2.0118
16532490	123198	0.00284904	-452.9173	-419.7933	-403.4693	-377.5061	-343.1955	-300.1002	-249.5866	-190.5214	-131.973	-124.38	-112.3477	-104.6745	-97.2914	-84.1244	-74.9971	-61.5374	-58.6939	-51.1685	-50.4959	-42.2208	-41.3476	-34.1609	-29.1235	-27.5464	-22.9013	-17.8324	-14.9973	-14.2469	-9.4308	-6.7454	-4.3537	-1.9839
16544710	123243	0.00284851	-452.928	-419.8007	-403.47	-377.4967	-343.173	-300.0618	-249.5297	-190.4434	-131.9661	-124.29	-112.344	-104.67	-97.2821	-84.1132	-74.9786	-61.5344	-58.6745	-51.119	-50.4436	-42.1945	-41.3158	-34.152	-29.1099	-27.5276	-22.8826	-17.8154	-14.9857	-14.2324	-9.4077	-6.7216	-4.331	-1.9559
16569180	123335	0.00284746	-452.9494	-419.8155	-403.4714	-377.4778	-343.128	-299.9848	-249.4157	-190.2873	-131.9527	-124.1093	-112.3365	-104.661	-97.2635	-84.0907	-74.9414	-61.5284	-58.6357	-51.0386	-50.3211	-42.1443	-41.2489	-34.1343	-29.0827	-27.4899	-22.8451	-17.7813	-14.9624	-14.2033	-9.3613	-6.6742	-4.2859	-1.8994
16618270	123517	0.00284535	-452.9922	-419.8451	-403.4741	-377.4398	-343.0377	-299.8304	-249.1872	-189.9744	-131.928	-123.746	-112.3211	-104.6429	-97.2261	-84.0456	-74.8671	-61.5168	-58.5581	-50.935	-50.0228	-42.0528	-41.1008	-34.0985	-29.0289	-27.4138	-22.77	-17.7128	-14.9157	-14.145	-9.2684	-6.5801	-4.1961	-1.7848
16667540	123700	0.00284325	-453.0349	-419.8746	-403.4766	-377.4017	-342.9471	-299.6757	-248.9582	-189.6607	-131.9058	-123.3801	-112.305	-104.6246	-97.1885	-84.0005	-74.7928	-61.5057	-58.4806	-50.8733	-49.6879	-41.9721	-40.9345	-34.0625	-28.9756	-27.337	-22.6945	-17.6439	-14.8688	-14.0865	-9.1751	-6.4869	-4.107	-1.6681
16866370	124436	0.00283483	-453.2058	-419.9924	-403.4859	-377.2472	-342.5817	-299.0523	-248.0362	-188.3988	-131.8357	-121.8988	-112.232	-104.5509	-97.0363	-83.8191	-74.4953	-61.4644	-58.1707	-50.742	-48.3001	-41.7206	-40.1166	-33.9148	-28.7681	-27.0224	-22.3896	-17.3639	-14.6802	-13.8508	-8.7987	-6.1216	-3.7575	-1.1814
17068170	125178	0.00282642	-453.3764	-420.1095	-403.4935	-377.0896	-342.2114	-298.4217	-247.1044	-187.1245	-131.7875	-120.4022	-112.1403	-104.4755	-96.8804	-83.636	-74.1971	-61.4273	-57.8602	-50.6508	-47.0025	-41.519	-39.0981	-33.7593	-28.5676	-26.6967	-22.0795	-17.0767	-14.4895	-13.612	-8.417	-5.7667	-3.4189	-0.6638
17273000	125927	0.002818	-453.5469	-420.2261	-403.4995	-376.9289	-341.8361	-297.7839	-246.1627	-185.8376	-131.7538	-118.9105	-112.0177	-104.3982	-96.7204	-83.4513	-73.8977	-61.3929	-57.5485	-50.567	-45.8518	-41.3269	-37.9058	-33.5904	-28.3723	-26.3598	-21.7644	-16.782	-14.2965	-13.3699	-8.0298	-5.42	-3.0903	-0.1182
17480910	126682	0.00280958	-453.7172	-420.3422	-403.5039	-376.7649	-341.4556	-297.1386	-245.211	-184.5379	-131.73	-117.452	-111.8413	-104.3188	-96.5553	-83.265	-73.5966	-61.3604	-57.2355	-50.4847	-44.8607	-41.1273	-36.5688	-33.3933	-28.1807	-26.01	-21.4445	-16.4794	-14.101	-13.1243	-7.6371	-5.0796	-2.77
17691960	127445	0.00280117	-453.8874	-420.4576	-403.5065	-376.5978	-341.0699	-296.4858	-244.2492	-183.2253	-131.7134	-116.0786	-111.5637	-104.2367	-96.3841	-83.0768	-73.2935	-61.3292	-56.921	-50.402	-44.0225	-40.9094	-35.1676	-33.1139	-27.9915	-25.6436	-21.1198	-16.1687	-13.9031	-12.8749	-7.2387	-4.7439	-2.4561
17798630	127828	0.00279696	-453.9724	-420.5151	-403.5072	-376.513	-340.8752	-296.1567	-243.7646	-182.5645	-131.7071	-115.4518	-111.3605	-104.1945	-96.2959	-82.9822	-73.1412	-61.314	-56.7633	-50.3601	-43.656	-40.7904	-34.515	-32.8828	-27.8975	-25.4521	-20.9557	-16.0101	-13.8032	-12.7488	-7.0375	-4.5775	-2.301
17906200	128214	0.00279275	-454.0574	-420.5724	-403.5075	-376.4273	-340.6791	-295.8254	-243.2771	-181.8998	-131.702	-114.8854	-111.0937	-104.1511	-96.2055	-82.8869	-72.9881	-61.2989	-56.6052	-50.3177	-43.3213	-40.6629	-33.9855	-32.5057	-27.8038	-25.2529	-20.7901	-15.8493	-13.7025	-12.6215	-6.8347	-4.4116	-2.1467
18014580	128602	0.00278854	-454.1423	-420.6296	-403.5074	-376.3409	-340.4816	-295.4922	-242.787	-181.2319	-131.6978	-114.3966	-110.7474	-104.1065	-96.1128	-82.7913	-72.8343	-61.284	-56.4467	-50.2748	-43.0169	-40.5258	-33.6324	-31.9357	-27.7101	-25.044	-20.6232	-15.6861	-13.6011	-12.493	-6.6305	-4.2463	-1.9931
18123690	128990	0.00278433	-454.2272	-420.6867	-403.5068	-376.2536	-340.2829	-295.1573	-242.2947	-180.5612	-131.6944	-113.9955	-110.3129	-104.0604	-96.0175	-82.6952	-72.68	-61.2692	-56.2881	-50.2313	-42.741	-40.3782	-33.4106	-31.225	-27.6166	-24.8227	-20.4548	-15.5208	-13.4991	-12.3635	-6.425	-4.0815	-1.8401
18233680	129381	0.00278013	-454.312	-420.7435	-403.5058	-376.1655	-340.0828	-294.8204	-241.7995	-179.8869	-131.6918	-113.6799	-109.7924	-104.0123	-95.9192	-82.5986	-72.5249	-61.2545	-56.1291	-50.187	-42.4915	-40.2192	-33.2541	-30.4459	-27.5231	-24.5842	-20.2848	-15.353	-13.3963	-12.2328	-6.2179	-3.9171	-1.6873
18344500	129774	0.00277592	-454.3968	-420.8003	-403.5043	-376.0766	-339.8813	-294.4815	-241.3017	-179.2093	-131.6899	-113.4377	-109.1993	-103.9614	-95.8174	-82.5015	-72.369	-61.2398	-55.97	-50.1421	-42.2666	-40.0487	-33.1284	-29.6425	-27.4293	-24.3224	-20.1127	-15.1828	-13.2927	-12.1008	-6.0094	-3.7528	-1.5347
18568680	130564	0.0027675	-454.5662	-420.9133	-403.5001	-375.8961	-339.4744	-293.7978	-240.2982	-177.844	-131.6876	-113.1096	-107.8676	-103.8467	-95.6012	-82.3058	-72.0546	-61.2106	-55.6512	-50.0496	-41.8818	-39.6744	-32.9154	-28.0672	-27.2398	-23.69	-19.7603	-14.8342	-13.083	-11.8328	-5.5878	-3.4245	-1.2293
18796300	131362	0.00275908	-454.7355	-421.0256	-403.4941	-375.7122	-339.0619	-293.1062	-239.2839	-176.4653	-131.6871	-112.9053	-106.4527	-103.6939	-95.3626	-82.108	-71.7366	-61.1813	-55.3322	-49.9531	-41.5674	-39.263	-32.7218	-27.0629	-26.664	-22.819	-19.3894	-14.4739	-12.8695	-11.5591	-5.1601	-3.0959	-0.9228
18911420	131764	0.00275487	-454.8201	-421.0816	-403.4904	-375.619	-338.8536	-292.7574	-238.7726	-175.7707	-131.6874	-112.8296	-105.7582	-103.5818	-95.2323	-82.0083	-71.5762	-61.1666	-55.1726	-49.9033	-41.4306	-39.0468	-32.6272	-26.9643	-26.089	-22.262	-19.1907	-14.2886	-12.7612	-11.4199	-4.944	-2.9312	-0.7688
19027410	132167	0.00275067	-454.9046	-421.1374	-403.4862	-375.5248	-338.6439	-292.4065	-238.2587	-175.0729	-131.688	-112.7655	-105.1145	-103.412	-95.0923	-81.908	-71.4146	-61.1519	-55.0132	-49.8522	-41.3045	-38.8254	-32.5329	-26.8685	-25.5979	-21.6264	-18.9752	-14.0992	-12.6517	-11.279	-4.7262	-2.7663	-0.6143
19086370	132372	0.00274854	-454.9473	-421.1655	-403.484	-375.4769	-338.5374	-292.2284	-237.9979	-174.7189	-131.6883	-112.7366	-104.8275	-103.2869	-95.0174	-81.8571	-71.3326	-61.1444	-54.9327	-49.8259	-41.2442	-38.712	-32.4852	-26.8202	-25.3803	-21.2823	-18.8558	-14.0017	-12.5958	-11.2072	-4.6156	-2.6828	-0.5359
19145650	132577	0.00274641	-454.99	-421.1936	-403.4816	-375.4288	-338.4303	-292.0496	-237.736	-174.3634	-131.6888	-112.7096	-104.5793	-103.1226	-94.939	-81.806	-71.2502	-61.1369	-54.8522	-49.7992	-41.1858	-38.5975	-32.4372	-26.7718	-25.1806	-20.9289	-18.7256	-13.9028	-12.5394	-11.1347	-4.5043	-2.599	-0.4572
19205160	132783	0.00274428	-455.0328	-421.2217	-403.4791	-375.3803	-338.3229	-291.8702	-237.4734	-174.0071	-131.6893	-112.6842	-104.3771	-102.9131	-94.8569	-81.7547	-71.1674	-61.1294	-54.7716	-49.7722	-41.1294	-38.4823	-32.3891	-26.7233	-24.997	-20.5736	-18.5802	-13.8023	-12.4825	-11.0619	-4.3926	-2.5151	-0.3783
19264910	132990	0.00274215	-455.0755	-421.2498	-403.4765	-375.3317	-338.2151	-291.6902	-237.2101	-173.6499	-131.6899	-112.6604	-104.2202	-102.6597	-94.7707	-81.7032	-71.0844	-61.1219	-54.6912	-49.7447	-41.0745	-38.3665	-32.3406	-26.6748	-24.8275	-20.2254	-18.4131	-13.7001	-12.4252	-10.9885	-4.2805	-2.431	-0.2991
19324870	133196	0.00274002	-455.1182	-421.2778	-403.4737	-375.2828	-338.107	-291.5098	-236.9461	-173.2919	-131.6905	-112.6378	-104.1008	-102.371	-94.6799	-81.6516	-71.001	-61.1143	-54.6109	-49.7169	-41.0212	-38.2503	-32.292	-26.6262	-24.67	-19.8953	-18.2161	-13.5959	-12.3672	-10.9146	-4.168	-2.3468	-0.2198
19385080	133404	0.00273789	-455.1609	-421.3058	-403.4709	-375.2337	-337.9985	-291.3288	-236.6814	-172.9329	-131.6912	-112.6164	-104.0089	-102.0576	-94.584	-81.5998	-70.9173	-61.1067	-54.5307	-49.6887	-40.9693	-38.1337	-32.2429	-26.5775	-24.5228	-19.5943	-17.9802	-13.4895	-12.3086	-10.8402	-4.055	-2.2625	-0.1402
19506130	133820	0.00273363	-455.2463	-421.3615	-403.4648	-375.1348	-337.7805	-290.9654	-236.1501	-172.2127	-131.6927	-112.5766	-103.8763	-101.3915	-94.3744	-81.4958	-70.7491	-61.0915	-54.3706	-49.631	-40.869	-37.8998	-32.1438	-26.4798	-24.2532	-19.1073	-17.374	-13.2682	-12.1886	-10.6898	-3.8277	-2.0932
19751140	134657	0.00272512	-455.4168	-421.4726	-403.4512	-374.9343	-337.34	-290.2321	-235.0786	-170.7612	-131.696	-112.5062	-103.7039	-100.0374	-93.861	-81.2855	-70.4083	-61.0606	-54.0523	-49.5101	-40.6796	-37.431	-31.94	-26.283	-23.7826	-18.4864	-15.7934	-12.7702	-11.927	-10.3816	-3.3671	-1.7521
19874990	135079	0.00272086	-455.502	-421.5278	-403.4437	-374.8327	-337.1177	-289.8625	-234.5388	-170.0306	-131.6978	-112.4745	-103.6373	-99.3937	-93.5422	-81.1793	-70.2357	-61.045	-53.8944	-49.4467	-40.5893	-37.1974	-31.8349	-26.1839	-23.57	-18.2577	-14.9655	-12.476	-11.767	-10.2233	-3.1338	-1.5801
20000000	135503	0.0027166	-455.5872	-421.583	-403.4357	-374.7301	-336.8936	-289.4901	-233.9954	-169.2953	-131.6998	-112.4445	-103.5765	-98.7899	-93.17	-81.072	-70.0613	-61.0293	-53.7372	-49.381	-40.5011	-36.9645	-31.7271	-26.084	-23.3671	-18.0503	-14.1992	-12.1528	-11.5373	-10.061	-2.8976	-1.4067
20144600	135992	0.00271171	-455.6849	-421.646	-403.4259	-374.6111	-336.6346	-289.0603	-233.3684	-168.4475	-131.702	-112.4118	-103.5114	-98.1611	-92.6682	-80.9477	-69.859	-61.011	-53.5582	-49.3026	-40.402	-36.6991	-31.6001	-25.9687	-23.1437	-17.8273	-13.4767	-11.8331	-11.0421	-9.867	-2.6231	-1.206
20290450	136483	0.00270682	-455.7824	-421.7088	-403.4154	-374.491	-336.3737	-288.6278	-232.7377	-167.5952	-131.7043	-112.3808	-103.4494	-97.6092	-92.0803	-80.8222	-69.6544	-60.9925	-53.381	-49.2209	-40.3048	-36.4361	-31.469	-25.8525	-22.9279	-17.6138	-12.9459	-11.6178	-10.2554	-9.646	-2.3443	-1.0033
20437700	136978	0.00270194	-455.88	-421.7714	-403.4043	-374.3695	-336.1106	-288.1921	-232.1028	-166.7376	-131.7066	-112.3509	-103.3893	-97.1353	-91.406	-80.6949	-69.447	-60.9738	-53.2056	-49.1355	-40.209	-36.1759	-31.3334	-25.7355	-22.7175	-17.4059	-12.5505	-11.4476	-9.5915	-9.1058	-2.0596	-0.7982
20586200	137475	0.00269705	-455.9775	-421.8337	-403.3925	-374.2469	-335.8457	-287.7538	-231.4642	-165.8757	-131.7089	-112.3222	-103.3304	-96.7338	-90.6534	-80.566	-69.2368	-60.9549	-53.0325	-49.0462	-40.1144	-35.9192	-31.193	-25.6175	-22.5116	-17.2021	-12.2293	-11.2924	-9.3404	-8.0563	-1.7674	-0.5905
20887360	138476	0.00268727	-456.1722	-421.9577	-403.3669	-373.9976	-335.3095	-286.8679	-230.1748	-164.137	-131.7133	-112.2669	-103.2148	-96.1035	-88.9601	-80.3011	-68.8063	-60.9163	-52.6937	-48.8544	-39.9273	-35.4176	-30.896	-25.3785	-22.1089	-16.8016	-11.6876	-10.9935	-8.9192	-5.7713	-1.1435	-0.1651
21194040	139489	0.0026775	-456.3667	-422.0807	-403.3386	-373.7431	-334.765	-285.97	-228.8691	-162.3788	-131.7172	-112.2139	-103.1003	-95.6309	-87.0984	-80.0228	-68.3604	-60.8767	-52.3669	-48.6432	-39.742	-34.9348	-30.5744	-25.1352	-21.7144	-16.4071	-11.208	-10.6927	-8.4922	-3.5423	-0.3979
21511450	140530	0.00266757	-456.5641	-422.2047	-403.3071	-373.4791	-334.2031	-285.045	-227.5256	-160.5724	-131.7205	-112.1616	-102.9841	-95.2462	-85.1168	-79.7152	-67.8875	-60.8352	-52.0495	-48.406	-39.5542	-34.467	-30.2193	-24.8831	-21.3184	-16.0098	-10.7591	-10.3729	-8.0413	-1.682
21834820	141582	0.00265764	-456.7612	-422.3277	-403.2726	-373.2095	-333.6323	-284.1074	-226.1648	-158.746	-131.7226	-112.1101	-102.8672	-94.9185	-83.1223	-79.3511	-67.3889	-60.7923	-51.7488	-48.144	-39.3661	-34.0247	-29.8331	-24.6256	-20.9252	-15.6149	-10.35	-10.0256	-7.5711	-0.5368
21998790	142113	0.00265267	-456.8597	-422.3888	-403.2543	-373.0726	-333.3435	-283.6336	-225.4779	-157.8253	-131.7231	-112.0845	-102.8084	-94.7686	-82.1586	-79.1196	-67.1275	-60.7703	-51.6051	-48.003	-39.2717	-33.8137	-29.6278	-24.4946	-20.729	-15.418	-10.1619	-9.8384	-7.3284	-0.1427
22164290	142646	0.0026477	-456.9581	-422.4496	-403.2352	-372.9343	-333.0525	-283.1567	-224.7866	-156.8997	-131.7232	-112.0589	-102.7494	-94.6254	-81.2621	-78.8147	-66.8561	-60.7479	-51.4662	-47.8552	-39.177	-33.6097	-29.4143	-24.362	-20.533	-15.2213	-9.9834	-9.643	-7.0806
22247750	142915	0.00264522	-457.0073	-422.48	-403.2254	-372.8646	-332.9059	-282.9166	-224.4388	-156.4344	-131.723	-112.0462	-102.7197	-94.5559	-80.8582	-78.6158	-66.7159	-60.7365	-51.3984	-47.7786	-39.1294	-33.5101	-29.3043	-24.295	-20.4349	-15.1229	-9.8969	-9.5427	-6.9547
22331460	143183	0.00264274	-457.0564	-422.5103	-403.2154	-372.7945	-332.759	-282.6761	-224.0904	-155.9686	-131.7228	-112.0334	-102.69	-94.4876	-80.4981	-78.3738	-66.5728	-60.7251	-51.3318	-47.7003	-39.0818	-33.4125	-29.1924	-24.2277	-20.3368	-15.0247	-9.812	-9.4414	-6.8277
22415570	143453	0.00264025	-457.1056	-422.5405	-403.2052	-372.7241	-332.6115	-282.4348	-223.741	-155.5016	-131.7223	-112.0206	-102.6602	-94.4204	-80.1886	-78.0813	-66.4262	-60.7135	-51.2665	-47.6203	-39.0341	-33.3165	-29.0784	-24.1599	-20.2388	-14.9265	-9.7283	-9.3391	-6.6995
22500000	143723	0.00263777	-457.1546	-422.5706	-403.1949	-372.6534	-332.4636	-282.1928	-223.3907	-155.0337	-131.7218	-112.0079	-102.6303	-94.3542	-79.931	-77.738	-66.276	-60.7017	-51.2024	-47.5386	-38.9863	-33.2223	-28.9626	-24.0917	-20.1407	-14.8283	-9.6456	-9.2362	-6.5702
22646870	144191	0.00263349	-457.2394	-422.6224	-403.1765	-372.5304	-332.2065	-281.7727	-222.7826	-154.2223	-131.7203	-111.9857	-102.5784	-94.2417	-79.5887	-77.0444	-66.0062	-60.6812	-51.0943	-47.3933	-38.9033	-33.0635	-28.7578	-23.9727	-19.9711	-14.6588	-9.5043	-9.0572	-6.3438
22794730	144661	0.0026292	-457.324	-422.674	-403.1576	-372.4065	-331.9481	-281.3506	-222.172	-153.4086	-131.7183	-111.9635	-102.5264	-94.1316	-79.3355	-76.269	-65.7223	-60.6602	-50.9899	-47.243	-38.8201	-32.9097	-28.5476	-23.8524	-19.8015	-14.4895	-9.3644	-8.8775	-6.1142
23094300	145608	0.00262064	-457.4931	-422.7767	-403.1181	-372.1551	-331.4256	-280.4983	-220.9398	-151.7697	-131.7123	-111.9188	-102.4213	-93.9162	-78.9585	-74.6181	-65.0988	-60.6165	-50.7906	-46.9267	-38.6522	-32.6157	-28.1108	-23.6068	-19.4611	-14.1504	-9.0859	-8.5171	-5.6445
23398810	146565	0.00261207	-457.662	-422.8785	-403.0762	-371.8993	-330.8961	-279.6358	-219.6939	-150.1176	-131.7028	-111.8735	-102.3149	-93.7057	-78.654	-72.9628	-64.3776	-60.5698	-50.6037	-46.5902	-38.4823	-32.3386	-27.6545	-23.3539	-19.1189	-13.8109	-8.8072	-8.157	-5.1621
23708350	147532	0.0026035	-457.8308	-422.9795	-403.032	-371.639	-330.3594	-278.7629	-218.4341	-148.4534	-131.6888	-111.8275	-102.2072	-93.4985	-78.3775	-71.3884	-63.5222	-60.5176	-50.428	-46.2342	-38.3103	-32.0765	-27.1814	-23.0926	-18.7747	-13.4707	-8.5265	-7.7979	-4.6681
24023290	148508	0.00259492	-457.9994	-423.0798	-402.9854	-371.374	-329.815	-277.8789	-217.1592	-146.7773	-131.6685	-111.7805	-102.0981	-93.2933	-78.1134	-69.9545	-62.4967	-60.4516	-50.2617	-45.8589	-38.1356	-31.827	-26.6942	-22.8214	-18.4278	-13.1292	-8.2429	-7.4395	-4.1631
24182810	149000	0.00259063	-458.0837	-423.1296	-402.9612	-371.2396	-329.5398	-277.4327	-216.5161	-145.9355	-131.6553	-111.7566	-102.0429	-93.1911	-77.9837	-69.3045	-61.919	-60.4033	-50.1818	-45.6642	-38.0473	-31.7064	-26.4462	-22.6815	-18.2532	-12.958	-8.0997	-7.2604	-3.9068
24343470	149495	0.00258635	-458.1678	-423.1792	-402.9364	-371.1043	-329.2632	-276.9842	-215.8701	-145.093	-131.6395	-111.7324	-101.9875	-93.0893	-77.8551	-68.7039	-61.3225	-60.3184	-50.1038	-45.465	-37.9584	-31.5885	-26.1964	-22.5387	-18.0781	-12.7867	-7.9558	-7.0815	-3.6486
24424300	149743	0.00258421	-458.2099	-423.2039	-402.9237	-371.0362	-329.1242	-276.7591	-215.5458	-144.6714	-131.6305	-111.7202	-101.9596	-93.0384	-77.7911	-68.422	-61.0433	-60.236	-50.0654	-45.3637	-37.9137	-31.5304	-26.0708	-22.466	-17.9903	-12.7009	-7.8836	-6.9921	-3.5188
24464840	149867	0.00258314	-458.2309	-423.2162	-402.9174	-371.002	-329.0545	-276.6462	-215.3833	-144.4604	-131.6257	-111.7141	-101.9456	-93.013	-77.7591	-68.2855	-60.9201	-60.1733	-50.0464	-45.3126	-37.8913	-31.5016	-26.0078	-22.4294	-17.9463	-12.658	-7.8473	-6.9474	-3.4536
24505460	149991	0.00258207	-458.2519	-423.2286	-402.911	-370.9678	-328.9847	-276.5332	-215.2206	-144.2495	-131.6207	-111.7079	-101.9317	-92.9875	-77.7272	-68.152	-60.8142	-60.0899	-50.0274	-45.2612	-37.8689	-31.4729	-25.9448	-22.3925	-17.9022	-12.615	-7.811	-6.9027	-3.3884
24546170	150116	0.00258099	-458.2729	-423.2409	-402.9045	-370.9335	-328.9147	-276.42	-215.0576	-144.0385	-131.6154	-111.7017	-101.9176	-92.9621	-77.6952	-68.0214	-60.7284	-59.9831	-50.0086	-45.2096	-37.8464	-31.4443	-25.8817	-22.3553	-17.8581	-12.5721	-7.7747	-6.858	-3.323
24586970	150240	0.00257992	-458.2939	-423.2532	-402.898	-370.8991	-328.8447	-276.3066	-214.8944	-143.8275	-131.6099	-111.6955	-101.9036	-92.9367	-77.6633	-67.8936	-60.6623	-59.8534	-49.9898	-45.1576	-37.8238	-31.4158	-25.8185	-22.318	-17.814	-12.5291	-7.7383	-6.8133	-3.2576
24669000	150491	0.00257778	-458.336	-423.2778	-402.8849	-370.8299	-328.7039	-276.0788	-214.5666	-143.4045	-131.598	-111.683	-101.8754	-92.8858	-77.5995	-67.6459	-60.5742	-59.5396	-49.9524	-45.0525	-37.7785	-31.3592	-25.6916	-22.2423	-17.7253	-12.4428	-7.6651	-6.7237	-3.1259
24833720	150992	0.00257349	-458.42	-423.3267	-402.8582	-370.6911	-328.4216	-275.6223	-213.9097	-142.5609	-131.5708	-111.6578	-101.8188	-92.7841	-77.4721	-67.1831	-60.4841	-58.7921	-49.8787	-44.8391	-37.6874	-31.2475	-25.438	-22.0882	-17.5478	-12.2705	-7.5183	-6.5447	-2.862
25000000	151497	0.0025692	-458.504	-423.3754	-402.8309	-370.5508	-328.1371	-275.1625	-213.2484	-141.718	-131.5376	-111.6321	-101.7618	-92.6822	-77.3447	-66.7576	-60.433	-57.9619	-49.8059	-44.6205	-37.5955	-31.1373
25281230	152347	0.00256202	-458.6444	-423.4565	-402.7839	-370.3136	-327.6569	-274.3873	-212.1342	-140.3165	-131.4646	-111.5881	-101.6655	-92.5115	-77.1314	-66.1166	-60.3719	-56.4696	-49.6854	-44.2429	-37.4398	-30.9565	-24.7599	-21.6523	-17.0684	-11.8073	-7.1203	-6.0647	-2.148
25566420	153204	0.00255485	-458.7847	-423.537	-402.735	-370.073	-327.1714	-273.6043	-211.0094	-138.9357	-131.3592	-111.5426	-101.5681	-92.3402	-76.9176	-65.5449	-60.3208	-54.8921	-49.5642	-43.8483	-37.2818	-30.7791	-24.3396	-21.3589	-16.7647	-11.5159	-6.8672	-5.7629	-1.6963
25855650	154068	0.00254768	-458.9248	-423.6168	-402.6843	-369.8289	-326.6803	-272.8134	-209.8741	-137.5958	-131.2015	-111.4955	-101.4695	-92.1681	-76.703	-65.0242	-60.2729	-53.2638	-49.4374	-43.4332	-37.121	-30.6047	-23.9258	-21.0465	-16.458	-11.2232	-6.6109	-5.4599	-1.2414
26148980	154939	0.0025405	-459.0647	-423.6959	-402.6319	-369.5813	-326.1836	-272.0145	-208.7281	-136.3327	-130.9556	-111.4463	-101.3697	-91.9949	-76.4872	-64.5406	-60.2261	-51.6251	-49.2875	-42.9915	-36.9573	-30.4324	-23.5213	-20.7124	-16.1481	-10.9291	-6.3513	-5.1551	-0.784
26296280	155375	0.00253693	-459.1342	-423.735	-402.6051	-369.457	-325.9348	-271.6146	-208.1546	-135.7515	-130.783	-111.421	-101.3197	-91.9084	-76.3796	-64.311	-60.203	-50.8358	-49.1826	-42.759	-36.8748	-30.3475	-23.3246	-20.5376	-15.9928	-10.7824	-6.2211	-5.003	-0.5559
26370310	155594	0.00253515	-459.1689	-423.7545	-402.5915	-369.3945	-325.8098	-271.4138	-207.8669	-135.4766	-130.68	-111.4081	-101.2946	-91.8651	-76.3257	-64.1983	-60.1914	-50.4628	-49.1084	-42.6388	-36.8332	-30.3052	-23.2275	-20.4478	-15.9148	-10.7089	-6.1556	-4.9267	-0.4417
26444400	155812	0.00253337	-459.2035	-423.7739	-402.5779	-369.332	-325.6849	-271.2132	-207.5794	-135.2145	-130.5646	-111.3951	-101.2694	-91.8218	-76.2718	-64.0872	-60.1798	-50.122	-49.004	-42.5158	-36.7915	-30.263	-23.1314	-20.3567	-15.8368	-10.6355	-6.0902	-4.8506	-0.3277
26481800	155922	0.00253248	-459.221	-423.7837	-402.571	-369.3004	-325.6219	-271.1119	-207.4343	-135.0876	-130.5012	-111.3885	-101.2567	-91.7999	-76.2447	-64.0318	-60.174	-49.969	-48.933	-42.4527	-36.7704	-30.2419	-23.0834	-20.3103	-15.7974	-10.5986	-6.0571	-4.8121	-0.2702
26519060	156032	0.00253159	-459.2383	-423.7934	-402.5641	-369.269	-325.5591	-271.0112	-207.2899	-134.9649	-130.4345	-111.3819	-101.2441	-91.7782	-76.2176	-63.9769	-60.1682	-49.8337	-48.846	-42.3889	-36.7494	-30.2208	-23.0358	-20.2636	-15.7582	-10.5618	-6.0242	-4.7739	-0.2131
26556390	156142	0.0025307	-459.2556	-423.803	-402.5572	-369.2375	-325.4962	-270.9102	-207.1453	-134.8459	-130.3639	-111.3752	-101.2315	-91.7564	-76.1906	-63.9223	-60.1624	-49.7175	-48.7403	-42.3243	-36.7283	-30.1998	-22.9885	-20.2166	-15.7189	-10.525	-5.9912	-4.7357	-0.1559
26593780	156252	0.00252981	-459.2729	-423.8127	-402.5502	-369.2059	-325.4333	-270.8092	-207.0006	-134.7307	-130.2894	-111.3685	-101.2188	-91.7346	-76.1635	-63.868	-60.1566	-49.6209	-48.6154	-42.2586	-36.7071	-30.1788	-22.9414	-20.1691	-15.6796	-10.4881	-5.9582	-4.6974	-0.0987
26668760	156472	0.00252803	-459.3076	-423.832	-402.5362	-369.1426	-325.3071	-270.6067	-206.7106	-134.5121	-130.128	-111.355	-101.1934	-91.691	-76.1093	-63.7602	-60.1449	-49.4788	-48.3163	-42.1239	-36.6646	-30.1368	-22.8478	-20.0729	-15.6007	-10.4144	-5.892	-4.6206
26744000	156692	0.00252625	-459.3422	-423.8512	-402.5221	-369.0791	-325.1806	-270.4038	-206.4199	-134.3099	-129.9496	-111.3412	-101.1679	-91.6472	-76.055	-63.6533	-60.1333	-49.3838	-47.9729	-41.9844	-36.6218	-30.0948	-22.7552	-19.9751	-15.5216	-10.3405	-5.8256	-4.5438
26895280	157135	0.00252269	-459.4114	-423.8896	-402.4936	-368.9515	-324.9265	-269.9963	-205.8365	-133.9556	-129.5409	-111.313	-101.1166	-91.5594	-75.9462	-63.442	-60.1098	-49.2618	-47.2297	-41.6881	-36.5353	-30.0111	-22.5727	-19.7742	-15.3626	-10.1925	-5.692	-4.3896
27047850	157580	0.00251913	-459.4807	-423.9279	-402.4645	-368.8227	-324.6706	-269.5863	-205.2496	-133.6658	-129.0642	-111.2839	-101.065	-91.4711	-75.8368	-63.2335	-60.0862	-49.1772	-46.4694	-41.3629	-36.4474	-29.9273	-22.3937	-19.566	-15.2022	-10.0439	-5.5575	-4.2346
27356030	158475	0.002512	-459.619	-424.004	-402.405	-368.5627	-324.1549	-268.7605	-204.0683	-133.2508	-127.9408	-111.2223	-100.9608	-91.2933	-75.6171	-62.8242	-60.0384	-49.0452	-45.0157	-40.5933	-36.2664	-29.7598	-22.0471	-19.129	-14.8781	-9.7457	-5.2858	-3.9226
27668620	159378	0.00250487	-459.7572	-424.0793	-402.3435	-368.2991	-323.6334	-267.9264	-202.8759	-132.9908	-126.6545	-111.1555	-100.8552	-91.1135	-75.3957	-62.4223	-59.9898	-48.931	-43.7514	-39.6015	-36.0747	-29.5919	-21.7147	-18.6642	-14.5487	-9.4458	-5.0104	-3.6075
27985680	160288	0.00249775	-459.8952	-424.154	-402.2802	-368.0318	-323.1061	-267.084	-201.6723	-132.824	-125.2688	-111.0818	-100.7481	-90.9316	-75.1727	-62.0258	-59.9403	-48.8236	-42.7361	-38.356	-35.8595	-29.4226	-21.3949	-18.1722	-14.2132	-9.1442	-4.7313	-3.2892
28307290	161207	0.00249062	-460.0331	-424.228	-402.2149	-367.7607	-322.5728	-266.233	-200.4573	-132.7127	-123.8236	-110.9989	-100.6395	-90.7473	-74.9479	-61.6329	-59.8899	-48.7195	-41.9396	-36.9596	-35.5566	-29.2506	-21.0859	-17.654	-13.8703	-8.8408	-4.4483	-2.9673
28633540	162133	0.0024835	-460.1708	-424.3013	-402.1476	-367.4859	-322.0336	-265.3734	-199.231	-132.6355	-122.3442	-110.9035	-100.5292	-90.5603	-74.7213	-61.2425	-59.8384	-48.6171	-41.2883	-35.924	-34.7363	-29.0737	-20.7856	-17.1104	-13.5187	-8.5355	-4.1615	-2.6414
28744490	162447	0.0024811	-460.2172	-424.3259	-402.1245	-367.3925	-321.8506	-265.0819	-198.8153	-132.6149	-121.8412	-110.8677	-100.4916	-90.4967	-74.6445	-61.1113	-59.8208	-48.5829	-41.0904	-35.758	-34.2548	-29.0122	-20.6861	-16.9218	-13.3978	-8.4322	-4.064	-2.5306
28855510	162760	0.00247871	-460.2633	-424.3502	-402.1012	-367.299	-321.6676	-264.7906	-198.4	-132.5965	-121.3392	-110.8297	-100.454	-90.433	-74.5679	-60.9808	-59.8032	-48.5489	-40.901	-35.6376	-33.7232	-28.9494	-20.5876	-16.7311	-13.2762	-8.3292	-3.9665	-2.4199
28967740	163077	0.00247631	-460.3097	-424.3746	-402.0776	-367.2046	-321.4829	-264.4966	-197.981	-132.5799	-120.8334	-110.7889	-100.4159	-90.3685	-74.4906	-60.8496	-59.7854	-48.5148	-40.7171	-35.5387	-33.1608	-28.8842	-20.4891	-16.5366	-13.1523	-8.2253	-3.8679	-2.3079
29080110	163393	0.00247391	-460.3559	-424.3989	-402.0539	-367.11	-321.2982	-264.2027	-197.5621	-132.565	-120.3294	-110.7453	-100.3778	-90.3039	-74.4133	-60.719	-59.7674	-48.4808	-40.5393	-35.4516	-32.5859	-28.8163	-20.3914	-16.34	-13.0272	-8.1216	-3.7692	-2.1958
29193230	163710	0.00247151	-460.4022	-424.4231	-402.0298	-367.0148	-321.1124	-263.9072	-197.1411	-132.5515	-119.8252	-110.6981	-100.3394	-90.2388	-74.3357	-60.5881	-59.7493	-48.4468	-40.3658	-35.3707	-32.0031	-28.744	-20.294	-16.1404	-12.9001	-8.0174	-3.6699	-2.083
29306820	164028	0.00246911	-460.4484	-424.4472	-402.0056	-366.9193	-320.9261	-263.6109	-196.7191	-132.5393	-119.3226	-110.6469	-100.3007	-90.1734	-74.2579	-60.4573	-59.7311	-48.4129	-40.1962	-35.2936	-31.4198	-28.6649	-20.197	-15.9382	-12.771	-7.9131	-3.5702	-1.9696
29421120	164348	0.00246671	-460.4947	-424.4713	-401.9811	-366.8232	-320.7388	-263.3132	-196.2952	-132.5282	-118.8216	-110.591	-100.2618	-90.1074	-74.1798	-60.3264	-59.7127	-48.3789	-40.0297	-35.2187	-30.842	-28.5743	-20.1002	-15.7332	-12.6396	-7.8084	-3.4699	-1.8556
29535420	164667	0.00246432	-460.5407	-424.4952	-401.9565	-366.7271	-320.5517	-263.0159	-195.872	-132.5182	-118.3262	-110.5299	-100.2227	-90.0413	-74.1018	-60.1961	-59.6943	-48.3451	-39.8668	-35.1454	-30.2839	-28.4638	-20.004	-15.5265	-12.5062	-7.704	-3.3696	-1.7414
29650880	164988	0.00246192	-460.587	-424.5191	-401.9315	-366.6301	-320.3629	-262.7161	-195.4452	-132.5091	-117.8325	-110.4619	-100.1832	-89.9744	-74.0232	-60.065	-59.6755	-48.3111	-39.7054	-35.0726	-29.7607	-28.3127	-19.9073	-15.3163	-12.3693	-7.5988	-3.2683	-1.626
29766670	165310	0.00245952	-460.6331	-424.5429	-401.9063	-366.5328	-320.1738	-262.4159	-195.0179	-132.5009	-117.3454	-110.3863	-100.1435	-89.9071	-73.9445	-59.9343	-59.6566	-48.2771	-39.5464	-35.0004	-29.3148	-28.0849	-19.8109	-15.1042	-12.2295	-7.4936	-3.1668	-1.5102
29883140	165633	0.00245712	-460.6793	-424.5666	-401.8809	-366.435	-319.9838	-262.1143	-194.5889	-132.4933	-116.8651	-110.3014	-100.1035	-89.8393	-73.8655	-59.8038	-59.637	-48.2431	-39.3891	-34.9282	-28.987	-27.7381	-19.7142	-14.8895	-12.0858	-7.3881	-3.0647	-1.3936
30000000	165957	0.00245472	-460.7254	-424.5902	-401.8553	-366.3368	-319.7933	-261.8122	-194.1591	-132.4865	-116.3947	-110.2057	-100.0631	-89.7711	-73.7864	-59.6759	-59.6148	-48.2091	-39.2337	-34.8562	-28.7739	-27.2787	-19.6175	-14.6731	-11.9381	-7.2824	-2.9622	-1.2764
30093730	166216	0.00245281	-460.7621	-424.609	-401.8346	-366.2581	-319.6408	-261.5702	-193.815	-132.4815	-116.0271	-110.1199	-100.0307	-89.7162	-73.7231	-59.6107	-59.5599	-48.1819	-39.1105	-34.7985	-28.6558	-26.861	-19.54	-14.4989	-11.8168	-7.1978	-2.8801	-1.1824
30188140	166476	0.00245089	-460.799	-424.6278	-401.8138	-366.1789	-319.4872	-261.3267	-193.4688	-132.4768	-115.6669	-110.0242	-99.9979	-89.6607	-73.6594	-59.5913	-59.4587	-48.1546	-38.9878	-34.7404	-28.5632	-26.4176	-19.4619	-14.3232	-11.6915	-7.1128	-2.7973	-1.0875
30282420	166736	0.00244898	-460.8357	-424.6465	-401.7929	-366.0998	-319.334	-261.0838	-193.1236	-132.4725	-115.3187	-109.9178	-99.965	-89.6052	-73.5959	-59.5751	-59.3547	-48.1274	-38.8665	-34.6824	-28.4861	-25.9638	-19.3839	-14.1475	-11.5631	-7.0281	-2.7147	-0.9926
30377080	166996	0.00244707	-460.8724	-424.6651	-401.7718	-366.0204	-319.1803	-260.8403	-192.7775	-132.4685	-114.9821	-109.7988	-99.9319	-89.5492	-73.5322	-59.5592	-59.2501	-48.1001	-38.7459	-34.6242	-28.418	-25.5035	-19.3053	-13.9712	-11.4303	-6.9432	-2.6318	-0.8971
30472610	167259	0.00244515	-460.9093	-424.6837	-401.7505	-365.9402	-319.0254	-260.5948	-192.4287	-132.4647	-114.6573	-109.6648	-99.8983	-89.4925	-73.468	-59.5434	-59.1447	-48.0727	-38.6252	-34.5653	-28.3553	-25.0382	-19.2256	-13.7936	-11.2919	-6.8577	-2.5481	-0.8006
30568170	167521	0.00244324	-460.946	-424.7022	-401.7291	-365.8601	-318.8705	-260.3495	-192.0802	-132.4613	-114.3489	-109.5151	-99.8646	-89.4356	-73.4039	-59.5276	-59.0394	-48.0453	-38.5057	-34.5063	-28.2967	-24.5744	-19.1455	-13.6166	-11.1484	-6.7723	-2.4644	-0.7039
30664280	167784	0.00244132	-460.9827	-424.7207	-401.7076	-365.7795	-318.7149	-260.1031	-191.7302	-132.4581	-114.057	-109.3472	-99.8305	-89.3782	-73.3395	-59.5117	-58.9338	-48.0179	-38.3864	-34.4467	-28.2406	-24.1113	-19.0642	-13.4396	-10.9985	-6.6865	-2.3803	-0.6064
30760430	168047	0.00243941	-461.0194	-424.7391	-401.6859	-365.699	-318.5593	-259.8569	-191.3806	-132.4551	-113.7846	-109.1608	-99.7961	-89.3205	-73.2752	-59.4959	-58.8284	-47.9904	-38.2682	-34.387	-28.1866	-23.653	-18.982	-13.264	-10.8424	-6.6009	-2.2961	-0.5086
30857300	168311	0.00243749	-461.0561	-424.7575	-401.664	-365.6178	-318.4028	-259.6092	-191.0288	-132.4523	-113.531	-108.9532	-99.7613	-89.262	-73.2105	-59.4798	-58.7224	-47.9629	-38.15	-34.3266	-28.1338	-23.1974	-18.8979	-13.0889	-10.678	-6.5148	-2.2113	-0.4099
30954380	168576	0.00243558	-461.0928	-424.7758	-401.642	-365.5365	-318.246	-259.3612	-190.6768	-132.4498	-113.2983	-108.725	-99.7261	-89.2031	-73.1458	-59.4638	-58.6165	-47.9353	-38.0325	-34.2659	-28.0821	-22.7481	-18.8121	-12.9157	-10.5054	-6.4286	-2.1263	-0.3106
31052170	168842	0.00243366	-461.1296	-424.7941	-401.6197	-365.4546	-318.0883	-259.1117	-190.3226	-132.4474	-113.0855	-108.4748	-99.6903	-89.1435	-73.0806	-59.4475	-58.51	-47.9075	-37.9152	-34.2045	-28.031	-22.3041	-18.7234	-12.7439	-10.323	-6.3419	-2.0408	-0.2102
31149850	169107	0.00243175	-461.1662	-424.8123	-401.5975	-365.3728	-317.9309	-258.8628	-189.9694	-132.4453	-112.8939	-108.2053	-99.6543	-89.0836	-73.0157	-59.4313	-58.4039	-47.8799	-37.7989	-34.1428	-27.9807	-21.8705	-18.632	-12.5756	-10.1315	-6.2555	-1.9553	-0.1096
31449460	169919	0.00242594	-461.2774	-424.8672	-401.5287	-365.1222	-317.4489	-258.1012	-188.8891	-132.4397	-112.4233	-107.271	-99.541	-88.8975	-72.8169	-59.3814	-58.08	-47.7953	-37.448	-33.9517	-27.83	-20.6197	-18.3212	-12.0824	-9.4799	-5.9909	-1.6932
31752680	170736	0.00242013	-461.3885	-424.9217	-401.4584	-364.8687	-316.9625	-257.3333	-187.8004	-132.4353	-112.0877	-106.2019	-99.4205	-88.7046	-72.6166	-59.3306	-57.7542	-47.7101	-37.1015	-33.7547	-27.6811	-19.5386	-17.9062	-11.6228	-8.7131	-5.7236	-1.4281
32059570	171559	0.00241431	-461.4996	-424.9756	-401.3867	-364.6125	-316.4717	-256.559	-186.7033	-132.4321	-111.8439	-105.0466	-99.289	-88.5037	-72.4147	-59.2789	-57.4266	-47.6242	-36.7597	-33.5511	-27.5327	-18.756	-17.2695	-11.1971	-7.8256	-5.4521	-1.1597
32370170	172388	0.0024085	-461.6105	-425.029	-401.3135	-364.3533	-315.9763	-255.7781	-185.5977	-132.4297	-111.6596	-103.8466	-99.139	-88.2931	-72.2111	-59.2262	-57.0969	-47.5374	-36.4229	-33.3401	-27.384	-18.2731	-16.4167	-10.8	-6.8253	-5.1725	-0.888
32684550	173223	0.00240269	-461.7213	-425.0819	-401.2388	-364.0914	-315.4764	-254.9908	-184.4836	-132.4281	-111.5141	-102.6411	-98.9546	-88.0705	-72.0057	-59.1727	-56.765	-47.4498	-36.0919	-33.1207	-27.2346	-17.9355	-15.5033	-10.425	-5.7458	-4.8638	-0.6127
33002750	174064	0.00239687	-461.832	-425.1342	-401.1625	-363.8265	-314.9719	-254.1969	-183.3609	-132.4271	-111.3943	-101.4849	-98.6971	-87.8327	-71.7986	-59.1181	-56.4308	-47.3613	-35.7671	-32.8922	-27.0841	-17.6527	-14.616	-10.0657	-4.8406	-4.2937	-0.3334
33163510	174488	0.00239396	-461.8873	-425.1602	-401.1238	-363.6928	-314.7176	-253.797	-182.7955	-132.4267	-111.3414	-100.9545	-98.5146	-87.7068	-71.6941	-59.0904	-56.2626	-47.3166	-35.6071	-32.774	-27.0083	-17.5206	-14.1901	-9.8902	-4.6179	-3.7544	-0.1918
33324830	174911	0.00239106	-461.9425	-425.186	-401.0848	-363.5587	-314.4628	-253.3964	-182.2295	-132.4265	-111.2922	-100.4833	-98.2736	-87.5757	-71.5895	-59.0626	-56.0942	-47.2718	-35.4493	-32.6536	-26.9323	-17.3925	-13.7785	-9.7174	-4.4513	-3.1517	-0.0492
33487410	175338	0.00238816	-461.9978	-425.2117	-401.0453	-363.4237	-314.2064	-252.9935	-181.6603	-132.4264	-111.2461	-100.0891	-97.9541	-87.4381	-71.4842	-59.0344	-55.9249	-47.2266	-35.2933	-32.5303	-26.8557	-17.2667	-13.3792	-9.5462	-4.3001	-2.529
33650850	175765	0.00238525	-462.053	-425.2373	-401.0054	-363.288	-313.949	-252.5892	-181.0893	-132.4264	-111.2026	-99.7814	-97.5501	-87.2935	-71.3785	-59.006	-55.7551	-47.1812	-35.1393	-32.4042	-26.7788	-17.1428	-12.9927	-9.3766	-4.1548	-1.9051
33815850	176195	0.00238233	-462.1084	-425.2628	-400.965	-363.1511	-313.6895	-252.1818	-180.5143	-132.4265	-111.1612	-99.5488	-97.0714	-87.1402	-71.2719	-58.9773	-55.584	-47.1353	-34.9869	-32.2749	-26.7012	-17.0197	-12.6164	-9.2076	-4.0116	-1.2897
33981950	176628	0.00237942	-462.1637	-425.2881	-400.9243	-363.0134	-313.4287	-251.7725	-179.9366	-132.4267	-111.1217	-99.3723	-96.5408	-86.9771	-71.1648	-58.9482	-55.4121	-47.0891	-34.8366	-32.1425	-26.623	-16.8974	-12.2508	-9.0395	-3.8694	-0.6977
34317140	177496	0.00237359	-462.2743	-425.3384	-400.8415	-362.7357	-312.9037	-250.949	-178.775	-132.4271	-111.0474	-99.1187	-95.4016	-86.6157	-70.9488	-58.8894	-55.0663	-46.9959	-34.5427	-31.8688	-26.4652	-16.6544	-11.5483	-8.7055	-3.5864
34656470	178372	0.00236776	-462.3848	-425.3882	-400.7571	-362.455	-312.3738	-250.1185	-177.6044	-132.4278	-110.978	-98.9322	-94.2386	-86.1935	-70.7305	-58.8295	-54.7176	-46.9013	-34.2579	-31.5828	-26.305	-16.4123	-10.8783	-8.3731	-3.3032
35000000	179254	0.00236192	-462.4951	-425.4374	-400.6711	-362.1712	-311.8391	-249.281	-176.4248	-132.4286	-110.9125	-98.7766	-93.1101	-85.69	-70.5096	-58.7684	-54.3657	-46.8053	-33.9821	-31.2847	-26.1423	-16.1701	-10.2346	-8.0414	-3.019
35582780	180740	0.00235219	-462.679	-425.5182	-400.5239	-361.6906	-310.9357	-247.8678	-174.4361	-132.43	-110.8091	-98.5485	-91.4107	-84.6021	-70.1346	-58.664	-53.7712	-46.6417	-33.5413	-30.7613	-25.8644	-15.7641	-9.2061	-7.4874	-2.541
36177740	182245	0.00234246	-462.8626	-425.5973	-400.3721	-361.2012	-310.0183	-246.4345	-172.4218	-132.4314	-110.7108	-98.3383	-90.0436	-83.1278	-69.7503	-58.5562	-53.1668	-46.4733	-33.1225	-30.2083	-25.5772	-15.3544	-8.2204	-6.9302	-2.0573
36785190	183768	0.00233273	-463.0458	-425.6748	-400.2155	-360.7029	-309.0867	-244.981	-170.3816	-132.4325	-110.6159	-98.1356	-89.0202	-81.2713	-69.3539	-58.445	-52.5515	-46.2995	-32.7221	-29.6303	-25.279	-14.9396	-7.267	-6.367	-1.5671
37405440	185311	0.002323	-463.2287	-425.7507	-400.0542	-360.1953	-308.1406	-243.5067	-168.3155	-132.433	-110.5229	-97.936	-88.2565	-79.1284	-68.9406	-58.3301	-51.9244	-46.1194	-32.3363	-29.033	-24.9677	-14.519	-6.3421	-5.7927	-1.0694
38033860	186861	0.00231334	-463.4098	-425.8242	-399.8892	-359.6826	-307.1874	-242.0232	-166.2395	-132.4327	-110.4316	-97.7388	-87.6611	-76.8276	-68.5046	-58.2121	-51.2891	-45.9332	-31.9645	-28.4269	-24.6429	-14.0951	-5.4698	-5.1893	-0.5673
38675540	188431	0.00230369	-463.5906	-425.896	-399.7193	-359.1605	-306.2194	-240.5187	-164.1376	-132.4311	-110.3407	-97.5412	-87.1627	-74.4432	-68.0217	-58.0898	-50.6393	-45.7379	-31.6004	-27.8138	-24.2987	-13.6643	-4.7444	-4.4471	-0.056
39330800	190021	0.00229403	-463.7711	-425.9661	-399.5444	-358.629	-305.2365	-238.9929	-162.01	-132.4281	-110.2495	-97.3424	-86.7229	-72.0754	-67.4354	-57.9627	-49.973	-45.5312	-31.2415	-27.2002	-23.9305	-13.226	-4.1351	-3.5953
40000000	191630	0.00228438	-463.9512	-426.0344	-399.3645	-358.0878	-304.2385	-237.4454	-159.8566	-132.4229	-110.1577	-97.1419	-86.3193	-69.926	-66.5735	-57.8297	-49.2881	-45.3091	-30.8857	-26.5933	-23.5327	-12.7796	-3.5411	-2.7339
40275930	192290	0.00228046	-464.0243	-426.0617	-399.2899	-357.8652	-303.8286	-236.8105	-158.9745	-132.42	-110.1201	-97.0598	-86.1625	-69.2056	-66.0596	-57.7736	-49.004	-45.2131	-30.7417	-26.3505	-23.3611	-12.5958	-3.2995	-2.3859
40554180	192953	0.00227653	-464.0973	-426.0886	-399.2145	-357.641	-303.4162	-236.172	-158.0884	-132.4167	-110.0823	-96.9775	-86.0089	-68.6128	-65.4144	-57.7159	-48.7165	-45.1131	-30.5979	-26.1105	-23.1832	-12.4107	-3.0573	-2.0398
40834940	193620	0.00227261	-464.1702	-426.1152	-399.1382	-357.4151	-303.0011	-235.5297	-157.1979	-132.4128	-110.0443	-96.8947	-85.8578	-68.1428	-64.6438	-57.6563	-48.4252	-45.008	-30.4541	-25.8738	-22.9983	-12.2241	-2.814	-1.6955
41117990	194290	0.00226869	-464.2431	-426.1415	-399.061	-357.1876	-302.5837	-234.8839	-156.3038	-132.4083	-110.006	-96.8116	-85.7089	-67.7687	-63.7777	-57.5942	-48.1305	-44.897	-30.3104	-25.6411	-22.8063	-12.036	-2.5699	-1.3536
41691640	195640	0.00226084	-464.3888	-426.1933	-398.9041	-356.7276	-301.7407	-233.5809	-154.5031	-132.3969	-109.9286	-96.6442	-85.4163	-67.1924	-61.8839	-57.4577	-47.5308	-44.651	-30.0225	-25.1885	-22.3988	-11.6552	-2.0784	-0.677
42275320	197005	0.002253	-464.5342	-426.2438	-398.7435	-356.2608	-300.887	-232.2628	-152.6871	-132.3819	-109.85	-96.475	-85.1287	-66.7297	-59.928	-57.2804	-46.9223	-44.3576	-29.7336	-24.755	-21.9586	-11.2679	-1.5823	-0.0116
42567410	197685	0.00224913	-464.6059	-426.2682	-398.6629	-356.0278	-300.4614	-231.606	-151.7847	-132.3727	-109.8107	-96.3908	-84.988	-66.5216	-59.001	-57.1431	-46.622	-44.1862	-29.5905	-24.5482	-21.7288	-11.0742	-1.3354
42714410	198026	0.00224719	-464.6418	-426.2804	-398.6223	-355.9106	-300.2476	-231.2762	-151.3323	-132.3676	-109.7908	-96.3486	-84.9179	-66.4207	-58.5729	-57.0395	-46.473	-44.0917	-29.5187	-24.4466	-21.6109	-10.9767	-1.2115
42862040	198368	0.00224525	-464.6776	-426.2924	-398.5814	-355.793	-300.0331	-230.9454	-150.879	-132.3622	-109.7709	-96.3062	-84.848	-66.3215	-58.1933	-56.8888	-46.3254	-43.9903	-29.4469	-24.3462	-21.4909	-10.8788	-1.0873
42936090	198539	0.00224428	-464.6955	-426.2984	-398.5609	-355.7341	-299.9256	-230.7797	-150.6521	-132.3593	-109.7609	-96.285	-84.813	-66.2724	-58.0303	-56.7874	-46.2522	-43.9367	-29.4109	-24.2964	-21.4302	-10.8297	-1.0251
43010310	198710	0.00224331	-464.7134	-426.3044	-398.5403	-355.675	-299.8179	-230.6138	-150.425	-132.3563	-109.7509	-96.2637	-84.7781	-66.2237	-57.889	-56.6648	-46.1795	-43.881	-29.3749	-24.247	-21.3689	-10.7805	-0.9628
43084680	198882	0.00224234	-464.7313	-426.3103	-398.5197	-355.6158	-299.7101	-230.4476	-150.1977	-132.3532	-109.7408	-96.2424	-84.7432	-66.1752	-57.7703	-56.5204	-46.1074	-43.8231	-29.3389	-24.1978	-21.3072	-10.7312	-0.9005
43159220	199054	0.00224137	-464.7492	-426.3162	-398.499	-355.5566	-299.6021	-230.2811	-149.9702	-132.35	-109.7308	-96.2211	-84.7084	-66.1271	-57.6726	-56.3557	-46.036	-43.7629	-29.3028	-24.1488	-21.245	-10.6818	-0.838
43308770	199399	0.00223944	-464.785	-426.3281	-398.4574	-355.4377	-299.3856	-229.9476	-149.5147	-132.3433	-109.7105	-96.1784	-84.6388	-66.0314	-57.5275	-55.9788	-45.8954	-43.6348	-29.2306	-24.0518	-21.1191	-10.5826	-0.7129
43458980	199744	0.0022375	-464.8208	-426.3398	-398.4157	-355.3184	-299.1685	-229.613	-149.0585	-132.336	-109.6902	-96.1355	-84.5692	-65.9367	-57.4268	-55.5617	-45.7583	-43.4958	-29.1582	-23.9559	-20.9913	-10.483	-0.5875
43761340	200438	0.00223362	-464.8923	-426.363	-398.3315	-355.0786	-298.7322	-228.9411	-148.1443	-132.3199	-109.6492	-96.0495	-84.4303	-65.7491	-57.2903	-54.6779	-45.4962	-43.1806	-29.013	-23.7671	-20.7301	-10.2824	-0.3358
44066340	201135	0.00222975	-464.9638	-426.3859	-398.2463	-354.837	-298.2931	-228.2652	-147.228	-132.3011	-109.6076	-95.963	-84.2916	-65.5637	-57.1911	-53.7822	-45.2525	-42.8097	-28.8671	-23.582	-20.4616	-10.08	-0.0827
44684350	202541	0.002222	-465.1065	-426.4307	-398.0733	-354.3486	-297.4068	-226.902	-145.3913	-132.2534	-109.523	-95.7886	-84.0142	-65.1966	-57.0305	-52.0534	-44.821	-41.8791	-28.5729	-23.2215	-19.9045	-9.6696
45313230	203961	0.00221425	-465.249	-426.4743	-397.8966	-353.8532	-296.5094	-225.5229	-143.5547	-132.1868	-109.436	-95.6122	-83.7366	-64.8321	-56.8866	-50.4781	-44.4474	-40.6808	-28.2747	-22.8712	-19.3226	-9.2515
45953220	205396	0.0022065	-465.3913	-426.5165	-397.7161	-353.3506	-295.6008	-224.1279	-141.729	-132.0905	-109.3464	-95.4337	-83.4582	-64.4684	-56.7474	-49.0987	-44.1042	-39.2165	-27.9711	-22.5281	-18.7181	-8.8252
46604540	206847	0.00219875	-465.5333	-426.5573	-397.5317	-352.8408	-294.6808	-222.7168	-139.9344	-131.9445	-109.2536	-95.2532	-83.1786	-64.1039	-56.609	-47.9253	-43.7666	-37.5097	-27.6599	-22.1891	-18.0928	-8.3904
47267440	208312	0.002191	-465.6752	-426.5968	-397.3434	-352.3237	-293.7492	-221.2893	-138.2105	-131.7096	-109.1572	-95.0704	-82.8973	-63.738	-56.4695	-46.944	-43.4147	-35.603	-27.3369	-21.8514	-17.4477	-7.9465
47932710	209773	0.00218336	-465.8148	-426.6344	-397.1539	-351.8064	-292.8191	-219.8653	-136.6559	-131.3152	-109.0579	-94.8881	-82.618	-63.3752	-56.3301	-46.1401	-43.0382	-33.5805	-26.9978	-21.5169	-16.7922	-7.4995
48269440	210509	0.00217954	-465.8844	-426.6527	-397.0578	-351.5453	-292.3502	-219.1479	-135.9718	-131.0193	-109.0065	-94.7962	-82.4776	-63.193	-56.2596	-45.7917	-42.8352	-32.5363	-26.815	-21.3483	-16.4573	-7.2725
48609730	211250	0.00217572	-465.9542	-426.6706	-396.9605	-351.2819	-291.8775	-218.4251	-135.373	-130.6324	-108.9537	-94.7035	-82.3364	-63.0098	-56.1883	-45.4744	-42.6206	-31.4807	-26.6162	-21.1778	-16.1165	-7.0426
48952660	211993	0.0021719	-466.0237	-426.6882	-396.8624	-351.0168	-291.4024	-217.6989	-134.8743	-130.1424	-108.8993	-94.6104	-82.1947	-62.8261	-56.1165	-45.186	-42.3944	-30.4314	-26.3918	-21.0053	-15.7703	-6.8102
49298740	212741	0.00216807	-466.0933	-426.7055	-396.7632	-350.7498	-290.9242	-216.9683	-134.4768	-129.5472	-108.8433	-94.5166	-82.0523	-62.6417	-56.0439	-44.9234	-42.1565	-29.4114	-26.1216	-20.8296	-15.4177	-6.575
50000000	214249	0.00216043	-466.2322	-426.7389	-396.5618	-350.2102	-289.959	-215.4947	-133.9373	-128.091	-108.7253	-94.3274	-81.7653	-62.2705	-55.8966	-44.4643	-41.6478	-27.6616	-25.2616	-20.4635	-14.6905	-6.0959
50923080	216218	0.00215057	-466.4111	-426.7799	-396.2961	-349.5029	-288.6962	-213.5689	-133.5599	-125.8765	-108.5583	-94.0796	-81.3904	-61.7868	-55.7019	-43.9714	-40.938	-26.4538	-23.123	-19.9213	-13.6933	-5.4589
51867560	218214	0.00214072	-466.5895	-426.8185	-396.0234	-348.7826	-287.413	-211.6143	-133.3578	-123.4739	-108.3675	-93.8275	-81.0095	-61.2972	-55.5017	-43.5533	-40.185	-25.8441	-20.7788	-18.9988	-12.5863	-4.7967
52834040	220237	0.00213086	-466.7676	-426.8547	-395.7437	-348.0491	-286.1091	-209.6304	-133.2378	-120.989	-108.1404	-93.5707	-80.6218	-60.8016	-55.2957	-43.1809	-39.4033	-25.3695	-19.6087	-16.9047	-11.2684	-4.1025
53823130	222289	0.002121	-466.9452	-426.8883	-395.4569	-347.3021	-284.7841	-207.6169	-133.1606	-118.4856	-107.8531	-93.3088	-80.2265	-60.2996	-55.0836	-42.8358	-38.6016	-24.9346	-19.002	-14.5634	-9.5499	-3.3612
54831110	224361	0.00211118	-467.1217	-426.9192	-395.164	-346.5447	-283.4434	-205.5819	-133.1078	-116.0413	-107.4593	-93.0424	-79.8242	-59.7933	-54.866	-42.5077	-37.7882	-24.5166	-18.4827	-12.6809	-7.2987	-2.5367
55862800	226462	0.00210137	-467.2979	-426.9476	-394.8637	-345.7734	-282.081	-203.5165	-133.0699	-113.7564	-106.8579	-92.7695	-79.4118	-59.2802	-54.6417	-42.1879	-36.9621	-24.105	-17.9782	-11.2434	-4.7462	-1.4856
56387820	227524	0.00209646	-467.3858	-426.9608	-394.7108	-345.3825	-281.3914	-202.472	-133.0548	-112.7315	-106.4237	-92.6302	-79.2012	-59.021	-54.527	-42.0296	-36.5445	-23.9002	-17.7256	-10.6291	-3.5665	-0.7412
56918860	228593	0.00209155	-467.4736	-426.9733	-394.556	-344.988	-280.6965	-201.4201	-133.0416	-111.8261	-105.8611	-92.4886	-78.9875	-58.7602	-54.4105	-41.8717	-36.1243	-23.6958	-17.4716	-10.0576	-2.6013
57456260	229669	0.00208665	-467.5613	-426.9851	-394.3992	-344.59	-279.9958	-200.3601	-133.03	-111.0645	-105.1461	-92.3445	-78.7703	-58.4976	-54.2922	-41.7139	-35.7012	-23.4915	-17.2154	-9.5158	-1.8661
58000000	230753	0.00208174	-467.6489	-426.9963	-394.2405	-344.1883	-279.2895	-199.2922	-133.0197	-110.4529	-104.2738	-92.1974	-78.5491	-58.2332	-54.1719	-41.5559	-35.2753	-23.2872	-16.9567	-8.9953	-1.2811
58458310	231663	0.00207765	-467.7218	-427.0051	-394.1067	-343.8506	-278.6961	-198.3957	-133.0119	-110.0468	-103.4378	-92.072	-78.3613	-58.0114	-54.0702	-41.4238	-34.9181	-23.1168	-16.7388	-8.5732	-0.8545
58921140	232579	0.00207355	-467.7947	-427.0134	-393.9715	-343.5103	-278.0988	-197.4936	-133.0049	-109.7181	-102.521	-91.9434	-78.1703	-57.7884	-53.9672	-41.2912	-34.5589	-22.9462	-16.5188	-8.1595	-0.4574
59860640	234426	0.00206537	-467.9403	-427.0285	-393.697	-342.822	-276.892	-195.6724	-132.9923	-109.2276	-100.5152	-91.6739	-77.7768	-57.3386	-53.7567	-41.0242	-33.8345	-22.6042	-16.0719	-7.3506
60818940	236294	0.00205718	-468.0856	-427.0417	-393.4169	-342.1231	-275.6688	-193.8284	-132.9814	-108.8772	-98.3756	-91.3775	-77.3648	-56.8838	-53.5403	-40.754	-33.1021	-22.2611	-15.6152	-6.5593
61796490	238186	0.002049	-468.2306	-427.0529	-393.1311	-341.4136	-274.4289	-191.9612	-132.9717	-108.6063	-96.1963	-91.0263	-76.9292	-56.424	-53.3175	-40.48	-32.3614	-21.9166	-15.148	-5.78
62815220	240141	0.00204064	-468.3783	-427.0621	-392.8333	-340.6778	-273.1451	-190.0301	-132.9626	-108.3776	-94.0607	-90.5222	-76.4521	-55.9494	-53.0829	-40.1956	-31.596	-21.5631	-14.6594	-4.993
63332710	241128	0.00203646	-468.4521	-427.066	-392.6819	-340.3054	-272.4962	-189.0548	-132.9583	-108.2752	-93.1144	-90.137	-76.1975	-55.71	-52.9626	-40.0514	-31.2098	-21.3856	-14.4106	-4.6019
63593370	241624	0.00203437	-468.489	-427.0677	-392.6057	-340.1182	-272.1701	-188.5649	-132.9562	-108.2262	-92.6993	-89.8853	-76.0655	-55.5899	-52.9018	-39.9788	-31.0158	-21.2967	-14.2851	-4.407
63855030	242121	0.00203228	-468.5258	-427.0693	-392.5292	-339.9305	-271.8434	-188.0742	-132.9542	-108.1786	-92.3341	-89.5844	-75.93	-55.4697	-52.8404	-39.906	-30.8215	-21.2077	-14.1589	-4.2127
64118730	242620	0.00203019	-468.5627	-427.0707	-392.4521	-339.7416	-271.5146	-187.5806	-132.9521	-108.132	-92.0212	-89.2299	-75.7901	-55.3489	-52.7784	-39.8326	-30.6261	-21.1184	-14.0317	-4.0181
64383440	243120	0.0020281	-468.5995	-427.072	-392.3747	-339.5521	-271.1851	-187.086	-132.95	-108.0865	-91.7595	-88.8259	-75.6461	-55.2279	-52.7159	-39.759	-30.4304	-21.0291	-13.9038	-3.8241
64916440	244125	0.00202392	-468.673	-427.0742	-392.2189	-339.1715	-270.5234	-186.0932	-132.946	-107.9983	-91.3589	-87.9012	-75.3434	-54.9854	-52.5892	-39.6108	-30.0374	-20.8502	-13.646	-3.4372
65455400	245136	0.00201974	-468.7464	-427.0758	-392.0614	-338.7876	-269.8565	-185.0932	-132.9419	-107.913	-91.0662	-86.8784	-75.0168	-54.7416	-52.4599	-39.4609	-29.6417	-20.6706	-13.3847	-3.0509
65726700	245643	0.00201766	-468.7831	-427.0764	-391.9822	-338.5947	-269.5217	-184.5913	-132.9399	-107.8714	-90.9446	-86.3487	-74.8433	-54.6195	-52.3943	-39.3855	-29.4431	-20.5807	-13.253	-2.8583
65862880	245898	0.00201661	-468.8014	-427.0767	-391.9424	-338.498	-269.3538	-184.3398	-132.9389	-107.8508	-90.8881	-86.0815	-74.7535	-54.5584	-52.3612	-39.3476	-29.3436	-20.5356	-13.1868	-2.762
65931100	246025	0.00201609	-468.8106	-427.0768	-391.9224	-338.4495	-269.2698	-184.2138	-132.9384	-107.8405	-90.8607	-85.9474	-74.7078	-54.5278	-52.3446	-39.3286	-29.2938	-20.5131	-13.1537	-2.7139
65953590	246067	0.00201592	-468.8136	-427.0768	-391.9159	-338.4336	-269.2421	-184.1723	-132.9382	-107.8371	-90.8518	-85.9032	-74.6927	-54.5177	-52.3391	-39.3224	-29.2774	-20.5057	-13.1428	-2.698
65977150	246111	0.00201574	-468.8168	-427.0769	-391.909	-338.4169	-269.2131	-184.1289	-132.938	-107.8336	-90.8426	-85.8569	-74.6767	-54.5071	-52.3334	-39.3158	-29.2602	-20.4979	-13.1313	-2.6814
66000000	246154	0.00201557	-468.8198	-427.0769	-391.9023	-338.4006	-269.1849	-184.0867	-132.9379	-107.8302	-90.8337	-85.812	-74.6612	-54.4969	-52.3278	-39.3095	-29.2435	-20.4904	-13.1202	-2.6654
66695540	247447	0.00201029	-468.9124	-427.0774	-391.6992	-337.9079	-268.3305	-182.8072	-132.9327	-107.7284	-90.5867	-84.4551	-74.1602	-54.1868	-52.1568	-39.1159	-28.7371	-20.262	-12.7815	-2.1796
67402210	248755	0.002005	-469.005	-427.077	-391.4928	-337.409	-267.4661	-181.5137	-132.9274	-107.6289	-90.3673	-83.1231	-73.5831	-53.8749	-51.98	-38.9192	-28.2251	-20.0319	-12.4365	-1.6932
68116900	250070	0.00199972	-469.0974	-427.0757	-391.2842	-336.906	-266.5957	-180.2123	-132.922	-107.5313	-90.1641	-81.8565	-72.9118	-53.563	-51.7972	-38.7199	-27.7097	-19.8012	-12.0867	-1.2083
68841090	251396	0.00199444	-469.1896	-427.0734	-391.073	-336.3982	-265.7176	-178.9004	-132.9163	-107.4352	-89.97	-80.682	-72.1233	-53.2513	-51.6069	-38.5177	-27.1898	-19.5693	-11.7313	-0.7237
69576330	252735	0.00198915	-469.2819	-427.0702	-390.8586	-335.8843	-264.8299	-177.5754	-132.9104	-107.3399	-89.7811	-79.6206	-71.1972	-52.94	-51.4075	-38.3121	-26.6643	-19.3358	-11.3696	-0.2383
70319990	254082	0.00198387	-469.3739	-427.066	-390.642	-335.3663	-263.936	-176.2424	-132.9042	-107.2456	-89.5961	-78.6886	-70.1281	-52.6316	-51.1975	-38.1038	-26.1351	-19.1014	-11.0028
71073610	255440	0.00197859	-469.4657	-427.0609	-390.4225	-334.8431	-263.0342	-174.8986	-132.8977	-107.1517	-89.4131	-77.8819	-68.9187	-52.327	-50.9742	-37.8922	-25.6008	-18.8657	-10.6301
71838820	256811	0.0019733	-469.5576	-427.0547	-390.1999	-334.3138	-262.1225	-173.5415	-132.8907	-107.0579	-89.2309	-77.1861	-67.5822	-52.0276	-50.7339	-37.6768	-25.0604	-18.6281	-10.2507
72612870	258191	0.00196802	-469.6492	-427.0476	-389.9749	-333.7803	-261.2045	-172.1762	-132.8833	-106.9643	-89.0496	-76.5844	-66.1453	-51.7365	-50.4738	-37.4583	-24.5156	-18.3894	-9.8661
73397380	259582	0.00196274	-469.7407	-427.0394	-389.747	-333.2414	-260.2782	-170.8001	-132.8753	-106.8706	-88.8684	-76.0557	-64.6285	-51.4549	-50.1894	-37.2363	-23.9652	-18.1492	-9.4753
74194020	260987	0.00195745	-469.8322	-427.0302	-389.5158	-332.6962	-259.3418	-169.4105	-132.8667	-106.7765	-88.6866	-75.5819	-63.0498	-51.1833	-49.8757	-37.0101	-23.4079	-17.9068	-9.0775
75000000	262401	0.00195217	-469.9234	-427.02	-389.2822	-332.1466	-258.3987	-168.0126	-132.8573	-106.6823	-88.5047	-75.1511	-61.434	-50.9227	-49.5292	-36.7805	-22.8454	-17.6631	-8.6741
78572660	268578	0.00192959	-470.312	-426.9645	-388.2494	-329.7339	-254.2691	-161.9124	-132.807	-106.2726	-87.7179	-73.5842	-54.5483	-49.886	-47.4504	-35.752	-20.3614	-16.5972	-6.8753
82360650	274976	0.00190701	-470.6982	-426.889	-387.1602	-327.2165	-249.9773	-155.6188	-132.7288	-105.847	-86.9108	-72.216	-49.7311	-48.7472	-42.8961	-34.6355	-17.723	-15.4742	-4.9501
86378760	281603	0.00188444	-471.0818	-426.7925	-386.0121	-324.5902	-245.5169	-149.1591	-132.5912	-105.3985	-86.0788	-70.9055	-48.1538	-46.8561	-35.6786	-33.3378	-15.0135	-14.0992	-2.887
90644940	288474	0.00186186	-471.4629	-426.6738	-384.802	-321.8491	-240.8792	-142.6407	-132.2821	-104.9181	-85.2187	-69.5976	-47.1	-45.0474	-32.2678	-27.5659	-13.3535	-11.0982	-0.6655
95178800	295600	0.00183928	-471.8416	-426.5319	-383.5264	-318.9871	-236.0548	-136.7344	-131.1322	-104.3916	-84.3274	-68.2648	-46.0311	-43.3319	-30.8344	-20.2751	-12.0549	-6.6087
100000000	302994	0.0018167	-472.2177	-426.3653	-382.1821	-315.9986	-231.0359	-134.0317	-126.5702	-103.7903	-83.4017	-66.8895	-44.9116	-41.6332	-29.313	-14.4744	-10.6664	-0.5016
103700500	308549	0.00180027	-472.4896	-426.228	-381.159	-313.7414	-227.2571	-133.5338	-121.6858	-103.2676	-82.7045	-65.8538	-44.0592	-40.3923	-28.1304	-11.4238	-9.4171
107574200	314259	0.00178384	-472.7601	-426.0764	-380.0962	-311.4114	-223.3667	-133.3076	-116.523	-102.5962	-81.9847	-64.7819	-43.1719	-39.1415	-26.8779	-9.487	-7.5339
111629100	320127	0.00176742	-473.0291	-425.9101	-378.9927	-309.0068	-219.3624	-133.1687	-111.4783	-101.5672	-81.2395	-63.667	-42.2482	-37.8779	-25.5523	-8.2127	-5.2282
115876900	326161	0.00175099	-473.2967	-425.7283	-377.8466	-306.5241	-215.2391	-133.0651	-107.2396	-99.549	-80.4627	-62.4998	-41.2862	-36.5985	-24.1499	-7.0665	-2.8908
120330100	332370	0.00173456	-473.5628	-425.5305	-376.6558	-303.9597	-210.9915	-132.9769	-104.7072	-95.6746	-79.6424	-61.2665	-40.2839	-35.3	-22.6678	-5.9229	-0.5665
125000000	338758	0.00171813	-473.8274	-425.3159	-375.4188	-301.3109	-206.6158	-132.8948	-103.4295	-90.4483	-78.7481	-59.9466	-39.24	-33.9794	-21.1042	-4.75
128782600	343845	0.00170537	-474.0318	-425.1374	-374.4255	-299.1945	-203.1282	-132.832	-102.7784	-86.0667	-77.939	-58.8402	-38.4001	-32.9367	-19.8331	-3.8105
132710100	349049	0.00169261	-474.2353	-424.948	-373.4022	-297.0236	-199.5586	-132.7682	-102.2469	-81.8316	-76.805	-57.6318	-37.5333	-31.8763	-18.5113	-2.8407
136788500	354372	0.00167985	-474.4378	-424.7474	-372.3484	-294.797	-195.9055	-132.7022	-101.7727	-78.7166	-74.4829	-56.2716	-36.6391	-30.7964	-17.1384	-1.8371
141024800	359817	0.00166709	-474.6394	-424.5352	-371.2629	-292.5131	-192.167	-132.6329	-101.327	-77.2105	-70.6006	-54.6695	-35.7168	-29.6942	-15.7139	-0.7961
145426300	365389	0.00165433	-474.84	-424.3111	-370.1448	-290.17	-188.3409	-132.5595	-100.8947	-76.2563	-66.3906	-52.6632	-34.7654	-28.567	-14.2373
150000000	371090	0.00164157	-475.0395	-424.0747	-368.9933	-287.7667	-184.4262	-132.4808	-100.4673	-75.4337	-62.5313	-50.0045	-33.784	-27.4112	-12.708
153840600	375811	0.00163123	-475.2005	-423.8737	-368.0344	-285.7723	-181.1857	-132.4125	-100.1205	-74.7948	-59.8947	-47.2079	-32.9651	-26.4497	-11.4283
157807700	380626	0.00162088	-475.361	-423.664	-367.0513	-283.7343	-177.8819	-132.3394	-99.7711	-74.1617	-57.7366	-43.8208	-32.1231	-25.4616	-10.1104
161899500	385529	0.00161054	-475.5206	-423.4455	-366.0453	-281.655	-174.5197	-132.2607	-99.418	-73.5274	-55.9663	-39.9619	-31.2561	-24.4424	-8.7544
166124800	390527	0.0016002	-475.6795	-423.218	-365.0146	-279.5315	-171.0955	-132.1754	-99.0596	-72.8869	-54.4555	-35.7842	-30.3524	-23.3795	-7.3552
170493200	395629	0.00158985	-475.8379	-422.9809	-363.9577	-277.3604	-167.6056	-132.0822	-98.6944	-72.2369	-53.1037	-31.4997	-29.331	-22.2437	-5.9049
175000000	400824	0.00157951	-475.9954	-422.7344	-362.8762	-275.1457	-164.0586	-131.9793	-98.3222	-71.5769	-51.8488	-28.804	-26.6778	-20.9475	-4.3953
178883600	405247	0.00157087	-476.1265	-422.5208	-361.9515	-273.2571	-161.046	-131.8838	-98.0044	-71.0157	-50.8427	-27.9031	-23.3794	-19.4737	-3.071
182873900	409742	0.00156223	-476.257	-422.3001	-361.0082	-271.3353	-157.9939	-131.7773	-97.6801	-70.4453	-49.8598	-27.0726	-20.9442	-17.0058	-1.6684
186978400	414314	0.00155359	-476.3871	-422.0721	-360.0449	-269.3777	-154.9021	-131.6563	-97.3484	-69.8647	-48.8887	-26.2421	-19.4464	-13.5871	-0.1472
191198800	418964	0.00154494	-476.5167	-421.8366	-359.0617	-267.3845	-151.7774	-131.5151	-97.0086	-69.2736	-47.9223	-25.4011	-18.2759	-9.9249
195536400	423690	0.0015363	-476.6457	-421.5937	-358.0588	-265.3563	-148.6306	-131.3444	-96.66	-68.6716	-46.9557	-24.5467	-17.1956	-6.395
200000000	428498	0.00152766	-476.7742	-421.3428	-357.0346	-263.2899	-145.4756	-131.1263	-96.3013	-68.0576	-45.9839	-23.6763	-16.1379	-3.2359
203914800	432672	0.00152027	-476.8835	-421.1222	-356.1427	-261.4946	-142.8007	-130.8767	-95.9859	-67.5233	-45.1472	-22.9195	-15.2344	-0.9457
207928300	436909	0.00151288	-476.9926	-420.8954	-355.2345	-259.6701	-140.1899	-130.5219	-95.661	-66.9793	-44.3026	-22.1499	-14.3232
212038300	441206	0.0015055	-477.1011	-420.6627	-354.3108	-257.8181	-137.7406	-129.9687	-95.3259	-66.426	-43.4495	-21.3678	-13.4017
216250400	445567	0.00149811	-477.2092	-420.4238	-353.3706	-255.9369	-135.6328	-129.036	-94.9788	-65.8625	-42.5863	-20.5725	-12.4667
220570400	449995	0.00149072	-477.317	-420.1784	-352.413	-254.0248	-134.0874	-127.5018	-94.6173	-65.288	-41.7113	-19.7632	-11.516
225000000	454491	0.00148333	-477.4243	-419.9264	-351.4381	-252.0818	-133.1262	-125.3478	-94.2388	-64.7025	-40.8238	-18.9398	-10.5487
228942900	458456	0.0014769	-477.5173	-419.7019	-350.576	-250.367	-132.6077	-123.1308	-93.8932	-64.1838	-40.0413	-18.2123	-9.6933
232967400	462468	0.00147048	-477.6099	-419.4726	-349.7016	-248.6307	-132.2526	-120.7325	-93.5291	-63.6569	-39.2493	-17.4748	-8.8253
237087100	466539	0.00146405	-477.7023	-419.2377	-348.8122	-246.8676	-131.9877	-118.2224	-93.1412	-63.1197	-38.445	-16.725	-7.9416
250000000	479076	0.00144477	-477.9773	-418.501	-346.0604	-241.4315	-131.4328	-110.4258	-91.7582	-61.4482	-35.961	-14.4079	-5.2012
262126400	490557	0.00142776	-478.2172	-417.8093	-343.524	-236.4449	-131.0549	-103.6855	-89.976	-59.8897	-33.6706	-12.2753	-2.6646
275000000	502459	0.00141075	-478.4545	-417.0759	-340.8793	-231.2688	-130.7039	-97.9794	-86.835	-58.2377	-31.274	-10.0547	-0.0075
287160800	513448	0.00139557	-478.6641	-416.3848	-338.4243	-226.4843	-130.3915	-94.6228	-82.0556	-56.6664	-29.0339	-7.996
291363500	517192	0.00139051	-478.7335	-416.1464	-337.5853	-224.8534	-130.2856	-93.8406	-80.0805	-56.1173	-28.2634	-7.2931
295643400	520977	0.00138545	-478.8026	-415.9038	-336.7356	-223.2043	-130.1783	-93.1736	-77.9707	-55.5529	-27.48	-6.5816
300000000	524801	0.00138039	-478.8715	-415.6573	-335.8757	-221.5374	-130.0696	-92.5928	-75.759	-54.971	-26.6834	-5.8618
314291700	537156	0.00136443	-479.0872	-414.8506	-333.0886	-216.1502	-129.714	-91.101	-68.3721	-52.9715	-24.0686	-3.5315
329442300	549951	0.00134846	-479.3002	-413.9997	-330.1886	-210.569	-129.3357	-89.8683	-60.8847	-50.4888	-21.2724	-1.1111
345516900	563208	0.00133249	-479.5105	-413.102	-327.1697	-204.7848	-128.9301	-88.7367	-54.4252	-46.5911	-18.2319
362584000	576950	0.00131653	-479.7179	-412.1551	-324.0264	-198.7897	-128.4928	-87.6401	-50.2976	-40.131	-14.8329
380718000	591202	0.00130056	-479.9223	-411.1564	-320.7526	-192.5757	-128.0191	-86.5459	-47.4906	-32.3488	-10.8549
400000000	605988	0.0012846	-480.1235	-410.1031	-317.342	-186.135	-127.5036	-85.4357	-45.0125	-24.6357	-5.8922
414801900	617099	0.00127298	-480.2679	-409.3006	-314.7706	-181.3021	-127.0986	-84.6108	-43.2412	-19.5496	-1.3481
430294900	628517	0.00126137	-480.4104	-408.4665	-312.1205	-176.3434	-126.6648	-83.7673	-41.4497	-15.1037
446518100	640256	0.00124975	-480.551	-407.5994	-309.3888	-171.2574	-126.1981	-82.9023	-39.6177	-11.2568
500000000	677515	0.0012149	-480.9607	-404.7867	-300.6744	-155.2508	-124.5297	-80.1481	-33.769	-1.6881
547151000	708741	0.00118783	-481.265	-402.364	-293.3265	-142.2164	-122.7129	-77.8028	-28.769
600000000	742181	0.00116077	-481.5557	-399.7096	-285.4204	-129.9163	-119.1097	-75.2142	-23.2873
647595300	771056	0.00113882	-481.7803	-397.3719	-278.5678	-123.9975	-111.3519	-72.8635	-18.4407
700000000	801647	0.00111688	-481.9937	-394.8527	-271.2867	-121.2405	-99.7963	-70.1425	-13.1883
747915100	828629	0.00109855	-482.1628	-392.5969	-264.8498	-119.4813	-89.3262	-67.3079	-8.453
800000000	856997	0.00108022	-482.3225	-390.1935	-258.0706	-117.7805	-79.2678	-63.1977	-3.3692
848155600	882413	0.00106454	-482.451	-388.0143	-251.9888	-116.2801	-72.3901	-57.3374
900000000	908982	0.00104887	-482.5714	-385.7118	-245.6252	-114.6977	-67.7806	-48.6355
948365700	933087	0.00103524	-482.669	-383.6023	-239.8487	-113.2355	-64.873	-39.4961
1000000000	958152	0.0010216	-482.7594	-381.3895	-233.8403	-111.6811	-62.3792	-29.5154
1048521000	981121	0.00100958	-482.8329	-379.345	-228.3339	-110.2227	-60.3063	-20.2243
1100000000	1004918	0.00099755	-482.8999	-377.2112	-222.6306	-108.6756	-58.2646	-10.5889
1200000000	1049602	0.00097608	-483.0021	-373.1638	-211.9291	-105.6658	-54.5645
1300000000	1092461	0.00095675	-483.073	-369.2358	-201.6817	-102.6466	-51.0787
1400000000	1133700	0.00093918	-483.1179	-365.4175	-191.8449	-99.6158	-47.7349
1500000000	1173491	0.00092312	-483.1408	-361.7003	-182.3829	-96.5716	-44.4978
1600000000	1211976	0.00090835	-483.145	-358.0766	-173.2662	-93.5124	-41.3466
1700000000	1249277	0.00089469	-483.1329	-354.5399	-164.471	-90.4359	-38.2673
1800000000	1285495	0.00088199	-483.1068	-351.0842	-155.9777	-87.3392	-35.2496
1900000000	1320721	0.00087015	-483.0683	-347.7045	-147.771	-84.2184	-32.2851
2000000000	1355031	0.00085906	-483.0188	-344.3959	-139.8391	-81.0688	-29.3668
[truncated: 3 more columns]
